# Supplementary material for: 60 years of scientific deep drilling in Colombia: the north Andean guide to the Quaternary
Source: Copernicus journal article supplement (doi:10.5194/sd-30-1-2022), 2022-02-25
Supplement: Supplementary file 1 [file sd-30-1-2022-supplement.zip]

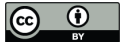

*Supplement of*

## **60 years of scientific deep drilling in Colombia: the north Andean guide to the Quaternary**

**Henry Hooghiemstra et al.**

*Correspondence to:* Henry Hooghiemstra ([h.hooghiemstra@uva.nl](mailto:h.hooghiemstra@uva.nl)) and Suzette G. A. Flantua ([s.g.a.flantua@gmail.com](mailto:s.g.a.flantua@gmail.com))

- [sd-30-1-2022-supplement-title-page.pdf](#)
- [Supplement 2.pdf](#)
- [Supplement 3.pdf](#)
- [Table S1.pdf](#)

The copyright of individual parts of the supplement might differ from the article licence.
