# Supplementary material for: 60 years of scientific deep drilling in Colombia: the north Andean guide to the Quaternary
Source: Copernicus journal article supplement (doi:10.5194/sd-30-1-2022), 2022-02-25
Supplement: Supplementary file 2 [file sd-30-1-2022-supplement.zip]

| Continent | Record                                 | Fig | Elev<br>(masl) | Location<br>[coring year]        | Depth<br>(m) | Age     | References                                                                                                                                                                                   |
|-----------|----------------------------------------|-----|----------------|----------------------------------|--------------|---------|----------------------------------------------------------------------------------------------------------------------------------------------------------------------------------------------|
| Africa    | Lake Albert                            |     | 615            | Uganda/D.R.<br>Congo             | ??           | 30 ka   | Beuning et al. 1997                                                                                                                                                                          |
| Africa    | Lake Bambili,<br>B1& B2                |     | 2273           | Cameroon<br>[2007, 2010]         | 14, 12.6     | 90 ka   | Lézine et al. 2019                                                                                                                                                                           |
| Africa    | Lake Barombi-<br>Mbo Crater            |     | 303            | Cameroon<br>[~1987]              | 23.5         | 28 ka   | Maley & Brenac 1998, Thouveny & Williamson<br>1988, Maley et al. 1990                                                                                                                        |
| Africa    | Lake Barombi-<br>Mbo Crater BM-<br>6   |     | 303            | Cameroon                         | 24           | 33 ka   | Lebamba et al. 2012                                                                                                                                                                          |
| Africa    | Lake Bosumtwi                          |     | 97             | Ghana [~1978]                    | 17           | 28 ka   | Talbot & Delibrias 1977, Talbot 1984, Talbot &<br>Kelts 1986, Maley & Livingstone 1983; Maley<br>1991, Talbot & Johannessen 1992                                                             |
| Africa    | Lake Bosumtwi-<br>5B                   |     | 97             | Ghana [2004]                     | 295          | 540 ka  | Beuning et al. 2003, Koeberl et al. 2005, Miller<br>& Gosling 2014, Shanahan et al. 2012, 2013                                                                                               |
| Africa    | Lake Chad                              | X   | 280            | Chadrill [2019?]                 | 300(700)     | >5 Ma?  | Sylvestre 2018                                                                                                                                                                               |
| Africa    | Lake Chad                              | X   | 280            | Chad-Niger-<br>Nigeria           | 30           | 50 ka   | Maley 1981; Durand 1982                                                                                                                                                                      |
| Africa    | Lake Chad LT1                          | X   | 280            | Chad-Niger-<br>Nigeria [2008]    | 1            | 6.7 ka  | Amaral et al. 2013                                                                                                                                                                           |
| Africa    | Lake Challa -<br>CHALLACEA             | X   | 880            | Kenya-Tanzania<br>[2003, 2005]   | 22           | 140 ka  | Verschuren et al. 2009, Moernout et al. 2010,<br>Pearson et al., 2011; Loomis et al. 2012, 2014;<br>Russell et al. 2017, Weldeab et al. 2007,<br>Tierney et al. 2008                         |
| Africa    | Lake Challa -<br>DeepCHALLA            | X   | 880            | ?? [2016]                        | ??           | 250 ka  | forthcoming                                                                                                                                                                                  |
| Africa    | Lake Magadi<br>MAG14-2A                |     | 606            | Kenya                            | 194          | 1 Ma    | Owen et al. 2018, 2019; Muiruri et al. 2021                                                                                                                                                  |
| Africa    | Lake Magadi<br>OLO12-1A                |     | 606            | Kenya                            | 166          | 1 Ma    | Owen et al. 2018, 2019; Muiruri et al. 2021                                                                                                                                                  |
| Africa    | Lake Malawi                            | X   | 472            | Malawi                           | 170          | 1.2 Ma  | Brown et al. 2007, Beuning et al. 2011; Ivory et<br>al. 2016, 2018; Lyons et al. 2011; Johnson et al.<br>2011, 2016; Scholz et al. 2005, 2007, 2011a,<br>2011b, 2011c; Woltering et al. 2011 |
| Africa    | Lake Malawi                            | X   | 472            | Malawi                           | 10           | 37.4 ka | Scholz & Finney 1994, DeBusk 1998                                                                                                                                                            |
| Africa    | Lake Rutundu-<br>R1, Mt Kenya          |     | 3078           | Kenya                            | 7.5          | 38 ka   | Wooler et al. 2003                                                                                                                                                                           |
| Africa    | Lake Tanganyika                        |     | 773            | Tanzania, D.R.<br>Congo, Burundi | ??           | >90 ka  | Burnett et al. 2011                                                                                                                                                                          |
| Africa    | Lake Tritrivakely                      |     | 1950           | Madagascar                       | ??           | 40 ka   | Gasse & Van Campo 1998                                                                                                                                                                       |
| Africa    | Lake Tule                              | X   | 0              | California, USA<br>[1983]        | 334          | 3 Ma    | Adam 1988; Adam et al. 1988, 1989; Bradbury<br>1991                                                                                                                                          |
| Africa    | Maundi<br>Crater/Mt.<br>Kilimanjaro    |     | 2780           | Kenya                            | ??           | 90 ka   | Schüler et al. 2012                                                                                                                                                                          |
| Africa    | Tswaing<br>Crater/Pretoria<br>Salt Pan | X   | 100            | South Africa                     | 88           | 200 ka  | Scott, 1999                                                                                                                                                                                  |
| Africa    | Vankervelsvlei                         | X   | 153            | South Africa                     | 23.5         | 140 ka  | Quick et al. 2016                                                                                                                                                                            |
| Africa    | Wonderkrater                           | X   | 1100           | South Africa                     |              | 190 ka  | Scott & Thackeray 1987, Scott 1999, 2003,<br>2012; Thackeray et al. 2019                                                                                                                     |
| Asia      | Lake Biwa                              | X   | 85             | Japan [1971]                     | 200          | 0.6 Ma  | Fuji 1973, 1976, 1981, 1983, 1986a, 1986b,<br>1989; Horie 1984a, 1987, 1991                                                                                                                  |

| Continent | Record                         | Fig | Elev<br>(masl) | Location<br>[coring year] | Depth<br>(m)       | Age           | References                                                                                                                                                                                                                                                                                         |
|-----------|--------------------------------|-----|----------------|---------------------------|--------------------|---------------|----------------------------------------------------------------------------------------------------------------------------------------------------------------------------------------------------------------------------------------------------------------------------------------------------|
| Asia      | Lake Biwa                      | X   | 85             | Japan [1982-83]           | 1400               | 2.3 Ma        | Fuji 1988; Horie 1984b, 1991; Granoszewski et al. 2005, Tarasov et al. 2011                                                                                                                                                                                                                        |
| Asia      | Lake Qinghai                   |     | 3260           | China [2000]              | 8                  | 16 ka         | Zhisheng et al. 2006, Zhang et al. 2016; Liu et al. 2002                                                                                                                                                                                                                                           |
| Asia      | Lake Suigetsu SG06 continuous  | X   | 0              | Japan [2006]              | 73.4               | 150 ka        | Bronk Ramasy et al. 2012, 2020; Nakagawa et al. 2012, 2021; Schlolaut et al. 2017; Smith et al. 2013; Albert et al. 2018; Demske et al. 2013, Staff et al. 2013.                                                                                                                                   |
| Asia      | Lake Suigetsu SG12 continuous  | X   | 0              | Japan [2012]              | 41.9               | 56 ka         | Nakagawa et al. 2013,Suzuki et al. 2020                                                                                                                                                                                                                                                            |
| Asia      | Lake Suigetsu SG14             | X   | 0              | Japan [2014]              | 97.7               | 200 ka        | McLean et al. 2018, 2020; Nakagawa & Suigetsu 2006 project members 2014, Scholaut et al. 2018; <a href="http://www.suigetsu.org/publications.html">http://www.suigetsu.org/publications.html</a>                                                                                                   |
| Asia      | Lake Suigetsu SG93             | X   | 0              | Japan [1993]              | 75                 | 150 ka        | Kitagawa & van der Plicht 1998a, 1998b, 2000; Kitagawa et al. 1995; Nakagawa et al. 2002, 2003, 2005, 2006                                                                                                                                                                                         |
| Asia      | Paleolake Heqing               | X   | 2202           | SW China                  | 737                | 2.6 Ma        | Xiao et al. 2007; An et al. 2011                                                                                                                                                                                                                                                                   |
| Asia      | Shudu Lake, Hengduan Mountains |     | 3620           | China [2005]              | 3.1                | 30 ka         | Yao et al. 2017                                                                                                                                                                                                                                                                                    |
| Asia      | Zoige Basin                    | X   | 3500           | China/E Tibetan Plateau   | ??                 | 1.74 Ma       | Chen et al. 1999, Zhao et al. 2021                                                                                                                                                                                                                                                                 |
| Europe    | Füramoos                       | X   | 669            | SW Germany                | ??                 | 125 ka        | Müller et al. 2003                                                                                                                                                                                                                                                                                 |
| Europe    | Grande Pile                    | X   | 360            | France [~1975]            | 19                 | 135 ka        | Woillard 1978, 1979; Woillard & Mook 1982; De Deaulieu & Reille 1992; Helmens 2014                                                                                                                                                                                                                 |
| Europe    | Horoszk Duze                   |     | 24             | Poland                    | 15                 | 35-25ka       | Granoszewski 2003                                                                                                                                                                                                                                                                                  |
| Europe    | Ioannina                       |     | 470            | Greece [1989]             | 24                 | 25 ka         | Tzedakis 1993; Lawson et al. 2004                                                                                                                                                                                                                                                                  |
| Europe    | Lac du Bouchet                 | X   | 1208           | France                    | 20                 | 325-100 ka    | Reille et al. 1988, 1999                                                                                                                                                                                                                                                                           |
| Europe    | Lagaccione                     |     | 355            | Italy [1992]              | 49.5 (S1); 45 (S2) | 100 ka        | Magri 1999                                                                                                                                                                                                                                                                                         |
| Europe    | Lago di Vico                   |     | 510            | Italy [1992]              | 15                 | 90 ka         | Magri & Sadori 1999                                                                                                                                                                                                                                                                                |
| Europe    | Lago Grande di Monticchio      |     | 656            | Italy [1982]              | 25.7               | ~60 ka        | Watts 1985                                                                                                                                                                                                                                                                                         |
| Europe    | Lago Grande di Monticchio      |     | 656            | Italy [1990]              | 51                 | 76 ka, 102 ka | Watts et al. 1996a, 1996b                                                                                                                                                                                                                                                                          |
| Europe    | Lago Grande di Monticchio      |     | 656            | Italy [1994]              | 51                 | 76 ka, 102 ka | Huntley et al. 1999; Allen et al. 2000, 2002; Brauer et al. 2007; Martin-Puertas et al. 2014                                                                                                                                                                                                       |
| Europe    | Lake Baikal BDP-96             | X   | 455            | Russia [1996]             | ??                 | 3.1 Ma        | Colman et al. 1995, 1996; Demske et al. 2005; Horiuchi et al. 2000; Kashiwaya 2003; Khursevich et al. 2001; Williams et al. 1997, 2001; Tarasov et al. 2005a, 2007; Granoszewski et al. 2005; Prokopenko et al. 1999, 2002, 2006, 2010; Bezrukova et al. 2003. Khursevich et al. 2001, Mackay 2007 |
| Europe    | Lake Banyoles                  |     | 172            | Spain                     | 67                 | 30 ka         | Pérez-Obiol & Julià 1994; Höbig et al. 2012                                                                                                                                                                                                                                                        |

| Continent | Record                   | Fig | Elev<br>(masl) | Location<br>[coring year] | Depth<br>(m) | Age        | References                                                                                                                                                                                                                                                                                                                                                       |
|-----------|--------------------------|-----|----------------|---------------------------|--------------|------------|------------------------------------------------------------------------------------------------------------------------------------------------------------------------------------------------------------------------------------------------------------------------------------------------------------------------------------------------------------------|
| Europe    | Lake El'gygytgyn         | X   | 480            | NE Russia [2009]          | 517          | 2.8 Ma     | Brigham-Grette et al. 2006, 2013, Coletti et al. 2015, D'Anjou et al. 2013, De Wet et al. 2016, Franke et al. 2013, Koerberl et al. 2013, Lozhkin & Anderson 2013, Melles et al. 2001, 2012; Nowaczyk et al. 2013, Sauerbrey et al. 2013, Snyder et al. 2013. Wei et al. 2014, Wennrich et al. 2014, Wilkie et al. 2013, Zander & Hilgers 2013, Zhao et al. 2015 |
| Europe    | Lake El'gygytgyn PG1351  |     | 480            | NE Russia [111]           | 146          | 2.8 Ma     | Nowaczyk et al. 2002, Lozhkin et al. 2007; Melles et al. 2006, 2007, 2012                                                                                                                                                                                                                                                                                        |
| Europe    | Lake Kopais              | X   | 95             | Greece                    | 120          | 500 ka     | Okuda et al. 2001                                                                                                                                                                                                                                                                                                                                                |
| Europe    | Lake Kotokel             |     | 458            | Russia [2004]             | 7            | 15 ka      | Shichi et al. 2009; Tarasov et al. 2009                                                                                                                                                                                                                                                                                                                          |
| Europe    | Lake Ochrid              | X   | 693            | Macedonia [2011, 2013]    | 568          | 1.2 Ma     | Sulpizio et al. 2010; Wagner et al. 2009, 2014, 2019                                                                                                                                                                                                                                                                                                             |
| Europe    | Lake Ochrid-C01262       | X   | 693            | Macedonia [2011]          | 10           | 12 ka      | Lacey et al. 2014                                                                                                                                                                                                                                                                                                                                                |
| Europe    | Lake Ochrid-Co1202       | X   | 693            | Macedonia [2007]          | 15           | 136 ka     | Vogel et al. 2010                                                                                                                                                                                                                                                                                                                                                |
| Europe    | Lake Prespa-C01215       |     | 853            | Macedonia                 | 6 cores      | 131 ka     | Panagiotopoulos et al. 2013; Sulpizio et al. 2010                                                                                                                                                                                                                                                                                                                |
| Europe    | Lake Yamozero            |     | 213            | NW Russia                 | 22           | 80-14 ka   | Henriksen et al. 2008                                                                                                                                                                                                                                                                                                                                            |
| Europe    | Leffe Basin              | X   | 450            | Italy [~1950]             | ??           | 1.6 Ma     | Lona 1950, Lona & Follieri 1957, Ravazzi & Rossignol-Strick 1995                                                                                                                                                                                                                                                                                                 |
| Europe    | Les Echets               | X   | 267            | France                    | 39           | 130 ka     | De Beaulieu & Reille 1984a, 1984b, 1989; De Beaulieu et al. 1980; Helmens 2014                                                                                                                                                                                                                                                                                   |
| Europe    | Oerel                    |     | 16             | Germany [1980s]           | 19           | 61 ka      | Behre & Van der Plicht 1992                                                                                                                                                                                                                                                                                                                                      |
| Europe    | Padul Basin 15-05        |     | 726            | Spain [2015]              | 42.6         | 197 ka     | Camurea et al. 2019                                                                                                                                                                                                                                                                                                                                              |
| Europe    | Padul Basin -15-05       |     | 726            | Spain                     | 107          | 800 ka     | Ortiz et al. 2010, Torres et al. 2020                                                                                                                                                                                                                                                                                                                            |
| Europe    | Padul cores 2 and 3      |     | 726            | Spain                     | 24           | 80 ka      | Pons & Reille 1988                                                                                                                                                                                                                                                                                                                                               |
| Europe    | Padul P core IV          |     | 726            | Spain [1960s]             | 70           | >200 ka    | Florschütz et al. 1971                                                                                                                                                                                                                                                                                                                                           |
| Europe    | Praclaux Crater          | X   | ~1600          | France                    | 46           | ~125 ka    | Reille & De Beaulieu 1995, De Beaulieu et al. 2001                                                                                                                                                                                                                                                                                                               |
| Europe    | Ribains Crater           | X   | 1075           | France [1988]             | 50           | ~150 ka    | De Beaulieu & Reille 1992                                                                                                                                                                                                                                                                                                                                        |
| Europe    | Samerberg                | X   | 600            | Germany [1970, 1972]      | 37           | 140 ka     | Grüger 1979a, 1979b, 1991                                                                                                                                                                                                                                                                                                                                        |
| Europe    | Stirone Section          | X   | 695            | Italy                     | 700          | 5.1-2.2 Ma | Bertini 2003                                                                                                                                                                                                                                                                                                                                                     |
| Europe    | Stracciaccia             |     | 220            | Italy                     | 32.6         | 60 ka      | Giardini 2007                                                                                                                                                                                                                                                                                                                                                    |
| Europe    | Tenaghi Philippon        | X   | 40             | Greece [~1964]            | 195          | 1.35 Ma    | Van der Hammen et al. 1965, 1971; Wijmstra 1969; Wijmstra & Smit 1976; Wijmstra & Groenhardt 1983; Van der Wiel & Wijmstra 1987a, 1987b; Mommersteeg et al. 1995; Tzedakis et al. 2001, 2003, 2006; Gasse et al. 2017                                                                                                                                            |
| Europe    | Tenaghi Philippon        | X   | 40             | Greece [2005]             | 1-60         | 250 ka     | Pross et al. 2007; Fletcher et al. 2013                                                                                                                                                                                                                                                                                                                          |
| Europe    | Tenaghi Philippon        | X   | 40             | Greece [2009]             | 50-200       | 250 ka     | Pross et al. 2007, 2015; Milner et al. 2012, 2013                                                                                                                                                                                                                                                                                                                |
| Europe    | Thalgut, Alpine Foreland |     |                | Switzerland               | ??           | ??? ka     | Schlüchter 1989                                                                                                                                                                                                                                                                                                                                                  |
| Europe    | Valle de Castiglione     | X   | 44             | Italy [1980s]             | 88           | 250 ka     | Follieri et al. 1988, 1989, 1998; Fletcher et al. 2010                                                                                                                                                                                                                                                                                                           |

| Continent        | Record                                | Fig | Elev<br>(masl) | Location<br>[coring year] | Depth<br>(m) | Age                           | References                                                                                                                                                      |
|------------------|---------------------------------------|-----|----------------|---------------------------|--------------|-------------------------------|-----------------------------------------------------------------------------------------------------------------------------------------------------------------|
| Europe           | Velay Plateau                         | X   | 1040           | France [1988]             | 50           | ~160 ka                       | De Beaulieu & Reille 1992, Reille et al. 2000                                                                                                                   |
| Europe           | Xinias                                |     | 500            | Greece                    | ??           | 18 ka                         | Tarasov et al. 1998                                                                                                                                             |
| Latin<br>America | Arroyo Las<br>Brusquitas<br>Profile 3 |     | 4              | Argentina                 | 1            | 38 ka                         | Vilanova et al. 2006                                                                                                                                            |
| Latin<br>America | Cala Conto                            |     | 2700           | Bolivia                   | 2.5          | 36 ka                         | Graf 1981; Graf 1992                                                                                                                                            |
| Latin<br>America | Cambara do Sul                        |     | 1040           | Brazil                    | 2.1          | 43 ka                         | Behling et al. 2005; Behling & Pillar 2007;<br>Bauermann & Behling 2009                                                                                         |
| Latin<br>America | Carajas CCS2 1                        |     | 700            | Brazil                    | ??           | 50 ka                         | Absy et al. 1991                                                                                                                                                |
| Latin<br>America | Cariaco basin<br>MD 03-2622           |     | marine         | Venezuela                 |              | 68 ka                         | Gonzalez et al. 2008; Gonzalez & Dupont 2009                                                                                                                    |
| Latin<br>America | Catas Altas                           |     | 755            | Brazil                    | 2.48         | 48 ka                         | Behling & Lichte 1997; Behling 1998                                                                                                                             |
| Latin<br>America | Ciama 2                               |     | 860            | Brazil                    | 1.7          | 38 ka                         | De Oliveira et al. 2012; Jeske-Pieruschka et al.<br>2013                                                                                                        |
| Latin<br>America | Colônia Basin                         | X   | 700            | Brasil                    | 14           | 180 ka                        | Rodríguez-Zorro et al. 2020                                                                                                                                     |
| Latin<br>America | Coloñia CO3 -1                        |     | 900            | Brasil                    | 7.8          | 100 ka                        | Ledru et al. 2005; 2009                                                                                                                                         |
| Latin<br>America | CUX                                   |     | 2550           | Colombia<br>[1956]        | 12           | 35 ka                         | Van der Hammen & González 1960, 1963                                                                                                                            |
| Latin<br>America | CUY                                   |     | 2550           | Colombia<br>[1957]        | 195          | mid &<br>upper<br>Pleistocene | Van der Hammen 1968, 1981; 1971                                                                                                                                 |
| Latin<br>America | El Valle                              | X   | 500            | Panama                    | 55           | 150 ka                        | Bush & Colinvaux 1990                                                                                                                                           |
| Latin<br>America | Funza09<br>composite                  |     | 2550           | Colombia                  | 586 mcd      | 586 mcd                       | Torres et al. 2013; Hooghiemstra & Flantua<br>2019; Hooghiemstra & Torres in prep.                                                                              |
| Latin<br>America | Funza-1                               | X   | 2550           | Colombia<br>[1973]        | 357-2        | ~1.8 Ma                       | Hooghiemstra 1984, 1989; Andriessen et al.<br>1993; Hooghiemstra et al. 1993; Hooghiemstra<br>& Berrio 2007; Torres et al. 2013;<br>Hooghiemstra & Flantua 2018 |
| Latin<br>America | Funza-2 pollen                        | X   | 2550           | Colombia<br>[1987]        | 586-2        | 2.25 Ma                       | Torres 2005; Torres et al. 2013; Torres &<br>Hooghiemstra in prep.                                                                                              |
| Latin<br>America | Funza-2<br>sediments                  | X   | 2550           | Colombia<br>[1987]        | 586-2        | ~2.5 Ma                       | Torres 2005; Torres et al. 2013                                                                                                                                 |
| Latin<br>America | Funza-2A                              | X   | 2550           | Colombia<br>[1987]        | 54-2         | 140 ka                        | Mommersteeg & Hooghiemstra 1998b, 1998c                                                                                                                         |
| Latin<br>America | Fúquene-1                             | X   | 2540           | Colombia<br>[~1970]       | 9.8          | ~25 ka                        | Van Geel & Van der Hammen 1973                                                                                                                                  |
| Latin<br>America | Fúquene-10                            |     | 2540           | Colombia<br>[2002]        | 58-2         | see Fúquene-<br>9             | Groot et al. 2011                                                                                                                                               |
| Latin<br>America | Fúquene-2                             | X   | 2540           | Colombia<br>[~1970]       | 12           | 35 ka                         | Van Geel & Van der Hammen 1973                                                                                                                                  |
| Latin<br>America | Fúquene-3                             | X   | 2540           | Colombia<br>[1970s]       | 43           | ~120 ka                       | Van der Hammen & Hooghiemstra 2003                                                                                                                              |
| Latin<br>America | Fúquene-7&4                           | X   | 2540           | Colombia<br>[1994]        | 18 mcd       | 88 ka                         | Mommersteeg & Hooghiemstra 1998a, 1998c,<br>1998d                                                                                                               |
| Latin<br>America | Fúquene-8                             | X   | 2540           | Colombia<br>[2002]        | 58-2         | see Fúquene-<br>9             | used for teaching                                                                                                                                               |
| Latin<br>America | Fúquene-9                             | X   | 2540           | Colombia<br>[2002]        | 58-2         | see Fúquene-<br>9             | Groot et al. 2011                                                                                                                                               |

| Continent     | Record                      | Fig | Elev<br>(masl) | Location<br>[coring year] | Depth<br>(m) | Age       | References                                                                                                                            |
|---------------|-----------------------------|-----|----------------|---------------------------|--------------|-----------|---------------------------------------------------------------------------------------------------------------------------------------|
| Latin America | Fúquene9C composite         |     | 2550           | Colombia                  | 58-2         | 284-27 ka | Groot et al. 2011, 2013, 2014; Bogotá et al. 2011a; 2011b, 2015; Vriend et al. 2012; Flantua et al. 2019; Hooghiemstra & Flantua 2019 |
| Latin America | Ilha Marajo TSM4/8          |     | 0              | Brazil                    | 16/18        | 45 ka     | Castro 2010; Miranda 2010; Rossetti et al. 2012; Castro et al. 2013                                                                   |
| Latin America | Isla Tenglo                 |     | 0              | Chile                     | 2.22         | 45 ka     | Villagrán et al. 2004                                                                                                                 |
| Latin America | Jalapasquillo II            |     | 2400           | Mexico                    | 19           | 35 ka     | Straka & Ohngemach 1986                                                                                                               |
| Latin America | Katira - Rondonia           |     | 80             | Brazil                    | 20           | 50 ka     | Van der Hammen & Absy 1994; Absy & Van der Hammen 1976; Van der Hammen 1974                                                           |
| Latin America | La Chonta                   |     | 2310           | Costa Rica                | 11           | 80 ka     | Hooghiemstra et al. 1992                                                                                                              |
| Latin America | Lachner bog                 |     | 2400           | Costa Rica                | ??           | 36 ka     | Martin 1964; Leyden 1995                                                                                                              |
| Latin America | Lago Cuitzeo                |     | 1800           | Mexico                    | 27.4         | 120 ka    | Israde-Alcantara et al. 2010                                                                                                          |
| Latin America | Lago Dragao                 |     | 350            | Brazil                    | 1            | 44 ka     | Colinvaux et al. 2000; Bush et al. 2004a; Bush et al. 2002                                                                            |
| Latin America | Lago Fagnano                |     | 80             | Argentina                 | 3.5          | 58 ka     | Heusser 1994; Bujalesky 1997; Heusser 1994b                                                                                           |
| Latin America | Lago Quexil Core 80-1       |     | 110            | Guatemala                 | 19.6         | 36 ka     | Leyden et al. 1993; Leyden 1994; Leyden 1984; Leyden 2002; Huang et al. 2001                                                          |
| Latin America | Lago Verde                  |     | 350            | Brazil                    | 4.5          | 55 ka     | Colinvaux et al. 2000; Bush et al. 2004a; Bush et al. 2002                                                                            |
| Latin America | Lagoa (da) Pata I           |     | 350            | Brazil                    | 6.5          | 40 ka     | Colinvaux et al. 1996a; Colinvaux et al. 2000; Bush et al. 2002; Bush et al. 2004a                                                    |
| Latin America | Lagoa (da) Pata II          |     | 350            | Brazil                    | 2.9          | 54 ka     | D'Apolito et al. 2013                                                                                                                 |
| Latin America | Lagoa Campestre de Salitre  |     | 970            | Brazil                    | 5.5          | 66 ka     | Ledru 1992, 1993; Ledru et al. 1994, 1996                                                                                             |
| Latin America | Lagoa das Patas             |     | 300            | Brazil                    | UNKN         | 42 ka     | De Oliveira 1992                                                                                                                      |
| Latin America | Laguna Bella Vista A        |     | 600            | Bolivia                   | 2.8          | 51 ka     | Mayle et al. 2000; Burbridge et al. 2004                                                                                              |
| Latin America | Laguna Chaplin A            |     | 600            | Bolivia                   | 3            | 50 ka     | Mayle et al. 2000; Burbridge et al. 2004; Mayle et al. 2007                                                                           |
| Latin America | Laguna Junín                |     | 4100           | Peru                      | 0.7          | 36 ka     | Hansen et al. 1984, 1995                                                                                                              |
| Latin America | Laguna La Gaiba             |     |                | Brazil                    | 5.5          | 45 ka     | Whitney et al. 2012                                                                                                                   |
| Latin America | Laguna La Gaiba LLG1a       |     | 100            | Bolivia                   | 5.6          | 36 ka     | Whitney et al. 2014                                                                                                                   |
| Latin America | Laguna Potrok Aike          |     |                | Argentina                 | 513/106      | 50 ka     | Zolitschka et al. 2006                                                                                                                |
| Latin America | Laguna Seca San Felipe SF-2 |     | 400            | Mexico                    | 7.4          | 44 ka     | Lozano-Garcia et al. 2002                                                                                                             |
| Latin America | Lake Alta Babicora AB/94-3  |     | 1540           | Mexico                    | 4.7          | 65 ka     | Metcalf 1997; Huang et al. 2001; Metcalfe et al. 2002                                                                                 |
| Latin America | Lake Consuelo               |     | 1400           | Peru                      | 8.8          | 46 ka     | Bush et al. 2004; Urrego et al. 2010                                                                                                  |
| Latin America | Lake Patzcuaro              |     | 2044           | Mexico                    | 15.2         | 42 ka     | Watts & Bradbury 1982; Bradbury 2000; Mcandrews 1988                                                                                  |

| Continent     | Record                   | Fig | Elev<br>(masl) | Location<br>[coring year] | Depth<br>(m) | Age       | References                                                                                    |
|---------------|--------------------------|-----|----------------|---------------------------|--------------|-----------|-----------------------------------------------------------------------------------------------|
| Latin America | Lake Petén-Itzá          |     | 200            | Guatemala                 | 75.9         | 85 ka     | Hodell et al. 2008                                                                            |
| Latin America | Lake Siberia 93-1        |     | 2920           | Bolivia                   | 7.6          | 40 ka     | Mourguiart & Ledru 2003                                                                       |
| Latin America | Lake Tecocomulco Core TA |     | 2500           | Mexico                    | 5            | 50 ka     | Caballero et al. 1999                                                                         |
| Latin America | Lake Texcoco - TXB       |     | 2330           | Mexico                    | 10.8         | 35 ka     | Lozano-Garcia & Ortega-Guerrero 1998                                                          |
| Latin America | Lake Titicaca            | X   | 3810           | Peru-Bolivia              | 11           | 21(27) ka | Paduano et al. 2003, Fritz et al. 2004, 2007, 2010, 2012                                      |
| Latin America | Lake Titicaca LT01-3A    | X   | 3810           | Peru-Bolivia              | 120          | 370 ka    | Hanselman et al. 2005, 2011; Gosling et al. 2008                                              |
| Latin America | Lusitania                |     | 1500           | Colombia                  | 5            | 39 ka     | Montsalve 1985                                                                                |
| Latin America | Maicuru                  |     | 550            | Brazil                    | UNKN         | 40 ka     | Colinvaux & De Oliviera 2000                                                                  |
| Latin America | Malinche Volcan 2        |     | 3000           | Mexico                    | 2.8          | 35 ka     | Heine 1988; Ohngemach & Straka 1983                                                           |
| Latin America | Maxus Site 5             |     |                | Ecuador                   |              | 71 ka     | Athens 1997; Athens & Ward 1999                                                               |
| Latin America | Nevado Sajama            |     | 6540           | Bolivia [1997]            |              | 25 ka     | Reese et al. 2017                                                                             |
| Latin America | Ogle Bridge              |     | 0              | Guyana                    | 30           | 45 ka     | Wijmstra & Van der Hammen 1966; Van der Hammen 1961; Van der Hammen, 1963                     |
| Latin America | Pantano de Genagra       |     | 1750           | Colombia                  | 8.3          | 52 ka     | Behling et al. 1998; Wille 2001; Wille et al. 2001                                            |
| Latin America | Petén Itzá               |     | 110            | Guatemala [2006]          | 75           | 86 ka     | Correa-Metrio et al. 2012a, 2012b, 2012c; Escobar et al. 2012, Hodell et al. 2006, 2008, 2012 |
| Latin America | Piagua                   |     | 1700           | Colombia                  | 6            | 41 ka     | Wille et al. 2001                                                                             |
| Latin America | Pitalito PIT 11          |     | 1300           | Colombia                  | 12.9         | 68 ka     | Bakker 1990; Wille et al. 2001                                                                |
| Latin America | Ponta Grossa             |     | 975            | Brazil                    |              | 40 ka     | Fernandes et al. 2003                                                                         |
| Latin America | Punta Penas              |     | 50             | Chile                     | 4.8          | 42 ka     | Heusser 1981                                                                                  |
| Latin America | Salar de Uyuni           |     | 3653           | Bolivia                   | 78.8         | 108 ka    | Baker et al. 2001; Fritz et al. 2004; Chepstow-Lusty et al. 2005                              |
| Latin America | Serra Sul dos Carajas    |     | 740            | Brazil                    | 4.7          | 50 ka     | Hermanowski et al. 2012                                                                       |
| Latin America | Tagua Tagua 10.7m        |     | 200            | Chile                     | 3.2          | 50 ka     | Heusser 1983; Heusser 1990                                                                    |
| Latin America | Tagua Tagua 1105B        |     | 200            | Chile                     | 8.3          | 40 ka     | Valero et al. 2005                                                                            |
| Latin America | Taiquemo                 |     | 50             | Chile                     |              | 46 ka     | Heusser 1981; Heusser & Flint 1977; Heusser 1990                                              |
| Latin America | Taiquemo HE 94-2B        |     | 170            | Chile                     | 6.5          | 56 ka     | Heusser et al. 1999; Heusser & Heusser 2006                                                   |
| Latin America | Talquemó                 |     | 130            | Chile                     |              | 43 ka     | Heusser & Flint 1977; Heusser 1990                                                            |
| Latin America | Tarragona                |     | 2560           | Colombia [1974?]          | 35           | ~0.5 ka   | Dueñas 1979                                                                                   |
| Latin America | Volta Velha              |     | 0              | Brazil                    | 6            | 36 ka     | Behling & Negrelle 2001                                                                       |

| Continent     | Record              | Fig | Elev<br>(masl) | Location<br>[coring year]           | Depth<br>(m) | Age        | References                                                                                                                                                                     |
|---------------|---------------------|-----|----------------|-------------------------------------|--------------|------------|--------------------------------------------------------------------------------------------------------------------------------------------------------------------------------|
| Latin America | Wasa Mayu           |     | 2720           | Bolivia                             | 2.5          | 100 ka     | Graf 1992                                                                                                                                                                      |
| Latin America | Zacapu Basin        |     | 1970           | Mexico                              | 10.9         | 50 ka      | Correa-Metrio et al. 2012                                                                                                                                                      |
| Latin America | Zacapu Cantabria CA |     | 1973           | Mexico                              | 10.9         | 50 ka      | Correa-Metrio et al. 2012; Ortega et al. 2002                                                                                                                                  |
| Middle East   | Dead Sea-5017-1     | X   | -428           | Israel [2010-11]                    | 455          | 220 ka     | Heim et al. 1997; Litt et al. 2012; Migowski et al. 2006; Neugebauer et al. 2014; Stein et al. 1997; Stein 2001, 2014; Stein et al. 2011, Waldmann et al. 2017                 |
| Middle East   | Hula (Huley) Basin  |     | 70             | Israel [~1975]                      | 58           | 32 (70 ka) | Horowitz 1979; Van Zeist & Bottema 1991; Weinstein-Evron 1983; Kafri & Hotowitz 2003                                                                                           |
| Middle East   | Issyk Kul           | X   | 1607           | Kyrgyzstan                          | ??           | ~2 Ma      | Oberhänsli & Molnar 2012, Ricketts et al. 2001                                                                                                                                 |
| Middle East   | Jordan Rift Valley  | X   |                | Israel                              |              | 3.5 Ma     | Horowitz 1989                                                                                                                                                                  |
| Middle East   | Lake Van            | X   | 1648           | Turkey [~1974]                      | ??           | ?? ka      | Van Zeist & Woldring 1978                                                                                                                                                      |
| Middle East   | Lake Van            | X   | 1648           | Turkey [2010]                       | 219          | 250 ka     | Litt & Anselmetti 2014; Litt et al. 2014; Stockhecke et al. 2014; Pickarski & Litt 2017                                                                                        |
| Middle East   | Lake Yammoûneh      | X   | 1360           | Lebanon [2004]                      | 36           | 250 ka     | Develle et al. 2011; Gasse et al. 2015                                                                                                                                         |
| Middle East   | Lake Zeribar 63-J   |     | 1285           | Iran [1960]                         | 25.4         | 17 ka      | Van Zeist & Wright 1963; Van Zeist & Bottema 1977, 1991                                                                                                                        |
| Middle East   | Lake Zeribar 70-A   |     | 1285           | Iran [1963]                         | 40.3         | 40 ka      | Van Zeist & Bottema 1977; Wasilkova 1967; Snyder et al. 2001, Wasylikowa et al. 2006, 2008                                                                                     |
| Middle East   | Soreq Cave          |     | 400            | Israel                              |              | ?? ka      | Bar-Matthews et al. 1997, 1999, 2003                                                                                                                                           |
| Oceania       | Caledonia Fen       | X   | 1300           | SE Australia                        | ??           | 130 ka     | Kershaw et al. 2010                                                                                                                                                            |
| Oceania       | Lake George         | X   | 600            | SE Australia                        | ??           | 125 ka     | Sing & Geissler 1985, Zondervan 2016                                                                                                                                           |
| Oceania       | Lake Selina         | X   | 516            | SE Australia                        | 4            | 130 ka     | Colhoun et al. 1999                                                                                                                                                            |
| Oceania       | Lake Tangonge       |     | 7              | New Zealand                         |              | d70 ka     | Elliot et al. 2005                                                                                                                                                             |
| Oceania       | Lake Wangoom        | X   | 100            | Victoria, SE Australia              | ??           | 210 ka     | Harle et al. 2002                                                                                                                                                              |
| Oceania       | Lynch Crater        | X   | 760            | NE-Queensland [2004]                | 60           | 230 ka     | Kershaw et al. 2007                                                                                                                                                            |
| Oceania       | Lynch Crater        |     | 760            | NE-Queensland [1971-72, 1973, 1978] | 20           | 60 ka      | Kershaw 1974, 1976, 1983, 1986; Turney et al. 2001                                                                                                                             |
| Oceania       | MD03-2607           |     | -865           | S-Australia [2003]                  | (33)13.5     | 125 ka     | De Deckker et al., 2021                                                                                                                                                        |
| Oceania       | Okarito Pakihi      | X   | 70             | New Zealand                         | 10           | 150 ka     | Van der Goes et al. 2005                                                                                                                                                       |
| Oceania       | Rano Aroi           |     |                | Easter Island                       | ??           | 70 ka      | Margalef et al. 2013, 2014                                                                                                                                                     |
| Oceania       | Rano Aroui          |     | 425            | Chile                               | 11.5         | 38 ka      | Flenley & King 1984                                                                                                                                                            |
| Oceania       | Rano Raraku Bore 3  |     | 75             | Chile                               | 12           | 36 ka      | Flenley & King 1984; Flenley et al. 1991                                                                                                                                       |
| USA           | Bear Lake           | X   | 1805           | Utah-Idaho, USA                     | ??           | 250 ka     | Bright et al. 2006, Colman 2006, Colman et al. 2006, 2009, Dean 2009, Donner 2009, Heil et al. 2009, Jiménez-Moreno et al. 2007. Kaufman et al. 2009, Rosenbaum & Kaufman 2009 |
| USA           | Carp Lake           | X   | 714            | Washington, USA                     | ??           | 125 ka     | Whitlock et al. 2000                                                                                                                                                           |

| Continent | Record          | Fig | Elev<br>(masl) | Location<br>[coring year] | Depth<br>(m)             | Age            | References                                                                                                |
|-----------|-----------------|-----|----------------|---------------------------|--------------------------|----------------|-----------------------------------------------------------------------------------------------------------|
| USA       | Clear Lake-4    | X   | 404            | California, USA<br>[1973] | 115                      | 130 ka         | Adam et al 1981                                                                                           |
| USA       | Devils Hole     |     | 730            | Nevada, USA               | 36-cm<br>calcite<br>core | 500 ka         | Winograd et al. 1992.                                                                                     |
| USA       | Great Salt Lake | X   | 1280           | Utah, USA                 | 628                      | 1.5 Ma         | Davis 1998, Eardley & Gvodetsky 1960,<br>Kowalewska & Cohen 1998                                          |
| USA       | Humptulips Mire |     | 110            | Washington,<br>USA        | 7.7                      | 75 ka          | Heusser et al. 1999                                                                                       |
| USA       | Lake Bonneville |     | 1550           | Utah, USA                 | ??                       | 45 ka          | Oviatt 1997                                                                                               |
| USA       | Lake Cochise    |     | 1260           | Arizona, USA              | 42                       | ?? ka          | Martin 1963                                                                                               |
| USA       | Lake Tulane     |     | 35             | Florida, USA              | ??                       | 50 ka          | Grimm et al. 1993, 2006                                                                                   |
| USA       | Owens Lake      | X   | 1067           | California, USA           |                          | 180 ka         | Bradbury 1997, Litwin et al. 1997, Bradbury &<br>Forester 2002, Rosenbaum et al. 2000,<br>Woolfenden 2003 |
| USA       | Potato Lake     |     | 2205           | Arizona, USA              |                          | 35 ka          | Anderson 1993                                                                                             |
| USA       | Stetson Pit     | X   |                | North Carolina,<br>USA    | 34                       | ~0.8-1.3<br>Ma | York et al. 1989                                                                                          |
| USA       | Summer Lake     | X   | 1287           | Oregon, USA               | core &<br>outcrop        | 250-5 ka       | Cohen et al. 2000                                                                                         |
