# Supplementary material for: 60 years of scientific deep drilling in Colombia: the north Andean guide to the Quaternary
Source: Copernicus journal article supplement (doi:10.5194/sd-30-1-2022), 2022-02-25
Supplement: Supplementary file 4 [file sd-30-1-2022-supplement.zip]

**Supplement 2: List of references for Table S1.**

- Absy, M.L., Cleef, A.M., Fournier, M.L., Servant, M., Sifeddine, A., Ferreira da Silva, M., Soubies, F., Suguio, K., Turcq, B., and Van der Hammen, T.: Mise en évidence de quatre phases d'ouverture de la forêt dense dans le sud-est de l'Amazonie au cours de 60,000 dernières années. Première comparaison avec d'autres régions tropicales. *Comp. Rend. Acad. Sci.* 312, 673-678, fdi:31917, 1991.
- Adam, D.P.: Palynology of two Upper Quaternary cores from Clear Lake, Lake County, California. *US Geol. Survey Prof. Pap.*, 1363, 1-86, <https://doi.org/10.3133/pp1363>, 1988.
- Adam, D.P., Sarna-Wojcicki, A.M., Rieck, H.J., Bradbury, J.P., Dean, W.E., and Forester, R.M.: Tule Lake, California: the last 3 million years. *Palaeogeogr. Palaeoclimatol. Palaeoecol.*, 73, 89-103, [https://doi.org/10.1016/0031-0182\(89\)90134-X](https://doi.org/10.1016/0031-0182(89)90134-X), 1989.
- Adam, D.P., Sims, J.D., and Throckmorton, C.K.: 130,000-yr continuous pollen record from Clear Lake, Lake County, California. *Geology*, 9, 373-377, doi: 10.1130/0091-7613(1981)9<373:YCPRFC>2.0.CO;2, 1981.
- Albert, P.G., Smith, V.C., Suzuki, T., Tomlinson, E.L., Nakagawa, T., McLean, D., Yamada, M., Staff, R.A., Scholaut, G., Takemura, K., Nagahashi, Y., Kimura, J., and Suigetsu 2006 Project Members: Constraints on the frequency and dispersal of explosive eruptions at Sambe and Daisen volcanoes (south-west Japan Arc) from the distal Lake Suigetsu record (SG06 core). *Earth-Sci. Rev.*, 185, 1004-1028, <https://doi.org/10.1016/j.earscirev.2018.07.003>, 2018.
- Allen, J.R.M., and Huntley, B.: Last Interglacial palaeovegetation, palaeoenvironments and chronology: a new record from Lago Grande di Monticchio, southern Italy. *Quat. Sci. Rev.*, 28, 1521-1538, <https://doi.org/10.1016/j.quascirev.2009.02.013>, 2009.
- Allen, J.R.M., Watts, W.A., and Huntley, B.: Weichselian palynostratigraphy, palaeovegetation and paleoenvironment; the record from Lago Grande di Monticchio, southern Italy. *Quat. Intern.*, 73-74, 91-110, doi:10.1016/S1040-6182(00)00067-7, 2000.
- Allen, J.R.M., Watts, W.A., McGee E., and Huntley, B.: Holocene environmental variability; the record from Lago Grande di Monticchio, Italy. *Quat. Intern.*, 88, 69-80, [https://doi.org/10.1016/S1040-6182\(01\)00074-X](https://doi.org/10.1016/S1040-6182(01)00074-X), 2002.
- Amaral, P.G.C., Vincens, A., Guiot, J., Buchet, G., Deschamps, P., and Doumnang, J.C.: Palynological evidence for gradual vegetation and climate changes during the African Humid Period termination at 13 N from a Mega-Lake Chad sedimentary sequence. *Clim. Past*, 9, 223-241, <https://doi.org/10.5194/cp-9-223-2013>, 2013.
- Anderson, R.S.: A 35,000 year vegetation and climate history from Potato Lake, Mogollon Rim, Arizona. *Quat. Res.*, 40, 351-359, doi: <https://doi.org/10.1006/qres.1993.1088>, 1993.
- Andreev, A.A., Tarasov, P.E., Wennrich, V., Raschke, E., Herzschuh, U., Nowaczyk, N.R., Brigham-Grette, J., and Melles, M.: Late Pliocene and Early Pleistocene vegetation history of northeastern Russian Arctic inferred from the Lake El'gygytgyn pollen record: *Clim. Past*, 10, 1017-1039, doi: 10.5194/cp-10-1017-2014, 2014.
- Andriessen, P.A.M., Helmens, K.F., Hooghiemstra, H., Riezebos, P.A., and Van der Hammen, T.: Absolute chronology of the Pliocene-Quaternary sediment sequence of the Bogotá area, Colombia. *Quat. Sci. Rev.*, 12, 483-501, [https://doi.org/10.1016/0277-3791\(93\)90066-U](https://doi.org/10.1016/0277-3791(93)90066-U), 1993.
- Athens, J.S.: Paleoambiente del Oriente ecuatoriano: resultados preliminares de columnas de sedimentos procedentes de humedales. *Fronteras de Investigación*, 1, 15-32, 1997.
- Athens, J.S., and Ward, J.V.: The late Quaternary of the western Amazon: climate, vegetation, and humans. *Antiquity*, 73, 287-302, doi: 10.1017/S0003598X00088256], 1999.
- Baker, P.A., Rigsby, C.A., Seltzer, G.O., Fritz, S.C., Lowenstein, T.K., Bacher, N.P., and Veliz, C.: Tropical climate changes at millennial and orbital timescales on the Bolivian Altiplano. *Nature*, 409, 698-701, doi: <https://doi.org/10.1038/35055524>, 2001.
- Bakker, J.: Tectonic and climatic controls on late Quaternary sedimentary processes in a neotectonic intramontane basin (the Pitalito Basin, South Colombia). Ph.D. dissertation, Agricultural University Wageningen, Wageningen, The Netherlands, 1-160, 1990.
- Bar-Matthews, M., Ayalon, A., and Kaufman, A.: Late Quaternary paleoclimate in the eastern Mediterranean region from stable isotope analysis of speleothems at Soreq Cave, Israel. *Quat. Res.*, 47, 155-168, <https://doi.org/10.1006/qres.1997.1883>, 1997.

- Bar-Matthews, M., Ayalon, A., Kaufman, A., and Wasserburg, G.J.: The Eastern Mediterranean paleoclimate as a reflection of regional events: Soreq Cave, Israel. *Earth Planet. Sci. Let.*, 166, 85-95, [https://doi.org/10.1016/S0012-821X\(98\)00275-1](https://doi.org/10.1016/S0012-821X(98)00275-1), 1999.
- Bar-Matthews, M., Ayalon, A., Gilmour, M., Matthews, A., and Hawkesworth, C.J.: Sea-land oxygen isotope relationships from planktonic foraminifera and speleothems in the eastern Mediterranean region and their implications for paleorainfall during interglacial intervals. *Geochim. Cosmochim. Acta*, 67, 3181-3199, [https://doi.org/10.1016/S0016-7037\(02\)01031-1](https://doi.org/10.1016/S0016-7037(02)01031-1), 2003.
- Bauermann, S.G., and Behling, H.: Dinamica paleovegetacional da floresta com Araucária a partir do final do Pleistoceno: o que mostra a palinologia.. In: Fonseca, C.R., Souza, A.F., Leal-Zanchet., A.M., Dutra., T.L., Backes, A., and Ganade, G. (eds.) *Floresta com Araucária: ecologia, conservacao e desenvolvimento sustentável*, Ribeirao Preto, Editora Holos, Brazil, pp. 35-38, 2009.
- Behling, H. Late Quaternary vegetational and climatic changes in Brazil. *Rev. Palaeobot. Palynol.*, 99, 143-156, [https://doi.org/10.1016/S0034-6667\(97\)00044-4](https://doi.org/10.1016/S0034-6667(97)00044-4), 1998.
- Behling, H., and Lichte, M.: Evidence of dry and cold climatic conditions at glacial times in tropical southeastern Brazil. *Quat. Res.*, doi:10.1006/QRES.1997.1932, 48, 348-358, 1997.
- Behling, H., and Negrelle, R.R.: Tropical rain forest and climate dynamics of the Atlantic Lowland, southern Brazil, during the late Quaternary. *Quat. Res.*, 56, 383-389, doi:10.1006/qres.2001.2264, 2001.
- Behling, H., Hooghiemstra, H., and Negret, A.J.: Late Quaternary vegetation and climate change in the Popayán region, southern Colombian Andes. *J. Quat. Sci.*, 13, 43-53, doi:10.1002/(SICI)1099-1417(199801/02)13:1<43::AID-JQS348>3.0.CO;2-G, 1998.
- Behling, H., Pillar, V.D., Orlóci, L., Bauermann, S.G.: Late Quaternary Araucaria forest, grassland (campos), fire and climate dynamics, studied by high-resolution pollen, charcoal and multivariate analysis of the Cambará do Sul core in southern Brazil. *Palaeogeogr. Palaeoclimatol. Palaeoecol.*, 203, 277-297. doi:10.1016/S0031-0182(03)00687-4, 2005.
- Behre, K.-E., and Van der Plicht, J.: Towards an absolute chronology for the last glacial period in Europe: radiocarbon dates from Oerel, northern Germany. *Veget. Hist. Archaeobot.*, 1, 111-117, <https://doi.org/10.1007/BF00206091>, 1992.
- Benson, L.V., Lund, S.P., Smoot, J.P., Rhode, D.E., Spencer, R.J., Verosub, K.L., Louderback, L.A., Johnson, C.A., Rye, R.O., and Negrini, R.M.: The rise and fall of lake Bonneville between 45 and 1.5 ka. *Quat. Intern.*, 235, 57-69, <https://doi.org/10.1016/j.quaint.2010.12.014>, 2011.
- Berke, M.A., Johnson, T.C., Werne, J.P., Grice, K., Schouten, S., and Sinninghe Damsté, J.S.: Molecular records of climate variability and vegetation response since the Late Pleistocene in the Lake Victoria basin, East Africa: *Quat. Sci. Rev.*, 55, 59-74, doi: 10.1016/j.quascirev.2012.08.014, 2012.
- Bertini, A.: Pliocene climate cycles and altitudinal forest development from 2.7 Ma in the northern Apennines (Italy); evidence from the pollen record of the Stirone section (~5.1 to ~2.2 Ma). *Geobios*, 34, 253-265, [https://doi.org/10.1016/S0016-6995\(01\)80074-7](https://doi.org/10.1016/S0016-6995(01)80074-7), 2003.
- Bertoldi, R., Rio, D., and Thunell, R.: Pliocene-Pleistocene vegetational and climatic evolution of the south-central Mediterranean. *Palaeogeogr. Palaeoclimatol. Palaeoecol.*, 72, 263-275, [https://doi.org/10.1016/0031-0182\(89\)90146-6](https://doi.org/10.1016/0031-0182(89)90146-6), 1989.
- Bezrukova, E.V., Kulagina, N.V., Letunova, P.P., Karabanov, E.B., Williams, D.F., Kuzmin, M.I., Krapivina, S.M., Vershinin, K.E., and Shestakova, O.N.: Pliocene-Quaternary vegetation and climate history of the Lake Baikal area, Eastern Siberia. In: Kashiwaya, K. (ed.), *Long continental records from Lake Baikal*. Springer, Japan, 2003.
- Beug, H.-J., and Dehm, R.: Das Riss/Würm-Interglazial von Zeifen, Landkreis Laufen a.d. Salzach, Bayer. Akad. Wissensch. Mathem. Naturwissensch. Kl., N.F., 151, 460-75, LC: 72349267, OCLC: (OCoLC)00884594, 1972.
- Beug, H.-J.: Vegetationsgeschichtliche Untersuchungen am Riss/Würm-Interglazial von Eurach am Starnberger See/Oberbayern. *Geol. Bavarica*, 80, 91-106, 1979.

- Beuning, K.R.M., Talbot, M.R., and Kelts, K.: A revised 30,000-year paleoclimatic and paleohydrologic history of Lake Albert, East Africa: *Palaeogeogr. Palaeoclimatol. Palaeoecol.*, 136, 259–279, doi: 10.1016/S0031-0182(97)00034-5, 1997.
- Beuning, K.R.M., Talbot, M.R., Livingstone, D.A., and Schmukler, G.: Sensitivity of carbon isotopic proxies to paleoclimatic forcing: a case study from Lake Bosumtwi, Ghana over the last 32,000 years. *Glob. Biogeochem. Cycl.*, 17, 1-32, <https://doi.org/10.1029/2003GB002072>, 2003.
- Beuning, K.R.M., Zimmerman, K.A., Ivory, S.J., and Cohen, A.S.: Vegetation response to glacial-interglacial climate variability near Lake Malawi in the southern African tropics. *Palaeogeogr. Palaeoclimatol. Palaeoecol.*, 303, 81–92, doi: 10.1016/j.palaeo.2010.01.025, 2011.
- Bigelow, N., H.: Pollen records, late Pleistocene, northern North America. In: Elias, S.A. (ed.), *Encyclopedia of Quaternary Science*, Vol. 4, pp. 2633-2648. Elsevier, Amsterdam, 2007.
- Bogotá-A., R.G., Groot, M.H.M., Hooghiemstra, H., Lourens, L.J., Van der Linden, M., and Berrio, J.C.: Rapid climate change from north Andean Lake Fúquene pollen records driven by obliquity: implications for a basin-wide biostratigraphic zonation. *Quat. Sci. Rev.*, 30, 3321-3337, doi: 10.1016/j.quascirev.2011.08.003, 2011a.
- Bogotá, A., R.G., Gaviria, S., Rincón-Martínez, D., Sarmiento, G., Hooghiemstra, H., Berrio, J.C., Groot, M.H.M., Verstraten, J.M., and Jansen, B.: Geochemical basin dynamics related to its sedimentary, vegetational and climatic histories; a case study from the Fúquene Basin, Colombian Andes. In: Bogotá-Angel, R.G. (ed.), *Pleistocene centennial-scale vegetational, environmental, and climatic change in the Colombian Andes: based on biotic and abiotic proxy analyses from lake Fúquene sediments*. PhD thesis, Univ. Amsterdam, pp. 105-132, ISBN: 978-90-76894-98-0, 2011b.
- Bogotá, R.G., Hooghiemstra, H., and Berrio, J.-C.: North Andean environmental and climatic change at orbital to submillennial time-scales: vegetation, water levels and sedimentary regimes from lake Fúquene from 284 to 130 ka. *Rev. Palaeobot. Palynol.*, 226, 91-107, <https://doi.org/10.1016/j.revpalbo.2015.09.007>, 2015.
- Bradbury, J.P.: The late Cenozoic diatom stratigraphy and paleolimnology of Tule Lake, Siskiyou Co, California. *J. Paleolim.*, 6, 205-255, doi:10.1007/BF00233073, 1991.
- Bradbury, J.P.: Limnologic history of Lago de Patzcuaro, Michoacan, Mexico for the past 48,000 years: impacts of climate and man. *Palaeogeogr. Palaeoclimatol. Palaeoecol.*, 163, 69–95, [https://doi.org/10.1016/S0031-0182\(00\)00146-2](https://doi.org/10.1016/S0031-0182(00)00146-2), 2000.
- Bradbury, J.P.: A diatom record of climate and hydrology for the past 200 ka from Owens Lake, California with comparison to other Breat Basin records. *Quat. Sci. Rev.*, 16, 203–219, [https://doi.org/10.1016/S0277-3791\(96\)00054-6](https://doi.org/10.1016/S0277-3791(96)00054-6), 1997.
- Bradbury, J.P., and Forester, R.M.: Environment and paleolimnology of Owens Lake, California: a record of climate and hydrology for the last 50,000 years. *Great Basin Aquatic Systems History*, p. 145–173, 2002.
- Brauer, A., Allen, J.R.M., Mingham, J., Dulski, P., Wulf, S., and Huntley, B.: Evidence of last interglacial chronology and environmental change from Southern Europe. *Proc. Nat. Acad. Sci. USA*, 104, 450-455, <https://doi.org/10.1073/pnas.0603321104>, 2007.
- Brigham-Grette, J., and Melles, M.: Complex drilling logistics for Lake El'gygytgyn, NE Russia. *Sci. Dril.*, 7, 38–39, doi: 10.2204/iodp.sd.7.05.2009, 2009.
- Brigham-Grette, J., Melles, M., Minyuk, P., and Party, S.: Overview and significance of a 250 ka paleoclimate record from El'gygytgyn Crater Lake, NE Russia. *J. Paleolim.*, 37, 1-16, doi: 10.1007/s10933-006-9017-6, 2007.
- Brigham-Grette, J., Melles, M., Minyuk, P., and Koeberl, C.: Millennial-scale Arctic climate change of the last 3.6 million years: scientific drilling at Lake El'gygytgyn, northeast Russia: *Oceanography*, 24, 80–81, doi: 10.5670/oceanog.2011.58, 2011.
- Brigham-Grette, J., Melles, M., Minyuk, P., Andreev, A., Tarasov, P., DeConto, R., Koenig, S., Nowaczyk, N., Wennrich, V., Ros en, P., Haltia, E., Cook, T., Gebhardt, C., Meyer-Jacob, C., Snyder, J., and Herzschuh, U.: Pliocene warmth, polar amplification, and stepped Pleistocene cooling recorded in NE Arctic Russia. *Science*, 340, 1421–1427, doi: 10.1126/science.1233137, 2013.

- Bright, J., Kaufman, D.S., Forester, R.M., and Dean, W.E.: A continuous 250,000 yr record of oxygen and carbon isotopes in ostracode and bulk-sediment carbonate from Bear Lake, Utah-Idaho: *Quat. Sci. Rev.*, 25, 2258–2270, doi: 10.1016/j.quascirev.2005.12.011, 2006.
- Bronk Ramsey, C., Staff, R.A., Bryant, C.L., Brock, F., Kitagawa, H., Van der Plicht, J., Scholaut, G., Marshall, M.H., Brauer, A., Lamb, H.F., Payne, R.L., Tarasov, P.E., Haraguchi, T., Gotanda, K., Yonenobu, H., Yokoyama, Y., Tada, R., and Nakagawa, T.: A complete terrestrial radiocarbon record for 11.2 to 52.8 kyr BP *Science*, 338, 370–374, <https://doi.org/10.1126/science.1226660>, 2012.
- Bronk Ramsey, C., Heaton, T.J., Scholaut, G., Staff, R.A., Bryant, C.L., Brauer, A., Lamb, H.F., Marshall, M.H., and Nakagawa, T.: Reanalysis of the atmospheric radiocarbon calibration record from Lake Suigetsu, Japan. *Radiocarbon*, 62, 989–999, doi: <https://doi.org/10.1017/RDC.2020.18>, 2020.
- Brown, E.T., Johnson, T.C., Scholz, C.A., Cohen, A.S., and King, J.W.: Abrupt change in tropical African climate linked to the bipolar seesaw over the past 55,000 years. *Geophys. Res. Lett.*, 34, L20702, doi: L20702 10.1029/2007gl031240, 2007.
- Burbridge, R.E., Mayle, F.E., and Killeen, T.J.: Fifty-thousand-year vegetation and climate history of Noel Kempff Mercado National Park, Bolivian Amazon. *Quat. Res.*, 61, 215–230, doi:10.1016/j.yqres.2003.12.004, 2004.
- Burnett, A.P., Soreghan, M.J., Scholz, C.A., and Brown, E.T.: Tropical East African climate change and its relation to global climate: a record from Lake Tanganyika, tropical East Africa, over the past 90+kyr: *Palaeogeogr. Palaeoclimatol. Palaeoecol.*, 303, 155–167, doi: 10.1016/j.palaeo.2010.02.011, 2011.
- Bush, M.B., and Colinvaux, P.A.: A pollen record of a complete glacial cycle from lowland Panama. *J. Veget. Sci.*, 1, 105–118, <https://doi.org/10.2307/3236060>, 1990.
- Bush, M.B., Silman, M.R., and Urrego, D.H.: 48,000 years of climate and forest change in a biodiversity hot spot. *Science*, 303, 827–829, doi: 10.1126/science.1090795, 2004.
- Caballero, M., Lozano, S., Ortega, B., Urrutia, J., and Macías, J.L.: Environmental characteristics of Lake Tecocomulco, northern basin of Mexico, for the last 50,000 years. *J. Paleolim.*, 22, 399–411, doi:10.1023/A:1008012813412, 1999.
- Camuera, J., Jimenez-Moreno, G., Ramos-Román, M.J., García-Alix, A., Toney, J.L., Anderson, R.S., Jiménez-Espejo, F., Bright, J., Webster, C., Yanes, Y., and Carrión, J.S.: Vegetation and climate changes during the last two glacial-interglacial cycles in the western Mediterranean: a new long pollen record from Padul (southern Iberian Peninsula). *Quat. Sci. Rev.*, 205, 86–105, <https://doi.org/10.1016/j.quascirev.2018.12.013>, 2019.
- Castro, D.: Sedimentologia, estratigrafia, palinologia, diatomáceas e geoquímica de depósitos Quaternários na Margem Leste da Ilha De Marajó, Pará, Brasil. Ph.D. dissertation, Universidade de São Paulo, São Paulo, Brasil, 214 pp, 2010.
- Castro, D., Oliveira, P.E de, Rossetti, D.F., and Ruiz-Pessenda, L.C.: Late Quaternary landscape evolution of northeastern Amazonia from pollen and diatom records. *Anais Da Academia Brasileira de Ciências*, 85, 35–55, <https://doi.org/10.1590/S0001-37652013000100004>, 2013.
- Chen, H., Bloemendal, W., Zhang, P., and Liu, G.: An 800 ky proxy record of climate from lake sediments of the Zoige Basin, eastern Tibetan Plateau. *Palaeogeogr. Palaeoclimatol. Palaeoecol.*, 151, 307–320, [http://dx.doi.org/10.1016/S0031-0182\(99\)00032-2](http://dx.doi.org/10.1016/S0031-0182(99)00032-2), 1999.
- Cheng, H., Edwards, R.L., Sinha, A., Spötl, C., Yi, L., Chen, S., Kelly, M., Kathayat, G., Wang, X., Li, X., Kong, X., Wang, Y., Ning, Y., and Zhang, H.: The Asian monsoon over the past 640,000 years and ice age terminations. *Nature*, 534, 640–646, <https://doi.org/10.1038/nature18591>, 2016.
- Chepstow-Lusty, A., Bush, M.B., Frogley, M.R., Baker, P.A., Fritz, S.C., and Aronson, J.: Vegetation and climate change on the Bolivian Altiplano between 108,000 and 18,000 yr ago. *Quat. Res.*, 63, 90–98, doi: 10.1016/j.yqres.2004.09.008, 2005.
- Chevalier, M., Chase, B.M., Quick, L.J., Dupont, L.M., and Johnson, T.C.: Temperature change in subtropical southeastern Africa during the past 790,000 yr. *Geology*, <https://doi.org/10.1130/G47841.1>, 2020.



- Cohen, A.S., 2011, Scientific drilling and biological evolution in ancient lakes: lessons learned and recommendations for the future: *Hydrobiologia*, 682, 3–25, doi: 10.1007/s10750-010-0546-7, 2011.
- Cohen, A.S., Scholz, C.A., and Johnson, T.C.: The International Decade of East African Lakes (IDEAL) drilling initiative for the African Great Lakes: *J. Paleolim.*, 24, 231–235, doi: 10.1023/A:1008158902422, 2000.
- Cohen, A., Palacios-Fest, M., Negrini, R., Wigand, P., and Erbes, D.: A paleoclimate record for the past 250,000 years from Summer Lake, Oregon, USA: II. Sedimentology, paleontology and geochemistry: *J. Paleolim.*, 24, 151–182, doi: 10.1023/a:1008165326401, 2000.
- Coletti, A.J., DeConto, R.M., Brigham-Grette, J., and Melles, M.: A GCM comparison of Pleistocene super-interglacial periods in relation to Lake El'gygytgyn, NE Arctic Russia: *Clim. Past*, 11, 979–989, doi: 10.5194/cp-11-979-2015, 2015.
- Colhoun, E.A., Pola, J.S., Barton, C.E., and Heijnis, H.: Late Pleistocene vegetation and climate history of Lake Selina, western Tasmania. *Quat. Intern.*, 57–58, 5–23, [https://doi.org/10.1016/S1040-6182\(98\)00046-9](https://doi.org/10.1016/S1040-6182(98)00046-9), 1999.
- Colinvaux, P.A., Irion, G., Rasanen, M.E., Bush, M.B., and De Mello, J.A.: A paradigm to be discarded: geological and paleoecological data falsify the Haffer & Prance refuge hypothesis of Amazonian speciation. *Amazoniana*, 16, 606–607, 2001.
- Colman, S.M.: Acoustic stratigraphy of Bear Lake, Utah, Idaho, late Quaternary sedimentation patterns in a simple half-graben: *Sedim. Geol.*, 185, 113–125, 2006, doi: 10.1016/j.sedgeo.2005.11.022.
- Colman, S.M., Hemming, S.R., Stine, S., and Zimmerman, S.R.H.: The effects of recent uplift and volcanism on deposition in Mono Lake, California, from seismic-reflection (CHIRP) profiles: *J. Geoph. Res., Solid Earth*, 119, 3955–3970, doi: 10.1002/2013JB010726, 2014.
- Colman, S. M., Jones, G. A., Rubin, M., King, J. W., Peck, J. A., and Orem, W.H.: AMS radiocarbon analyses from Lake Baikal, Siberia. Challenges of dating sediments from a large oligotrophic lake, *Quat. Sci. Rev.*, 15, 669–684, [https://doi.org/10.1016/0277-3791\(96\)00027-3](https://doi.org/10.1016/0277-3791(96)00027-3), 1996.
- Colman, S.M.M., Kaufman, D.S.S., Bright, J., Heil, C., King, J.W.W., Dean, W.E.E., Rosenbaum, J.G.G., Forester, R.M.M., Bischoff, J.L.L., Perkins, M., and McGeehin, J.P.: Age model for a continuous ca 250 ka Quaternary lacustrine record from Bear Lake, Utah-Idaho. *Quat. Sci. Rev.*, 25, 2271–2282, doi: 10.1016/j.quascirev.2005.10.015, 2006.
- Colman, S.M., Rosenbaum, J.G., Kaufman, D.S., Dean, W.E., and McGeehin, J.P., Radiocarbon ages and age models for the past 30,000 years in Bear Lake, Utah and Idaho. *Geol. Soc. Am. Sp. Pap.* 50, 133–144, doi: [https://doi.org/10.1130/2009.2450\(05\)](https://doi.org/10.1130/2009.2450(05)), 2009.
- Colman, S.M., Peck, J.A., Karabanov, E.B., Carter, S.J., Bradbury, J.P., King, J.W., and Williams, D.F.: Continental climate response to orbital forcing from biogenic silica records in Lake Baikal. *Nature*, 378, 769–771, <https://doi.org/10.1038/378769a0>, 1995.
- Correa-Metrio, A., Bush, M.B., Cabrera, K.R., Sully, S., Brenner, M., Hodell, D.A., Escobar, J., and Guilderson, T.: Rapid climate change and no-analog vegetation in lowland Central America during the last 86,000 years: *Quat. Sci. Rev.*, 38, 63–75, doi: 10.1016/j.quascirev.2012.01.025, 2012a.
- Correa-Metrio, A., Bush, M.B., Hodell, D.A., Brenner, M., Escobar, J., and Guilderson, T.: The influence of abrupt climate change on the ice-age vegetation of the Central American lowlands: *J. Biogeogr.*, 39, 497–509, doi: 10.1111/j.1365-2699.2011.02618.x, 2012b.
- Correa-Metrio, A., Lozano-García, S., Xelhuantzi-López, S., Sosa-Nájera, and Metcalfe, S.E.: Vegetation in western Central Mexico during the last 50,000 years: modern analogs and climate in the Zacapu Basin. *J. Quat. Sci.*, 27, 509–518, <https://doi.org/10.1002/jqs.2540>, 2012.
- Costa, K.M.M., Russell, J.M.M., Vogel, H., and Bijaksana, S.: Hydrological connectivity and mixing of Lake Towuti, Indonesia in response to paleoclimatic changes over the last 60,000 year. *Palaeogeogr. Palaeoclimatol. Palaeoecol.*, 17, 467–475, doi: 10.1016/j.palaeo.2014.10.009, 2015.
- Currey, D.R.: Quaternary palaeolakes in the evolution of semi-desert basins, with special emphasis on Lake Bonneville and the Great-Basin, USA. *Palaeogeogr. Palaeoclimatol. Palaeoecol.*, 76, 189–214, doi: 10.1016/0031-0182(90)90113-1, 1990.

- D'Anjou, R.M., Wei, J.H., Castañeda, I.S., Brigham-Grette, J., Petsch, S.T., and Finkelstein, D.B.: High-latitude environmental change during MIS 9 and 11: biogeochemical evidence from Lake El'gygytyn, Far East Russia. *Clim. Past*, 9, 567–581, doi: 10.5194/cp-9-567-2013, 2013.
- D'Apolito, C., Absy, M.L., and Latrubesse, E.M.: The Hill of Six Lakes revisited: new data and re-evaluation of a key Pleistocene Amazon site. *Quat. Sci. Rev.*, 76, 140–155, doi:10.1016/j.quascirev.2013.07.013, 2013.
- Davis, O.K.: Palynological evidence for vegetation cycles in a 1.5 million year pollen record from the Great Salt Lake, Utah, USA. *Palaeogeogr. Palaeoclimatol. Palaeoecol.*, 138, 175–185, doi: 10.1016/s0031-0182(97)00105-3, 1998.
- Davis, O.K., and Moutoux, T.E.: Tertiary and Quaternary vegetation history of the Great Salt Lake, Utah, USA. *J. Paleolim.*, 19, 417–427, doi: 10.1023/a:1007959203433, 1998.
- Dean, W.E.: Endogenic carbonate sedimentation in Bear Lake, Utah and Idaho, over the last two glacial-interglacial cycles, *Geol. Soc. Am. Sp. Pap.*, 450, 169–196, [https://doi.org/10.1130/2009.2450\(07\)](https://doi.org/10.1130/2009.2450(07)), 2009.
- De Beaulieu, J.L., Andrieu-Ponel, V., Reille, M., Grüger, E., Tzedakis, C., and Svitavská-Svobodová, H.: An attempt at correlation between the Velay pollen sequence and the middle Pleistocene stratigraphy from Central Europe. *Quat. Sci. Rev.*, 20, 1593–1602, [https://doi.org/10.1016/S0277-3791\(01\)00027-0](https://doi.org/10.1016/S0277-3791(01)00027-0), 2001.
- De Beaulieu, J.L., Evain, J., Mandier, P., Monjuvent, G., and Reille, N.: Les Echets: un marais capital pour l'histoire climatique du Quaternaire rhodanien. *Mém. Musée Nat. Hist. Nat., Serie B, Botanique*, 27, 123–136, <https://doi.org/10.7202/032531ar>, 1980.
- De Beaulieu, J.L., and Reille, M.: A long Upper Pleistocene pollen record from Les Echets, near Lyon, France. *Boreas*, 13, 111–132, <https://doi.org/10.1111/j.1502-3885.1984.tb00066.x>, 1984.
- De Beaulieu, J.L., and Reille, M.: The pollen sequence of les Echets (France): a new element for the chronology of the Upper Pleistocene. *Géogr. Phys. Quatern.*, 38, 3–9, doi:10.7202/032531ar, 1984.
- De Beaulieu, J.L., and Reille, M.: The transition from temperate phases to stadials in the long Upper Pleistocene sequence from Les Echets (France). *Palaeogeogr. Palaeoclimatol. Palaeoecol.*, 72, 147–159, doi: 10.1016/0031-0182(89)90139-9, 1989.
- De Beaulieu, J.L., and Reille, M.: The last climatic cycle at La Grande Pile (Voges, France); a new profile. *Quat. Sci. Rev.*, 11, 431–438, [https://doi.org/10.1016/0277-3791\(92\)90025-4](https://doi.org/10.1016/0277-3791(92)90025-4), 1992.
- De Beaulieu, J.L., Reille, M.: Long Pleistocene pollen sequences from the Velay Plateau (Massif Central, France). *Veget. Hist. Archaeobot.*, 1, 233–242, doi: 10.1007/bf00189500, 1992.
- De Beaulieu, J.L., Tzedakis, P., Ponel, P., and Frédéric, G.: Pollen records, late Pleistocene, Southern Europe. In: Elias, S.A. (ed.), *Encyclopedia of Quaternary Science*, Vol. 4, pp. 2660–2668. Elsevier, Amsterdam, 2007.
- De Busk, Jr., G.H.: A 37,500 year pollen record from Lake Malawi and implications for the biogeography of Afrotropical forests. *J. Biogeogr.*, 25, 479–500, <https://doi.org/10.1046/j.1365-2699.1998.2530479.x>, 1998.
- De Deckker, P., Van der Kaars, S., Haberle, S., Hua, Q., and Stuut, J.-B.: The pollen record from marine core MD03-2607 from offshore Kangaroo Island spanning the last 125 ka; implications for vegetation changes across the Murray-Darling Basin. *Austr. J. Earth Sci.*, <https://doi.org/10.1080/08120099.2021.1896578>, 2021.
- De Oliveira, P.E.: A palynological record of late Quaternary vegetation and climatic change in Southeastern Brazil. Ph.D. dissertation. The Ohio State University, Columbus, Ohio, USA, 1992.
- Demske, D., Heumann, G., Granoszewski, W., Nita, M., Mamakowa, K., Tarasov, P. E., and Oberhänsli, H.: Late glacial and Holocene vegetation and regional climate variability evidenced in high-resolution pollen records from Lake Baikal, *Glob. Planet. Change*, 46, 255–279, <https://doi.org/10.1016/j.gloplacha.2004.09.020>, 2005.
- Demske, D., Tarasov, P. E., Wünnemann, B., and Riedel, F.: Late glacial and Holocene vegetation, Indian monsoon and westerly circulation in the Trans-Himalaya recorded in the lacustrine pollen sequence from Tso Kar, Ladakh, NW India. *Palaeogeogr. Palaeoclimatol. Palaeoecol.*, 279, 172–185, doi: [10.1016/j.palaeo.2009.05.008](https://doi.org/10.1016/j.palaeo.2009.05.008), 2009.
- Demske, D., Tarasov, P.E., Nakagawa, T., and Suigetsu 2006 Project Members: Atlas of pollen, spores and further non-pollen palynomorphs recorded in the glacial-interglacial late Quaternary

- sediments of Lake Suigetsu, central Japan. *Quat. Intern.*, 290-291, 164-238, <https://doi.org/10.1016/j.quaint.2012.02.002>, 2013.
- Develle, A.L., Gasse, F., Vidal, L., Williamson, D., Demory, F., Van Campo, E., Ghaleb, B., and Thouveny, N.: A 250 ka sedimentary record from a small karstic lake in the Northern Levant (Yammoûneh, Lebanon): paleoclimatic implications. *Palaeogeogr. Palaeoclimatol. Palaeoecol.*, 305, 10-27, <https://doi.org/10.1016/j.palaeo.2011.02.008>, 2011.
- De Wet, G.A., Castañeda, I.S., DeConto, R.M., and Brigham-Grette, J.: A high-resolution mid-Pleistocene temperature record from Arctic Lake El'gygytgyn: a 50 kyr super interglacial from MIS 33 to MIS 31? *Earth Planet. Sci. Lett.*, 436, doi: 10.1016/j.epsl.2015.12.021, 2016.
- Ding, Z.L., Derbyshire, E., Yang, S.L., Yu, Z.W., Xiong, S.F., and Liu, T.S.: Stacked 2.6-Ma grain size record from the Chinese loess based on five sections and correlation with the deep-sea  $\delta^{18}\text{O}$  record. *Paleoceanogr.*, 17, 1-21, <https://doi.org/10.1029/2001PA000725>, 2002.
- Doner, L.A.: A 19,000-year vegetation and climate record for Bear Lake, Utah and Idaho. *Geol. Soc. Am. Sp. Pap.*, 450, 217-227, doi: 10.1130/2009.2450(09), 2009.
- Dueñas-J, H.: Estudio palinológico de los 35 mts superiores der la seccion Tarragona, Sabana de Bogotá. *Caldasia*, 12, 539-571, doi: [10.15446/caldasia](https://doi.org/10.15446/caldasia), 1979.
- Durand, A.: Oscillations of Lake Chad over the past 50,000 years: new data and new hypothesis. *Palaeogeogr. Palaeoclimatol. Palaeoecol.*, 39, 37-53, [https://doi.org/10.1016/0031-0182\(82\)90071-2](https://doi.org/10.1016/0031-0182(82)90071-2), 1982.
- Eardley, A.J., and Gvodetsky, V.: Analysis of Pleistocene core from Great Salt Lake, Utah. *Geol. Soc. Am. Bull.*, 71, 1323-1344, [https://doi.org/10.1130/0016-7606\(1960\)71\[1323:AOPCFG\]2.0.CO;2](https://doi.org/10.1130/0016-7606(1960)71[1323:AOPCFG]2.0.CO;2), 1960.
- Elenga, H., Maley, J., Vincens, A., and Farrera, I.: Palaeoenvironments, palaeoclimates and landscape development in Atlantic Equatorial Africa: a review of key sites covering the last 25 kyrs. In: Battarbee, R.W., Gasse, F., and Stickley C. (eds.), *Past variability through Europe and Africa*, Springer, Dordrecht, Netherlands, pp. 181-198, 2004.
- Elliot, M., Neall, V., and Wallace, C.: A late Quaternary pollen record from Lake Tangonge, far northern New Zealand. *Rev. Palaeobot. Palynol.*, 136, 143-158, <https://doi.org/10.1016/j.revpalbo.2005.05.003>, 2005.
- Escobar, J., Hodell, D.A., Brenner, M., Curtis, J.H., Gilli, A., Mueller, A.D., Anselmetti, F.S., Ariztegui, D., Grzesik, D.A., Pérez, L., Schwalb, A., and Guilderson, T.P.: A ~43-ka record of paleoenvironmental change in the Central American lowlands inferred from stable isotopes of lacustrine ostracods: *Quat. Sci. Rev.*, 37, 92-104, doi: 10.1016/j.quascirev.2012.01.020, 2012.
- Fernandes, R.S., Garcia, M.J., De Oliveira, P.E., and De Melo, M.S.: Catálogo palinológico do Quaternário tardio da região de Ponta Grossa Paraná, Brasil. *Geociencias* 3, 44-63, 2003.
- Flantua, S.G.A., O'Dea, A., Onstein, R., Giraldo, C., and Hooghiemstra, H.: The flickering connectivity system of the north Andean páramos. *J. Biogeogr.*, 46, 1808-1825, doi: 10.1111/jbi.13607, 2019.
- Flenley, J.R., and King, S.M.: Late Quaternary pollen records from Easter Island. *Nature*, 307, 47-50, doi: [10.1038/307047a0](https://doi.org/10.1038/307047a0), 1984.
- Flenley, J.R., King, S.M., Jackson, J., Chew, C., Teller, J.T., and Prentice, M.E.: The late Quaternary vegetation and climatic history of Easter Island. *J. Quat. Sci.*, 6, 85-115, <https://doi.org/10.1002/jqs.3390060202>, 1991.
- Fletcher, W. J., Müller, U. C., Koutsodendris, A., Christanis, K., and Pross, J.: A centennial-scale record of vegetation and climate variability from 312 to 240 ka (Marine Isotope Stages 9c-a, 8 and 7e) from Tenaghi Philippon, NE Greece. *Quat. Sci. Rev.*, 78, 108-125, <https://doi.org/10.1016/j.quascirev.2013.08.005>, 2013.
- Fletcher, W.J., Sánchez Goñi, M.F., Allen, J.R.M., Cheddadi, R., Combourieu- Nebout, N., Huntley, B., Lawson, I., Londeix, L., Magri, D., Margari, V., Müller, U.C., Naughton, F., Novenko, E., Roucoux, K., and Tzedakis, P.C.: Millennial-scale variability during the last glacial in vegetation records from Europe. *Quat. Sci. Rev.*, 29, 2839-2864, <https://doi.org/10.1016/j.quascirev.2009.11.015>, 2010.
- Florschütz, F., Menéndez Amor, J., and Wijmstra, T. A.: Palynology of a thick Quaternary succession in southern Spain. *Palaeogeogr. Palaeoclimatol. Palaeoecol.*, 10, 233-264, [https://doi.org/10.1016/0031-0182\(71\)90049-6](https://doi.org/10.1016/0031-0182(71)90049-6), 1971.

- Follieri, M., Magri, D., and Sadori, L.: A 250,000 year pollen record from Valle di Castiglione (Roma). *Pollen et Spores*, 30, 329–356 1988.
- Follieri, M., Magri, M., and Sadori, L.: Pollen stratigraphical synthesis from Valle di Castiglione (Roma). *Quat. Intern.*, 3-4, 81-84, doi:10.1016/1040-6182(89)90076-1, 1989.
- Follieri, M., Giardini, M., Madri, D., and Sadori, L.: Palynostratigraphy of the last glacial period in the volcanic region of Central Italy. *Quat. Intern.*, 47-48, 3-20, [https://doi.org/10.1016/S1040-6182\(97\)00065-7](https://doi.org/10.1016/S1040-6182(97)00065-7), 1988.
- Franke, A., Wennrich, V., Sauerbrey, M., Juschus, O., Melles, M., and Brigham-Grette, J.: Multivariate statistic and time series analyses of grain-size data in Quaternary sediments of Lake El'gygytyn, NE Russia: *Clim. Past*, 9, 2459–2470, doi: 10.5194/cp-9-2459-2013, 2013.
- Fritz, S.C., Baker, P.A., Lowenstein, T.K., Seltzer, G.O., Rigsby, C.A., Dwyer, G.S., Tapia, P.M., Arnold, K.K., Ku, T.-L., and Luo, S.: Hydrologic variation during the last 170,000 years in the southern hemisphere tropics of South America. *Quat. Res.*, 61, 95–104, doi:10.1016/j.yqres.2003.08.007, 2004.
- Fritz, S.C.C., Baker, P.A.A., Tapia, P., Spanbauer, T., and Westover, K.: Evolution of the Lake Titicaca basin and its diatom flora over the last ~370,000 years. *Palaeogeogr. Palaeoclimatol. Palaeoecol.*, 317–318, 93–103, doi: 10.1016/j.palaeo.2011.12.013, 2012.
- Fritz, S.C., Baker, P.A., Ekdahl, E., Seltzer, G.O., and Stevens, L.R.: Millennial-scale climate variability during the Last Glacial period in the tropical Andes. *Quat. Sci. Rev.*, 29, 1017–1024, doi: 10.1016/j.quascirev.2010.01.001, 2010.
- Fritz, S.C., Baker, P.A., Lowenstein, T.K., Seltzer, G.O., Rigsby, C.A., Dwyer, G.S., Tapia, P.M., Arnold, K.K., Ku, T.-L., and Luo, S.: Hydrologic variation during the last 170,000 years in the southern hemisphere tropics of South America. *Quat. Res.*, 61, 95–104, doi: 10.1016/j.yqres.2003.08.007, 2004.
- Fritz, S.C., Baker, P.A., Seltzer, G.O., Ballantyne, A., Tapia, P., Cheng, H., and Edwards, R.L.: Quaternary glaciation and hydrologic variation in the South American tropics as reconstructed from the Lake Titicaca drilling project. *Quat. Res.*, 68, 410–420, doi: 10.1016/j.yqres.2007.07.008, 2007.
- Fuji, N.: Change of climate during the Wisconsin stage based on palynological study of 200 meters core samples of Lake Biwa in Japan. *Proc. Jap. Acad.* 49, 737-741, 1973.
- Fuji, N.: Palynological investigation on a 200-meter core sample from Lake Biwa in Central Japan. *Paleolimnology Lake Biwa and the Japanese Pleistocene* 4, 357-421, <https://doi.org/10.2183/pjab1945.53.139>, 1976.
- Fuji, N.: Comparison of palaeovegetation and palaeoclimate in the Lake Biwa area of Japan and northwestern Europe during the Weichselian stage. *Paleolimnology Lake Biwa and the Japanese Pleistocene* 9, 125-150, 1981.
- Fuji, N.: Palynological study of 200-meter core samples from Lake Biwa, Central Japan. I. The palaeovegetational and palaeoclimatic changes during the last 600,000 years. *Trans. Proc. Palaeontol. Soc. Japan, N.S.*, 132, 230-252, 1983.
- Fuji, N.: Palynological study of 200-meter core samples from Lake Biwa, Central Japan. II. The palaeovegetational and palaeoclimatic changes during the ca. 250,000-100,000 years BP. *Trans. Proc. Palaeontol. Soc. Japan, N.S.*, 144, 490-515, 1986a.
- Fuji, N.: Global correlation on the palaeoclimatic change between Lake Biwa sedimentary evidence and other marine and terrestrial records. *Proc. Japan Acad., Series B*, 62, 1-4, 1986b.
- Fuji, N.: Palaeovegetation and palaeoclimate changes around Lake Biwa, Japan during the last ca. 3 million years. *Quat. Sci. Rev.*, 7, 21-28, <https://doi.org/10.1080/03680770.1987.11899730>, 1988.
- Fuji, N.: Climatic changes based on palynological evidences from Lake Biwa, Central Japan, since the middle Pleistocene. *Department of Earth Sciences, Kanazawa University, New Series* 134, 17-30, 1989.
- Fuji, N., and Horowitz, A.: Brunhes epoch paleoclimates of Japan and Israel. *Palaeogeogr. Palaeoclimatol. Palaeoecol.*, 72, 79-88, [https://doi.org/10.1016/0031-0182\(89\)90133-8](https://doi.org/10.1016/0031-0182(89)90133-8), 1989.
- Gasse, F., and Van Campo, E.: A 40,000-yr pollen and diatom record from Lake Tritrivakely, Madagascar, in the southern tropics. *Quat. Res.*, 49, 299-311, <https://doi.org/10.1006/qres.1998.1967>, 1998.



- Gasse, F., Van Campo, E., Benedetti, F., Demory, F., Develle, A.L., Kaniewski, D., Tachikawa, K., Thouveny, N., and Vidal, L.: Late Quaternary palaeoenvironments in northern Levant (Lebanon and Syria). In: Enzel, Y., Bar-Yosef, O. (eds.), *Quaternary of the Levant: environments, climate change, and humans*. Cambridge Univ. Press, Cambridge, UK, pp. 173-178, 2017.
- Gasse, F., Vidal, L., Van Campo, E., Demory, F., Develle, A.-L., Tachikawa, K., Elias, A., Bard, E., Garcia, M.N., Sonzogni, C., and Thouveny, N.: Hydroclimatic changes in northern Levant over the past 400,000 years. *Quat. Sci. Rev.*, 111, 1-8, <https://doi.org/10.1016/j.quascirev.2014.12.019>, 2015.
- Giardini, M.: Late Quaternary vegetation history at Stracciaccappa (Rome, central Italy). *Veget. Hist. Archaeobot.*, 16, 301-316, doi:10.1007/s00334-006-0037-y, 2007.
- González, A., Dupont, L.M., Behling, H., and Wefer, G.: Neotropical response to rapid climate changes during the last glacial: palynological evidence from the Cariaco Basin. *Quat. Res.*, doi 10.1016/j.yqres.2007.12.001, 2008.
- González, C., Dupont, L.M., K., M., and Wefer, G.: Reconstructing marine productivity of the Cariaco Basin during marine isotope stages 3 and 4 using organic-walled dinoflagellate cysts. *Paleoceanography*, 23, 3215-3231, doi: 10.1029/2008PA001602, 2008.
- González, C., and Dupont, L.M.: Tropical salt marsh succession as sea-level indicator during Heinrich events. *Quat. Sci. Rev.*, 28, 939-946, doi:10.1016/j.quascirev.2008.12.023, 2009.
- Gosling, W.D., Bush, M.B., Hanselman, J.A., and Chepstow-Lusty, A.: Glacial-interglacial changes in moisture balance and the impact on vegetation in the southern hemisphere tropical Andes (Bolivia/Peru). *Palaeogeogr. Palaeoclimatol. Palaeoecol.*, 259, 35-50, doi: 10.1016/j.palaeo.2007.02.050, 2008.
- Graf, K.: Palynological investigations of two post-glacial peat bogs near the boundary of Bolivia and Peru. *J. Biogeogr.*, 8, 353-368, doi:10.2307/2844756, 1981.
- Graf, K.: Pollen diagramme aus den Anden, eine Synthese zur Klimageschichte und Vegetationsentwicklung seit der letzten Eiszeit. *Physische Geographie*, 34, University of Zürich, Switzerland, 1-138, 1992.
- Granoszewski, W.: Late Pleistocene vegetation history and climatic changes at Horoszk Duze, Eastern Poland: a palaeobotanical study. *Acta Palaeobotanica*, 4, 3-95, 2003.
- Granoszewski, W., Demske, D., Nita, M., and Heumann, G.: Vegetation and climate variability during the Last Interglacial evidenced in the pollen record from Lake Baikal. *Glob. Planet. Change*, 46, 187-198, <https://doi.org/10.1016/j.gloplacha.2004.09.017>, 2005.
- Grimm, E.C., Jacobson Jr., G.L., Watts, W.A., Hansen, B.S.C., and Maasch, K.A.: A 50,000-year record of climate oscillations from Florida and its temporal correlation with the Heinrich Events. *Science*, 261, 198-200, doi: 10.1126/science.261.5118.198, 1993.
- Grimm, E.C., Watts, W.A., Jacobson Jr., G.L., Hansen, B.C.S., Almquist, H.R., and Dieffenbacher-Krall, A.C.: Evidence for warm wet Heinrich events in Florida. *Quat. Sci. Rev.*, 25, 2197-2211, doi: 10.1016/j.quascirev.2006.04.008, 2006.
- Groot, M.H.M., Bogotá, R.G. Lourens, L.J., Hooghiemstra, H., Vriend, M., Berrio, J.C., Tuenter, E., Van der Plicht, J.H., Van Geel, B., Ziegler, M., Weber, S.L., and 14 Fúquene Project Members: Ultra-high resolution pollen record from the northern Andes reveals rapid shifts in montane climates within the last two glacial cycles. *Clim. Past*, 7, 299-316, <https://doi.org/10.5194/cp-7-299-2011>, 2011.
- Groot, M.H.M., Hooghiemstra, H., Berrio, J.-C., and Giraldo, C.: North Andean environmental and climatic change at orbital to submillennial time-scales: vegetation, water-levels, and sedimentary regimes from Lake Fúquene during 130-27 ka. *Rev. Palaeobot. Palynol.*, 197, 186-204, <https://doi.org/10.1016/j.revpalbo.2013.04.005>, 2013.
- Groot, M.H.M., Van der Plicht, J., Hooghiemstra, H., Lourens, L.J., and Rowe, H.D.: Age modelling for Pleistocene lake sediments: a comparison of methods from the Andean Fúquene Basin (Colombia) case study. *Quat. Geochronol.*, 22, 144-154, doi:10.1016/j.quageo.2014.01.002, 2014.
- Grüger, E.: Spätriss, Riss/Würm und Frühwürm am Samerberg in Oberbayern; ein vegetationsgeschichtlicher Beitrag zur Gliederung des Jungpleistozäns [Late Riss, Riss/Würm and Early Würm at Samerberg/Upper Bavaria; a pollen analytical contribution to the division of the Upper Pleistocene]. *Geologica Bavarica*, 80, 5-64, 1979a.

- Grüger, E.: Die Seeablagerungen von Samerberg/Oberbayern und ihre Stellung im Jungpleistozän. *Eiszeitalter Gegenwart*, 29, 23-34, doi: [10.3285/eg.29.1.03](https://doi.org/10.3285/eg.29.1.03), 1979b.
- Grüger, E.: Late Quaternary biostratigraphy in northern Germany 150,000-15,000 years BP. *Striae*, 34, 7-14, 1991.
- Guo, Z.T., Biscaye, P., Wei, L.Y., Chen, X.H., Peng, S.Z., and Liu, T.S.: Summer monsoon variations over the last 1.2 Ma from the weathering of loess-soil sequences in China. *Geoph. Res. Lett.*, 27, 1751–1754, <https://doi.org/10.1029/1999GL008419>, 2000.
- Guo, Z.T., Ruddiman, W.F., Hao, Q.Z., Wu, H.B., Qiao, Y.S., Zhu, R.X., Peng, S.Z., Wei, J. J., Yuan, B.Y., and Liu, T.S.: Onset of Asian desertification by 22 Myr ago inferred from loess deposits in China. *Nature*, 416, 159–163, <https://doi.org/10.1038/416159a>, 2002.
- Hanselman, J.A., Bush, M.B., Gosling, W.D., and Collins, A.F.: A 370,000-year record of vegetation and fire history around Lake Titicaca (Bolivia/Peru). *Palaeogeogr. Palaeoclimatol. Palaeoecol.*, 305, 201-214, doi: [10.1016/j.palaeo.2011.03.002](https://doi.org/10.1016/j.palaeo.2011.03.002), 2011.
- Hanselman, J.A., Gosling, W.D., Paduano, G.M., Bush, M.B.: Contrasting pollen histories of MIS 5e and the Holocene from Lake Titicaca (Bolivia/Peru). *J. Quat. Sci.*, 20, 663–670, doi: [10.1002/jqs.979](https://doi.org/10.1002/jqs.979), 2005.
- Hansen, B.C., Seltzer, G.O., and Wright Jr., H.E.: Late Quaternary vegetational change in the central Peruvian Andes. *Palaeogeogr. Palaeoclimatol. Palaeoecol.*, 109, 263–285, [https://doi.org/10.1016/0031-0182\(94\)90179-1](https://doi.org/10.1016/0031-0182(94)90179-1), 1994.
- Harle, K.J., Heijnis, H., Chisari, R., Kershaw, A.P., Zoppi, U.M., and Jacobsen, G.: A chronology of the long pollen record from Lake Wangoom, western Victoria, as derived from uranium-thorium disequilibrium dating. *J. Quat. Sci.*, 17, 707-720, <https://doi.org/10.1002/jqs.684>, 2002.
- Heil, C.W., King, J.W., Rosenbaum, J.G., Reynolds, R.L., and Colman, S.M.: Paleomagnetism and environmental magnetism of GLAD800 sediment cores from Bear Lake, Utah and Idaho. *Geol. Soc. Am. Sp. Pap.*, 450, 291–310, [https://doi.org/10.1130/2009.2450\(13\)](https://doi.org/10.1130/2009.2450(13)), 2009.
- Heim, C., Nowaczyk, N.R., Negendank, J.F.W., Leroy, S.A.G., and Ben-Avraham, Z.: Near East desertification: evidence from the Dead Sea. *Naturwissenschaften*, 84, 398-401, 1997.
- Heine, K.: Late Quaternary glacial chronology of the Mexican volcanoes. *Die Geowissenschaften*, 7, 197-226, 1988.
- Helmens, K.F.: The last interglacial-glacial cycle (MIS 5-2) re-examined based on long proxy records from central and northern Europe. *Quat. Sci. Rev.*, 86, 115-143, <https://doi.org/10.1016/j.quascirev.2013.12.012>, 2014.
- Helmens, K.F., and Kuhry, P.: Middle and late Quaternary vegetational and climatic history of the páramo de Agua Blanca (Eastern Cordillera, Colombia). *Palaeogeogr. Palaeoclimatol. Palaeoecol.*, 56, 291–335, doi: [10.1016/0031-0182\(86\)90100-8](https://doi.org/10.1016/0031-0182(86)90100-8), 1986.
- Henriksen, M., Mangerud, J., Matiouchkov, A., Murray, A.S., Paus, A., and Svendsen, J.I.: Intriguing climatic shifts in a 90 kyr old lake record from northern Russia. *Boreas*, 37, 20-37, <https://doi.org/10.1111/j.1502-3885.2007.00007.x>, 2008.
- Heusser, C.J.: Palynology of the last interglacial-glacial cycle in midlatitudes of southern Chile. *Quat. Res.*, 16, 293–321, [https://doi.org/10.1016/0033-5894\(81\)90014-4](https://doi.org/10.1016/0033-5894(81)90014-4), 1981.
- Heusser, C.J.: Quaternary pollen record from Laguna Tagua Tagua, Chile. *Science*, 220, 1429-1432, doi: [10.1126/science.219.4591.1429](https://doi.org/10.1126/science.219.4591.1429), 1983.
- Heusser, C.J.: Ice age vegetation and climate of subtropical Chile. *Palaeogeogr. Palaeoclimatol. Palaeoecol.*, 80, 107–127, [https://doi.org/10.1016/0031-0182\(90\)90124-P](https://doi.org/10.1016/0031-0182(90)90124-P), 1990.
- Heusser, C.J.: Chilotan piedmont glacier in the southern Andes during the Last Glacial Maximum. *Rev. Geol. Chile* 17., 3-18, 1990.
- Heusser, C.J., and Flint, R.F.: Quaternary glaciations and environment of northern Isla Chime, Chile. *Geology*, 5, 305-308, doi: [10.1130/0091-7613\(1977\)5<305:QGAEON>2.0.CO;2](https://doi.org/10.1130/0091-7613(1977)5<305:QGAEON>2.0.CO;2), 1977.
- Heusser, L.E., Heusser, C., Kleczkowski, A., and Crowhurst, S.: A 50,000-yr pollen record from Chile of South American millennial-scale climate instability during the last glaciation. *Quat. Res.*, 52, 154–158, <https://doi.org/10.1006/qres.1999.2069>, 1999.
- Heusser, C.J., and Heusser, L.E.: Submillennial palynology and palaeoecology of the last glaciation at Taquemó (~50,000 cal yr, MIS 2–4) in southern Chile. *Quat. Sci. Rev.*, 25, 446–454, doi: [10.1016/j.quascirev.2005.04.008](https://doi.org/10.1016/j.quascirev.2005.04.008), 2006.

- Heusser, C.J., Heusser, L.E., and Peteet, D.M.: Humptulips revisited: a revised interpretation of Quaternary vegetation and climate of western Washington, USA. *Palaeogeogr. Palaeoclimatol. Palaeoecol.*, 150, 191-221, [https://doi.org/10.1016/S0031-0182\(98\)00225-9](https://doi.org/10.1016/S0031-0182(98)00225-9), 1999.
- Heusser, L., and Oppo, D.: Millennial- and orbital-scale climate variability in southeastern United States and in the subtropical Atlantic during marine isotope stage 5: evidence from pollen and isotopes in ODP Site 1059. *Earth Planet. Sci. Lett.*, 214, 483-490, [https://doi.org/10.1016/S0012-821X\(03\)00389-3](https://doi.org/10.1016/S0012-821X(03)00389-3), 2003.
- Höbiger, N., Weber, M.E., Kehl, M., Weniger, G.-C., Julià, R., Melles, M., Fülöp, R.-H., Vogel, H., and Reicherter, K.: Lake Banyoles (northeastern Spain): a Last Glacial to Holocene multiproxy study with regard to environmental variability and human occupation. *Quat. Intern.*, 274, 205-218, <https://doi.org/10.1016/j.quaint.2012.05.036>, 2012.
- Hodell, D., Anselmetti, F., Brenner, M., and Ariztegui, D.: The Lake Petén Itzá Scientific Drilling Project. *Sci. Drill.*, 1, 25-29, doi: 10.2204/iodp.sd.3.02.2006, 2006.
- Hodell, D.A., Anselmetti, F.S., Ariztegui, D., Brenner, M., Curtis, J.H., Gilli, A., Grzesik, D.A., Guilderson, T.J., Müller, A.D., Bush, M.B., Correa-Metrio, A., Escobar, J., and Kutterolf, S.: An 85-ka record of climate change in lowland Central America. *Quat. Sci. Rev.*, 27, 1152-1165, doi: 10.1016/j.quascirev.2008.02.008, 2008.
- Hodell, D.A., Turchyn, A. V., Wiseman, C.J., Escobar, J., Curtis, J.H., Brenner, M., Gilli, A., Müller, A.D., Anselmetti, F., Ariztegui, D., and Brown, E.T.: Late Glacial temperature and precipitation changes in the lowland Neotropics by tandem measurement of  $\delta^{18}\text{O}$  in biogenic carbonate and gypsum hydration water. *Geochim. Cosmoch. Acta*, 77, 352-368, doi: 10.1016/j.gca.2011.11.026, 2012.
- Hooghiemstra, H.: Vegetational and climatic history of the high plain of Bogotá, Colombia: a continuous record of the last 3.5 million years. *Dissertationes Botanicae* 79, 1-368, 1984.
- Hooghiemstra, H.: Quaternary and Upper Pliocene glaciations and forest development in the tropical Andes: evidence from a long high-resolution pollen record from the sedimentary basin of Bogotá, Colombia. *Palaeogeogr. Palaeoclimatol. Palaeoecol.*, 72, 11-26, [https://doi.org/10.1016/0031-0182\(89\)90129-6](https://doi.org/10.1016/0031-0182(89)90129-6), 1989.
- Hooghiemstra, H., and Berrio, J.C.: Pollen records, late Pleistocene, South America. In: Elias, S. A. (ed.), *Encyclopedia of Quaternary Science*, Vol. 4, pp. 2648-2660. Elsevier, Amsterdam, 2007.
- Hooghiemstra, H., and Flantua, S.G.A.: Colombia in the Quaternary: an overview of environmental and climatic change. In: Gómez-Tapias, J. (ed.), *The Geology of Colombia Book*, Vol. 4 Quaternary, pp. 33-84. Servicio Geológico Colombiano, Bogotá, <https://doi.org/10.2345/tgocb.35.4.2>, 2019.
- Hooghiemstra, H., and Mélice, J.L.: Pleistocene evolution of orbital periodicities in the high-resolution pollen record Funza I, Eastern Cordillera, Colombia. In: De Boer, P. & Smith, D.G. (eds.), *Orbital forcing and cyclic sequences*. Sp. Publ. Intern. Assoc. Sedimentol., 19, 117-126, 1993.
- Hooghiemstra, H., Mélice, J.L., Berger, A., and Shackleton, N.J.: Frequency spectra and paleoclimatic variability of the high-resolution 30-1450 kyr Funza I pollen record (Eastern Cordillera, Colombia). *Quat. Sci. Rev.*, 12, 141-156, doi:10.1016/0277-3791(93)90013-C, 1993.
- Horiuchi, K., Minoura, K., Hoshino, K., Oda, T., Nakamura, T., and Kawai, T.: Palaeoenvironmental history of Lake Baikal during the last 23,000 years. *Palaeogeogr. Palaeoclimatol. Palaeoecol.*, 157, 95-108, [https://doi.org/10.1016/S0031-0182\(99\)00156-X](https://doi.org/10.1016/S0031-0182(99)00156-X), 2000.
- Horie, S. (ed.): *Lake Biwa. Monographiae Biologicae* 54, Junk, Dordrecht, Netherlands, 654 pp, 1984a.
- Horie, S.: Brief summary on 200 meters coring and analytical study of that core obtained in the center of Lake Biwa. *Proc. Japan Acad.* 60 B, 114-117, 1984b.
- Horie, S.: Absolute age determination on Lake Biwa core. In: Horie, S. (ed.), *History of Lake Biwa; its transition as discovered in an extremely long core of 1400-meter obtained in Lake Biwa*. Institute Paleolimnology Paleoenvironments, Lake Biwa, Kyoto University, 77-79, 1987.

- Horie, S.: Die Geschichte des Biwa-Sees in Japan. Wagner, Innsbruck, 346 pp, 1991.
- Horowitz, A.: The Quaternary of Israel. Academic Press, New York, 394 pp., 1979.
- Horowitz, A.: Subsurface palynostratigraphy and paleoclimates of the Quaternary Jordan Rift Valley fill, Israel. *J. Earth Sci.*, 36, 31–44, 1987.
- Horowitz, A.: Continuous pollen diagrams for the last 3.5 m.y. from Israel: vegetation, climate and correlation with the oxygen isotope record. *Palaeogeogr. Palaeoclimatol. Palaeoecol.*, 72, 63–78, [https://doi.org/10.1016/0031-0182\(89\)90132-6](https://doi.org/10.1016/0031-0182(89)90132-6), 1989.
- Huang, Y., Street-Perrott, F.A., Metcalfe, S.E., Brenner, M., Moreland, M., and Freeman, K.H.: Climate change as the dominant control on glacial-interglacial variations in C3 and C4 plant abundance. *Science*, 293, 1647–1651, doi: [10.1126/science.1060143](https://doi.org/10.1126/science.1060143), 2001.
- Hughen, K.A., and Heaton, T.J.: Updated Cariaco Basin 14C calibration dataset from 0–60 cal kyr BP. *Radiocarbon*, 62, 1001–1043, <https://doi.org/10.1017/RDC.2020.53>, 2020.
- Hughen, K.A., Overpeck, J.T., Peterson, L.C., and Trumbore, S.: Rapid climate changes in the tropical Atlantic region during the last deglaciation. *Nature*, 380, 51–54, <https://doi.org/10.1038/380051a0>, 1996.
- Hughen, K.A., Overpeck, J.T., Lehman, S.J., Kashgarian, M., Southon, J., Peterson, L.C., Alley, R., and Sigman, D.M.: Deglacial changes in ocean circulation from an extended radiocarbon calibration. *Nature*, 391, 65–68, <https://doi.org/10.1038/34150>, 1998.
- Hughen, K.A., Southon, J.R., Lehman, S.J., and Overpeck, J.T.: Synchronous radiocarbon and climate shifts during the last deglaciation. *Science*, 290, 1951–1954, <https://doi.org/10.1126/science.290.5498.1951>, 2000.
- Hughen, K., Lehman, S., Southon, J., Overpeck, J., Marchal, O., Herring, C., and Turnbull, J.: <sup>14</sup>C activity and global carbon cycle changes over the past 50,000 years. *Science*, 303, 202–207, <https://doi.org/10.1126/science.1090300>, 2004.
- Hughen, K., Southon, J., Lehman, S., Bertrand, C., and Turnbull, J.: Marine-derived 14C calibration and activity record for the past 50,000 years updated from the Cariaco Basin. *Quat. Sci. Rev.*, 25, 3216–3227, <https://doi.org/10.1016/j.quascirev.2006.03.014>, 2006.
- Huntley, B., Watts, W.A., Allen, J.R.M., and Zolitschka, B.: Palaeoclimate, chronology and vegetation history of the Weichselian Lateglacial: comparative analysis of data from three cores at Lago Grande di Monticchio, southern Italy. *Quat. Sci. Rev.*, 18, 945–960, 1999.
- Ivory, S.J., Lézine, A.M., Vincens, A., and Cohen, A.S.: Waxing and waning of forests: late Quaternary biogeography of southeast Africa. *Glob. Ch. Biol.*, 24, 2939–2951, <https://doi.org/10.1111/gcb.14150>, 2018.
- Jeske-Pieruschka, V., Pillar, V.D., de Oliveira, M.A.T., and Behling, H.: New insights into vegetation, climate and fire history of southern Brazil revealed by a 40,000 year environmental record from the State Park Serra do Tabuleiro. *Veg. Hist. Archaeobot.*, 22, 299–314, doi:10.1007/s00334-012-0382-y, 2013.
- Jiménez-Moreno, G., Scott Anderson, R., and Fawcett, P.J.: Orbital- and millennial-scale vegetation and climate changes of the past 225 ka from Bear Lake, Utah-Idaho (USA). *Quat. Sci. Rev.*, 26, 1713–1724, doi: 10.1016/j.quascirev.2007.05.001, 2007.
- Johnson, T.C., Brown, E.T., and Shi, J.: Biogenic silica deposition in Lake Malawi, East Africa over the past 150,000 years. *Palaeogeogr. Palaeoclimatol. Palaeoecol.*, 303, 103–109, doi: 10.1016/j.palaeo.2010.01.024, 2011.
- Johnson, T.C., Werne, J.P., Brown, E.T., Abbott, A., Berke, M., Steinman, B.A., Halbur, J., Contreras, S., Grosshuesch, S., Deino, A., Scholz, C.A., Lyons, R.P., Schouten, S., and Sinninghe Damsté, J.S.: A progressively wetter climate in southern East Africa over the past 1.3 million years. *Nature*, 537, 220–224, <https://doi.org/10.1038/nature19065>, 2016.
- Kafri U, and Horowitz, A.: Possible northward drainage of the Pliocene Hula Valley. *Israel. J. Earth Sci.*, 52, 185–190, doi:10.1560/WNM8-2LFA-MHEP-YXEK, 2003.
- Kashiwaya, K. (ed.): Long continental records from Lake Baikal. Springer Verlag Tokyo, 2003.
- Katsuta, M., Kawakami, S., Togami, S., Fukusawa, H., Kumazawa, M., and Yasuda, Y.: Advanced micro-XRF method to separate sedimentary rhythms and event layers in sediments: its application to lacustrine sediment from Lake Suigetsu, Japan. *J. Paleolim.*, 37, 259–271, <https://doi.org/10.1007/s10933-006-9028-3>, 2007.
- Kaufman, D.S., Bright, J., Dean, W.E., Rosenbaum, J.G., Moser, K., Anderson, R.S., Colman, S.M., Heil, C.W., Jiménez-Moreno, G., Reheis, M.C., and Simmons, K.R.: A quarter-million



- years of paleoenvironmental change at Bear Lake, Utah and Idaho. *Geol. Soc. Am. Sp. Pap.*, 450, 311–351, doi:[10.1130/2009.2450\(14\)](https://doi.org/10.1130/2009.2450(14)), 2009.
- Kershaw, A.P.: A long continuous pollen sequence from northeastern Australia. *Nature*, 251, 222–223, <https://doi.org/10.1038/251222a0>, 1974.
- Kershaw, A.P.: A late Pleistocene and Holocene pollen diagram from Lynch's Crater, north-eastern Australia. *New Phytologist*, 77, 469–493, <https://doi.org/10.1111/j.1469-8137.1976.tb01534.x>, 1976.
- Kershaw, A.P.: A Holocene pollen diagram from Lynch's Crater, north-eastern Queensland, Australia. *New Phytol.*, 94, 669–682, <https://doi.org/10.1111/j.1469-8137.1983.tb04875.x>, 1983.
- Kershaw, A.P.: An extended late Quaternary vegetation record from north-eastern Queensland and its implications for the seasonal tropics of Australia. *Proc. Ecol. Soc. Austr.*, 13, 179–189, 1985.
- Kershaw, A.P.: Climatic change and Aboriginal burning in north-east Australia during the last two glacial/interglacial cycles. *Nature*, 322, 47–49, <https://doi.org/10.1038/322047a0>, 1986.
- Kershaw, A.P., Bretherton, S.C., and Van der Kaars, S.: A complete pollen record of the last 230 ka from Lynch's Crater, north-eastern Australia. *Palaeogeogr. Palaeoclimatol. Palaeoecol.*, 251, 23–45, <https://doi.org/10.1016/j.palaeo.2007.02.015>, 2007.
- Kershaw, A.P., McKenzie, G.M., Brown, J., Roberts, R.G., and Van der Kaars, S.: Beneat the peat; a refined pollen record from an interstadial at Caledonia Fen, highland eastern Victoria, Australia. *Terra Australis*, 32, 33–48, <http://press.anu.edu.au/wp-content/uploads/2011/02/ch0318.pdf>, 2010.
- Kershaw, P., and Van der Kaars, S.: Pollen records, late Pleistocene, Australia and New Zealand. In: Elias, S.A (ed.), *Encyclopedia of Quaternary Science*, Vol. 4, pp. 2613–2623, Elsevier, Amsterdam, 2007.
- Khursevich, G. K., Karabanov, E. B., Prokopenko, A. A., Williams, D. F., Kuzmin, M. I., Fedenya, S. A., and Gvozdkov, A. A.: Insolation regime in Siberia as a major factor controlling diatom production in Lake Baikal during the past 800,000 years. *Quat. Intern.*, 80–81, 47–58, doi: 10.1016/S1040-6182(01)00018-0, 2001.
- Kitagawa H., Fukuzawa, H., Nakamura, T., Okamura, M., Takemura, K. Hayashida, A., and Yasuda, Y.: AMS  $^{14}\text{C}$  dating of varved sediments from Lake Suigetsu, central Japan and atmospheric  $^{14}\text{C}$  change during the Late Pleistocene. *Radiocarbon*, 37, 371–378, doi: <https://doi.org/10.1017/S0033822200030848>, 1995.
- Kitagawa, H., and Van der Plicht, J.: Atmospheric radiocarbon calibration to 45,000 yr BP: late Glacial fluctuations and cosmogenic isotope production. *Science*, 279, 1187–1190, <https://doi.org/10.1126/science.279.5354.1187>, 1998a.
- Kitagawa, H., and Van der Plicht, J.: A 40,000-year varve chronology from Lake Suigetsu, Japan: extension of the  $^{14}\text{C}$  calibration curve. *Radiocarbon*, 40, 505–515, <https://doi.org/10.1017/S0033822200018385>, 1998b.
- Kitagawa, H., and Van der Plicht, J.: Atmospheric radiocarbon calibration beyond 11,900 cal BP from Lake Suigetsu laminated sediments. *Radiocarbon*, 42, 370–381, <https://doi.org/10.1017/S0033822200030319>, 2000.
- Koeberl, C., Milkereit, B., Overpeck, J.T., Scholz, C.A., Amoako, P.Y.O., Boamah, D., Danuor, S.K., Karp, T., Kueck, J., Hecky, R.E., King, J.W., and Peack, J.A.: An international and multidisciplinary drilling project into a young complex impact structure: the 2004 ICDP Bosumtwi Crater Drilling Project; an overview. *Meteor. Planet. Sci.*, 42, 483–511, <https://doi.org/10.1111/j.1945-5100.2007.tb01057.x>, 2007.
- Koeberl, C., Pittarello, L., Reimold, W.U., Raschke, U., Brigham-Grette, J., Melles, M., Minyuk, P., and Spray, J.: El'gygytyn impact crater, Chukotka, Arctic Russia: impact cratering aspects of the 2009 ICDP drilling project. *Meteor. Planet. Sci.*, 48, 1108–1129, doi: 10.1111/maps.12146, 2013.
- Koeberl, C., Peck, J., Jing, J., Milkereit, B., Overpeck, J., and Scholz, C.: The ICDP Lake Bosumtwi Drilling Project: a first report. *Sci. Dril.*, 1, 23–27, doi: 10.2204/iodp.sd.1.04.2005, 2005.

- Kowalewska, A., and Cohen, A.S.: Reconstruction of paleoenvironments of the Great Salt Lake Basin during the late Cenozoic. *J. Paleolim.*, 20, 381–407, doi: 10.1023/a:1008053505320, 1998.
- Lacey, J.H., Francke, A., Leng, M.J., Vane, C.H., and Wagner, B.: A high-resolution Late Glacial to Holocene record of environmental change in the Mediterranean from Lake Ohrid (Macedonia, Albania). *Int. J. Earth Sci.*, 104, 1623–1638, <https://doi.org/10.1007/s00531-014-1033-6>, 2015.
- Lebamba, J., Vincens, A., and Maley, J.: Pollen, vegetation change and climate at Lake Barombi Mbo (Cameroon) during the last ca. 33,000 cal yr BP: a numerical approach, *Clim. Past*, 8, 59–78, doi:10.5194/cp-8-59-2012, 2012.
- Ledru, M.-P.: Modifications de la végétation du Brésil Central entre la dernière époque glaciaire et l'interglaciaire actuel. *Comp. Rend. Acad. Sci. Paris Série II*, 314, 117–123, 1992.
- Ledru, M.-P.: Late Quaternary environmental and climatic changes in central Brazil. *Quat. Res.*, 39, 90–98, <https://doi.org/10.1006/qres.1993.1011>, 1993.
- Ledru, M.P., Behling, H., Fournier, M., Martin, L., and Servant, M.: Localisation de la forêt d'Araucaria du Brésil au cours de l'Holocène – implications paléoclimatiques. *Comp. Rend. Acad. Sci., Séries III, Sciences de la Vie*, 317, 517–521, 1994.
- Ledru, M.-P., Soares Braga, P.I., Soubiès, F., Fournier, M., Martin, L., Suguio, K., and Turcq, B.J.: The last 50,000 years in the Neotropics (Southern Brazil): evolution of vegetation and climate. *Palaeogeogr. Palaeoclimatol. Palaeoecol.*, 123, 239–257, [https://doi.org/10.1016/0031-0182\(96\)00105-8](https://doi.org/10.1016/0031-0182(96)00105-8), 1996.
- Lézine, A.M., Izumi, K., Kageyama, M., and Achoundong, G.: A 90,000-year record of Afromontane forest responses to climate change. *Science*, 363, 177–181, doi: 10.1126/science.aav6821, 2019.
- Litt, T., and Anselmetti, F.S.: Lake Van deep drilling project PALEOVAN. *Quat. Sci. Rev.*, 104, 1–7, <https://doi.org/10.1016/j.quascirev.2014.09.026>, 2014.
- Litt, T., Ohlwein, C., Neumann, F.H., Hense, A., and Stein, M.: Holocene climate variability in the Levant from the Dead Sea pollen record. *Quat. Sci. Rev.*, 49, 95–105, <https://doi.org/10.1016/j.quascirev.2012.06.012>, 2012.
- Litt, T., and Ohlwein, C.: Pollen as palaeoclimate indicators in the Levant. In: Enzel, Y., Bar-Yosef, O. (eds.), *Quaternary of the Levant: environments, climate change, and humans*. Cambridge Univ. Press, Cambridge, UK, pp. 337–345, 2017.
- Litt, T., Pickarski, N., Heumann, G., Stockhecke, M., and Tzedakis, P. C.: A 600,000 year long continental pollen record from Lake Van, eastern Anatolia (Turkey). *Quat. Sci. Rev.*, 104, 30–41, <https://doi.org/10.1016/j.quascirev.2014.03.017>, 2014.
- Litwin, R.J., Adam, D.P., Frederiksen, N.O., and Woolfenden, W.B.: An 800,000-year paleoclimatic record from core OL-92, Owens Lake, Southeast California. *Geol. Soc. Am. Sp. Pap.*, 317, <https://doi.org/10.1130/SPE317>, 1997.
- Liu, X., Shen, J., Wang, S., Yang, X., Tong, G., and Zhang, E.: A 16,000-year pollen record of Quinghai Lake and its paleoclimate and paleoenvironment. *Chinese Sci. Bull.*, 47, 1931–1936, doi:10.1360/02tb9421, 2002.
- Lona, F.: Contributi alla storia della vegetazione e del clima nella Val Padena; Analisi pollinica delgiacimento villa-franchiano de leffe (Bergamo). *Atti della Societa Italiana di Scienze Naturali*, 89, 123–178, 1950.
- Lona, F., Follieri, M.: Successione pollinica della serie superiore (Günz-Mindel) di Leffe (Bergamo). *Veröff. Geobotan. Inst. Rübel Zürich*, 34, 86–98, 1957.
- Loomis, S.E., Russell, J.M., Eggemont, H., Verschuren, D., and Sinninghe Damste, J.S.: Effects of temperature, pH and nutrient concentration on branched GDGT distributions in East African lakes: implications for paleoenvironmental reconstructions. *Org. Geochem.*, 66, 25–37, <https://doi.org/10.1016/j.orggeochem.2013.10.012>, 2014.
- Loomis, S., Russell, J.M., Ladd, B., Street-Perrott, F.A., and Sinninghe Damsté, J.S.: Calibration and application of the branched GDGT temperature proxy on East African lake sediments. *Earth Planet. Sci. Lett.*, 357–358, 277–288, doi:10.1016/j.epsl.2012.09.031, 2012.
- Lozano-García, M. del S., and Ortega-Guerrero, B.: Late Quaternary environmental changes of the central part of the Basin of Mexico; correlation between Texcoco and Chalco basins. *Rev. Palaeobot. Palynol.*, 99, 77–93, doi: [10.1016/S0034-6667\(97\)00046-8](https://doi.org/10.1016/S0034-6667(97)00046-8), 1998.

- Lozano-García, M. del S., Ortega-Guerrero, B., and Sosa-Nájera, S.: Mid- to Late-Wisconsin pollen record of San Felipe Basin, Baja California. *Quat. Res.*, 58, 84–92, doi:10.1006/qres.2002.2361, 2002.
- Lozhkin, A. V. and Anderson, P.M.: Vegetation responses to interglacial warming in the Arctic: examples from Lake El'gygytyn, Far East Russian Arctic. *Clim. Past*, 9, 1211–1219, doi: 10.5194/cp-9-1211-2013, 2013.
- Lozhkin, A.V., Anderson, P.M., Matrosova, T.V., and Minyuk, P.S.: The pollen record from El'gygytyn Lake; implications for vegetation and climate histories of northern Chukotka since the late Middle Pleistocene. *J. Paleolim.*, 37, 135–153, doi:10.1007/s10933-006-9018-5, 2007.
- Lozhkin, A.V., and Anderson, P.M.: Pollen records, late Pleistocene, northern Asia. In: Elias, S.A. (ed.), *Encyclopedia of Quaternary Science*, Vol. 4, pp. 2623–2633, Elsevier, Amsterdam, 2007.
- Lyons, R.P., Scholz, C.A., Buoniconti, M.R., and Martin, M.R.: Late Quaternary stratigraphic analysis of the Lake Malawi Rift, East Africa: an integration of drill-core and seismic-reflection data. *Palaeogeogr. Palaeoclimatol. Palaeoecol.*, 303, 20–37, doi: 10.1016/j.palaeo.2009.04.014, 2011.
- Mackay, A.W.: The paleoclimatology of Lake Baikal: a diatom synthesis and prospectus. *Earth-Sci. Rev.*, 82, 181–215, <https://doi.org/10.1016/j.earscirev.2007.03.002>, 2007.
- Magri, D.: Late Quaternary vegetation history at Lagaccione near Lago di Bolsena (central Italy). *Rev. Palaeobot. Palynol.*, 106, 171–208, [https://doi.org/10.1016/S0034-6667\(99\)00006-8](https://doi.org/10.1016/S0034-6667(99)00006-8), 1999.
- Magri, D., Kallel, N., and Narcisi, B.: Palaeoenvironmental changes in the Mediterranean region 250–10 kyr BP. In: Battarbee, R.W. et al. (eds.), *Past climate variability through Europe and Africa*, pp. 325–341, Kluwer, Dordrecht, [https://doi.org/10.1007/978-1-4020-2121-3\\_16](https://doi.org/10.1007/978-1-4020-2121-3_16), 2004.
- Magri, D., and Sadori, L.: Late Pleistocene and Holocene pollen stratigraphy at Lago di Vico, central Italy. *Veget. Hist. Archaeobot.*, 8, 247–260, <https://doi.org/10.1007/BF01291777>, 1999.
- Magri, D., and Tzedakis, P.C.: Orbital signatures and long-term vegetation patterns in the Mediterranean. *Quat. Intern.*, 73–74, 69–78, [https://doi.org/10.1016/S1040-6182\(00\)00065-3](https://doi.org/10.1016/S1040-6182(00)00065-3), 2000.
- Maley, J.: Etudes palynologiques dans le bassin du Tchad et paléoclimatologie de l'Afrique nordtropicale de 30.000 ans à l'époque actuelle. *Trav. Docum. ORSTOM Paris*, 129, 586 pp., 1981.
- Maley, J.: The African rain forest vegetation and palaeoenvironments during late Quaternary. *Clim. Change*, 19, 79–98, <https://doi.org/10.1007/BF00142216>, 1991.
- Maley, J., and Brenac, P.: Vegetation dynamics, palaeoenvironmental and climatic changes in the forests of western Cameroon during the last 28,000 years BP. *Rev. Palaeobot. Palynol.*, 99, 157–187, 1998.
- Maley, J., and Livingstone, D.A.: Extension d'un élément montagnard dans le sud du Ghana (Afrique de l'Ouest) au Pleistocène supérieur et à l'Holocène inférieur: premières données polliniques. *Compte Rendu Société Séances Académie, Série II* 296, 1287–1292, 1983.
- Maley, J., Livingstone, D.A., Giresse, P., Thouveny, N., Brenac, P., Kelts, K., Kling, G., Stager, C., Haag, M., Fournier, M., Bandet, Y., Williamson, D., and Zogning, A.: Lithostratigraphy, volcanism, paleomagnetism and palynology of Quaternary lacustrine deposits from Barombi Mbo (West Cameroon): preliminary results. *J. Volcanol. Geoth. Res.*, 42, 319–335, doi: 10.1016/0377-0273(90)90030-J, 1990.
- Margalef, O., Cañellas-Boltà, N., Pla-Rabes, S., Giral, S., Pueyo, J.J., Joosten, H., Rull, V., Buchaca, T., Hernández, A., Valero-Garcés, B.L., Moreno, A., and Sáez, A.: A 70,000 year multiproxy record of climatic and environmental change from Rano Aroi peatland (Easter Island). *Glob. Planet. Change*, 108, 72–84, doi: 10.1016/j.gloplacha.2013.05.016, 2013.
- Margalef, O., Martínez Cortizas, A., Kylander, M., Pla-Rabes, S., Cañellas-Boltà, N., Pueyo, J.J., Sáez, A., Valero-Garcés, B.L., and Giral, S.: Environmental processes in Rano Aroi (Easter Island) peat geochemistry forced by climate variability during the last 70 kyr. *Palaeogeogr. Palaeoclimatol. Palaeoecol.*, 414, 438–450, doi: 10.1016/j.palaeo.2014.09.025, 2014.
- Marshall, M., Scholaut, G., Nakagawa, T., Lamb, H., Brauer, A., Staff, R., Bronk Ramsey, C., Tarasov, P., Gotanda, K., Haraguchi, T., Yokoyama, Y., Yonenobu, H., Tada, R., and Suigetsu 2006 Project members: A novel approach to varve counting using  $\mu$ XRF and X-radiography in

- combination with thin-section microscopy, applied to the Late Glacial chronology from Lake Suigetsu, Japan. *Quat. Geochron.*, 13, 70-80, <https://doi.org/10.1016/j.quageo.2012.06.002>, 2012.
- Martin, P.S.: Geochronology of pluvial Lake Cochise, southern Arizona, II. Pollen analysis of a 42-meter core. *Ecology*, 44, 436-444, <https://doi.org/10.2307/1932522>, 1963.
- Martin-Jones, C., Lane, C., Van Daele, M., van der Meeren, T., Wolff, C., Moorhouse, H., Tomlinson, E., and Verschuren, D.: History of scoria-core eruptions on the eastern shoulder of the Kenya-Tanzania rift revealed in the 250-ka sediment record of Lake Challa near Mount Kilimanjaro. *J. Quat. Sci.*, 35, 245-255, doi: 10.1002/jqs.3140, 2020.
- Martin-Puertas, C., Brauer, A., Wulf, S., Ott, F., Lauterbach, S., and Dulski, P.: Annual proxy data from Lago di Monticchio (southern Italy) between 76 and 112 ka: new chronological constraints and insights on abrupt climatic oscillations. *Clim. Past*, 10, 2099-2114, <https://doi.org/10.5194/cp-10-2099-2014>, 2014.
- Mayle, F.E., Burbridge, R., and Killeen, T.J.: Millennial-scale dynamics of southern Amazonian rain forests. *Science*, 290, 2291-2294, <https://doi.org/10.1126/science.290.5500.2291>, 2000.
- Mayle, F.E., Langstroth, R.P., Fisher, R.A., and Meir, P.: Long-term forest-savannah dynamics in the Bolivian Amazon: implications for conservation. *Phil. Trans. Roy. Soc. B: Biological Sciences*, 362, 291-307, doi:10.1098/rstb.2006.1987, 2007.
- McAndrews, J.H.: Human disturbance of North American forest and grasslands: the fossil pollen record. In: Huntley, B. and Webb III, T. (eds.), *Vegetation History. Handbook for Vegetation Science* 7, 673-697, 1988.
- McLean, D., Albert, P.G., Nakagawa, T., Suzuki, T., Staff, R.A., Yamada, K., Kitaba, I., Haraguchi, T., Kitagawa, J., SG14 Project members, and Smith V.C.: Integrating the Holocene tephrostratigraphy for East Asia using a high-resolution cryptotephra study from Lake Suigetsu (SG14 core), central Japan. *Quat. Sci. Rev.*, 183, 36-58, <https://doi.org/10.1016/j.quascirev.2017.12.013>, 2018.
- McLean, D., Albert, P.G., Suzuki, T., Nakagawa, T., Kimura, J.-I., Chang, Q., Miyabuchi, Y., Manning, C.J., MacLoad, A., Blockley, S.P.E., Staff, R.A., Yamada, K., Kitaba, I., Yamasaki, A., Haraguchi, T., and Kitagawa, J., SG14: Constraints on the timing of explosive volcanism at Aso and Aita calderas (Japan) between 50 and 30 ka: new insights from the Lake Suigetsu sedimentary record. *Geochem. Geophys. Geost.*, 21, <https://doi.org/10.1029/2019GC008874>, 2020.
- Meadows, M.E., and Chase, B.M.: Pollen records, late Pleistocene, Africa. In: Elias, S.A. (ed.), *Encyclopedia of Quaternary Science*, Vol. 4, pp. 2606-2613. Elsevier, Amsterdam, 2007.
- Melles, M., Brigham-Grette, J., Glushkova, O.Y., Minyuk, P.S., Nowaczyk, N.R., and Hubberten, H.W.: Sedimentary geo- chemistry of core PG1351 from Lake El'gygytyn - a sensitive record of climate variability in the East Siberian Arctic during the past three glacial-interglacial cycles. *J. Paleolim.*, 37, 89-104, doi: 10.1007/s10933-006-9025-6, 2007.
- Melles, M., Brigham-Grette, J., Minyuk, P., Koeberl, C., Andreev, A., Cook, T., Fedorov, G., Gebhardt, C., Haltia-Hovi, E., Kukkonen, M., Nowaczyk, N., Shwamborn, G., and Wennrich, V.: The Lake El'gygytyn Scientific Drilling Project; conquering Arctic challenges through continental drilling. *Sci. Dril.*, 11, 29- 40, doi: 10.2204/iodp.sd.11.03.2011, 2011.
- Melles, M., Brigham-Grette, J., Minyuk, P.S., Nowaczyk, N.R., Wennrich, V., DeConto, R. M., Anderson, P.M., Andreev, A.A., Coletti, A., Cook, T.L., Haltia-Hovi, E., Kukkonen, M., Lozhkin, A.V., Rösen, P., Tarasov, P., Vogel, H., and Wagner, B.: 2.8 million years of Arctic climate change from Lake El'gygytyn, NE Russia. *Science*, 337, 315-320, doi: 10.1126/science.1222135, 2012.
- Metcalfe, S.E., Bimpson, A., Courtice, A.J., O'Hara, S.L., and Taylor, D.M.: Climate change at the monsoon westerly boundary in northern Mexico. *J. Paleolim.*, 17, 155-171, doi: [10.1023/A:1007905824147](https://doi.org/10.1023/A:1007905824147), 1997.
- Metcalfe, S.E., Say, A., Black, S., McCulloch, R., and O'Hara, S. Wet conditions during the last glaciation in the Chihuahuan Desert, Alta Babicora Basin, Mexico. *Quat. Res.*, 57, 91-101, doi:10.1006/qres.2001.2292, 2002.
- Migowski, C., Stein, M., Prasad, S., Negendank, J.F.W., and Agnon, A.: Holocene climate variability and cultural evolution in the Near East from the Dead Sea sedimentary record. *Quat. Res.*, 66, 421-431, doi:10.1016/j.yqres.2006.06.010, 2006.



- Miller, C.S., and Gosling, W.D.: Quaternary forest associations in lowland tropical West Africa. *Quat. Sci. Rev.*, 84, 7–25, <https://doi.org/10.1016/j.quascirev.2013.10.027>, 2014.
- Milner, A. M., Collier, R. E. L., Roucoux, K.H., Müller, U. C., Pross, J., Christanis, K., and Tzedakis, P. C.: Enhanced seasonality of precipitation in the Mediterranean during the early part of the Last Interglacial. *Geology*, 40, 919–922, <https://doi.org/10.1130/G33204.1>, 2012.
- Milner, A. M., Müller, U. C., Roucoux, K. H., Collier, R. E. L., Pross, J., Kalaitzidis, S., Christanis, K., and Tzedakis, P. C.: Environmental variability during the Last Interglacial: A new high-resolution pollen record from Tenaghi Philippon, Greece. *J. Quat. Sci.*, 28, 113–117, <https://doi.org/10.1002/jqs.2617>, 2013.
- Miranda, C.C.: Sedimentologia, isótopos estáveis e palinologia de depósitos Quaternários no leste da Ilha do Marajó, Estado do Pará. Unpublished Ph.D. dissertation, Universidade de São Paulo, São Paulo, Brazil, 233 pp, 2010.
- Moernaut, J., Verschuren, D., Charlet, F., Kristen, I., Fagot, M., and De Batist, M.: The seismic-stratigraphic record of lake-level fluctuations in Lake Challa: hydrological stability and change in equatorial East Africa over the last 140 kyr. *Earth Planet. Sci. Lett.*, 290, 214–223, doi: 10.1016/j.epsl.2009.12.023, 2010.
- Mommersteeg, H.J.P.M., and Hooghiemstra, H.: The Fúquene-7 high resolution pollen record (0–85 ka) from the Colombian Eastern Cordillera. In: Mommersteeg, H.J.P.M., Vegetation development and cyclic and abrupt climate change during the late Quaternary. PhD thesis, Univ. Amsterdam, pp. 31–59, 1998a.
- Mommersteeg, H.J.P.M., and Hooghiemstra, H.: The Funza-2A high resolution pollen record (25–170 ka) from the Colombian Eastern Cordillera. In: Mommersteeg, H.J.P.M., Vegetation development and cyclic and abrupt climate change during the late Quaternary. PhD thesis, Univ. Amsterdam, pp. 61–100, 1998b.
- Mommersteeg, H.J.P.M., and Hooghiemstra, H.: Climatic change and vegetation development during the last interglacial-glacial cycle in the eastern Cordillera of Colombia. In: Mommersteeg, H.J.P.M., Vegetation development and cyclic and abrupt climate change during the late Quaternary. PhD thesis, Univ. Amsterdam, pp. 101–144, 1998c.
- Mommersteeg, H.J.P.M., Loutre, M.F., Baert, E., Berger, A., and Hooghiemstra, H.: Orbital forcing and abrupt climatic change during the last 170,000 years; Evidence from high-resolution palynological records of the Colombian Eastern Cordillera. In: Mommersteeg, H.J.P.M., Vegetation development and cyclic and abrupt climate change during the Late Quaternary. PhD thesis, Univ. Amsterdam, pp. 145–169, 1998.
- Mommersteeg, H. J. P. M., Loutre, M. F., Young, R., Wijmstra, T. A., and Hooghiemstra, H.: Orbital forced frequencies in the 975,000 year pollen record from Tenaghi Philippon (Greece). *Clim. Dyn.*, 11, 4–24, <https://hdl.handle.net/11245/1.113135>, 1995.
- Monsalve, J. G.: A pollen core from the Hacienda Lusitania. *Pro Calima* 5, 40–44, 1985.
- Moss, P.T., and Kershaw, A.P.: The last glacial cycle from the humid tropics of northeastern Australia; comparison of a terrestrial and a marine record. *Palaeogeogr. Palaeoclimatol. Palaeoecol.*, 155, 155–176, [https://doi.org/10.1016/S0031-0182\(99\)00099-1](https://doi.org/10.1016/S0031-0182(99)00099-1), 2000.
- Mourguiart, P., and Ledru, M.-P.: Last glacial maximum in an Andean cloud forest environment (Eastern Cordillera, Bolivia). *Geology* 31, 195–198, [https://doi.org/10.1130/0091-7613\(2003\)031<0195:LGMIAA>2.0.CO;2](https://doi.org/10.1130/0091-7613(2003)031<0195:LGMIAA>2.0.CO;2), 2003.
- Muiruri, V.M., Owen, R.B., Lowenstein, T.K., Renaut, R.W., Marchant, R., Rucina, S.M., Cohen, A., Deino, A.L., Sier, M.J., Luo, S., Leet, K., Campisano, C., Rabidaux, N.M., Deocampo, D., Shen, C.-C., Mbuthia, A., Dacis, B.C., Aldossari, W., and Wang, C.: A million year vegetation history and palaeoenvironmental record from the Lake Magadi Basin, Kenya Rift Valley. *Palaeogeogr. Palaeoclimatol. Palaeoecol.*, 567, doi.org/10.1016/j.palaeo.2021.110247, 2021.
- Müller, U.C., Pross, J., and Bibus, E.: Vegetation response to rapid climate change in central Europe during the past 140,000 yr based on evidence from the Füramoos pollen record. *Quat. Res.*, 59, 235–245, doi: [https://doi.org/10.1016/S0033-5894\(03\)00005-X](https://doi.org/10.1016/S0033-5894(03)00005-X), 2003.
- Nakagawa, T., Gotanda, K., Haraguchi, T., Danhara, T., Yonenobu, H., Brauer, A., Yokoyama, Y., Tada, R., Takemura, K., Staff, R.A., Payne, R., Bronk Ramsey, C., Bryant, C., Brock, F., Schlolaut, G., Marshall, M., Tarasov, P., Lamb, H., and Suigetsu 2006 Project Members.: SG06, a fully continuous and varved sediment core from Lake Suigetsu, Japan: stratigraphy

- and potential for improving the radiocarbon calibration model and understanding of late Quaternary climate changes. *Quat. Sci. Rev.*, 36, 164–176, <https://doi.org/10.1016/j.quascirev.2010.12.013>, 2012.
- Nakagawa, T., Kitagawa, H., Yasuda, Y., Tarasov, P.E., Gotanda, K., and Sawai, Y.: Pollen/event stratigraphy of the varved sediment of Lake Suigetsu, Central Japan from 15,701 to 10,217 SG kyr BP (Suigetsu varve years before present): description, interpretation, and correlation with other regions. *Quat. Sci. Rev.*, 24, 1691–1701, <https://doi.org/10.1016/j.quascirev.2004.06.022>, 2005.
- Nakagawa, T., and Suigetsu 2006 Project Members: High-precision sampling of laminated sediments: strategies from Lake Suigetsu. *PAGES News*, 22, 12–13, 2014.
- Nakagawa, T., Kitagawa, H., Payne, R., Tarasov, P., Demske, D., and Suigetsu 2006 Project Members: A standard sample method for controlling microfossil data precision: a proposal for higher data quality and greater opportunities for collaboration. *Quat. Intern.*, 290–291, 239–244, <https://doi.org/10.1016/j.quaint.2012.10.056>, 2013.
- Nakagawa, T., Kitagawa, H., Yasuda, Y., Tarasov, P.E., Nishida, K., Gotanda, K., Sawai, Y., and Yangtze River Civilization Program Members: Asynchronous climate changes in the North Atlantic and Japan during the Last Termination. *Science*, 299, 688–691, doi: 10.1126/science.1078235, 2003.
- Nakagawa, T., Tarasov, P.E., Nishida, K., Gotanda, K., and Yasuda, Y.: Quantitative pollen-based climate reconstruction in Central Japan: application to surface and Late Quaternary spectra. *Quat. Sci. Rev.*, 21, 2099–2113, [https://doi.org/10.1016/S0277-3791\(02\)00014-8](https://doi.org/10.1016/S0277-3791(02)00014-8), 2002.
- Nakagawa, T., Tarasov, P., Staff, R., Bronk Ramsey, R., Marshall, M., Scholaut, G., Bryant, C., Brauer, A., Lamb, H., Haraguchi, T., Gotanda, K., Kitaba, I., Kitagawa, H., Van der Plicht, J., Yonenobu, H., Omori, T., Yokoyama, Y., Tada, R., Yasuda, Y., and Suigetsu 2006 Project Members: The spatio-temporal structure of the early Holocene transition reconstructed from the pollen record of Lake Suigetsu and its precise correlation with other key global archives: implications for palaeoclimatology and archaeology. *Glob. Planet. Change*, 202, <https://doi.org/10.1016/j.gloplacha.2021.103493>, 2021.
- Nakagawa, T., Gotanda, K., Haraguchi, T., Dasnhara, T., Yonenobu, H., Brauer, A., Yokoyama, Y., Tada, R., Takemura, K., Staff, R.A., Oayne, R., Bronk Ramsey, C., Bryant, C., Brock, F., Scholaut, G., Marshall, M., Tarasov, P., Lamb, H., and Suigetsu 2006 Project Members: SG06, a fully continuous and varved sediment core from Lake Suigetsu, Japan: stratigraphy and potential for improving the radiocarbon calibration model and understanding of late Quaternary climate changes. *Quat. Sci. Rev.*, 36, 164–176, <https://doi.org/10.1016/j.quascirev.2010.12.013>, 2012.
- Neugebauer, I., Brauer, A., Schwab, M. J., Waldmann, N. D., Enzel, Y., Kitagawa, H., Torfstein, A., Frank, U., Dulski, P., Agnon, A., Ariztegui, D., Ben-Avraham, Z., Golstein, S. L., Stein, M., and DSDDP Scientific Party: Lithology of the long sediment record recovered by the ICDP Dead Sea Deep Drilling Project (DSDDP). *Quat. Sci. Rev.*, 102, 149–165, <https://doi.org/10.1016/j.quascirev.2014.08.013>, 2014.
- Newnham, R.: Environmental change in Northland, New Zealand during the last glacial and Holocene. *Quat. Intern.*, 57–58, 61–70, [https://doi.org/10.1016/S1040-6182\(98\)00050-0](https://doi.org/10.1016/S1040-6182(98)00050-0), 1999.
- Nowaczyk, N.R., Haltia, E.M., Ulbricht, D., Wennrich, V., Sauerbrey, M.A., Rosén, P., Vogel, H., Francke, A., Meyer-Jacob, C., Andreev, A.A., and Lozhkin, A. V.: Chronology of Lake El'gygytyn sediments; a combined magnetostratigraphic, palaeoclimatic and orbital tuning study based on multi-parameter analyses. *Clim. Past*, 9, 2413–2432, doi: 10.5194/cp-9-2413-2013, 2013.
- Nowaczyk, N.R., Minyuk, P., Melles, M., Brigham-Grette, J., Glushkova, O., Nolan, M., Lozhkin, A. V., Stetsenko, T. V., M. Andersen, P., Forman, S.L., Andersen, P.M., and Forman, S.L.: Magnetostratigraphic results from impact crater Lake El'gygytyn, northeastern Siberia: a 300 kyr long high-resolution terrestrial palaeoclimatic record from the Arctic. *Geoph. J. Intern.*, 150, 109–126, doi: 10.1046/j.1365-246X.2002.01625.x, 2002.
- Oberhänsli, H., and Molnar, P.: Climate evolution in Central Asia during the past few million years: a case study from Issyk Kul. *Sci. Dril.*, 13, 51–57, doi: 10.5194/sd-13-51-2012, 2012.
- Ohngemach, D., and Straka, H. Beiträge zur Vegetations und Klimageschichte im Gebiet von Puebla-Tlaxcala. *Pollen Analysen im Mexico-Projekt*. Steiner, Wiesbaden, 165 pp, 1983.

- Okuda, M. Yasuda, Y., Setoguchi, T.: Middle to late Pleistocene vegetation history and climate changes at Lake Kopais, southeast Greece. *Boreas*, 30, 73-82, doi:10.1111/j.1502-3885.2001.tb00990.x, 2001.
- Oliveira, M.A.T. de, Porsani, J.L., de Lima, G.L., Jeske-Pieruschka, V., and Behling, H.: Upper Pleistocene to Holocene peatland evolution in southern Brazilian highlands as depicted by radar stratigraphy, sedimentology and palynology. *Quat. Res.*, 77, 397–407, doi:10.1016/j.yqres.2011.12.006, 2012.
- Ortega, B., Caballero, C., Lozano, S., Israde, I., and Vilaclara, G.: 52,000 years of environmental history in Zacapu Basin, Michoacan, Mexico: the magnetic record. *Earth Planet. Sci. Let.*, 202, 663–675, 2002.
- Ortiz, J.E., Torres, T., Huertas, A.D., and Llamas, J.F.: Palaeoenvironmental changes in the Padul Basin (Grenada, Spain) over the last 1 Ma based on the biomarker content. *Palaeogeogr. Palaeoclimatol. Palaeoecol.*, 298, 286-299, <https://doi.org/10.1016/j.palaeo.2010.10.003>, 2010.
- Oviatt, C.G.: Laker Bonneville fluctuations and global climate change. *Geology*, 25, 155-158, [https://doi.org/10.1130/0091-7613\(1997\)025<0155:LBFAGC>2.3.CO;2](https://doi.org/10.1130/0091-7613(1997)025<0155:LBFAGC>2.3.CO;2), 1997.
- Owen, R.B., Muiruri, V.M., Lowenstein, T.K., Renaut, R.W., Rabideaux, N., Luo, S., Deino, A.L., Sier, M.J., Dupont-Nivet, G., McNulty, E.P., Leet, K., Cohen, A., Campisano, C., Deocampo, D., Shen, C.C., Billingsley, A., and Mbuthia, A.: Progressive aridification in East Africa over the last half million years and implications for human evolution. *Proc. Nat. Acad. Sci. USA*, 115, 11174, <https://doi.org/10.1073/pnas.1801357115>, 2018.
- Owen, R.B., Renaut, R.W., Muiruri, V.M., Rabideaux, N.M., Lowenstein, T.K., McNulty, E.P., Leet, K., Deocampo, D., Luo, S., Deino, A.L., Cohen, A., Sier, M.J., Campisano, C., Shen, C.-C., Billingsley, A., Mbuthia, A., and Stockhecke, M.: Quaternary history of the Lake Magadi Basin, southern Kenya Rift: tectonic and climatic controls. *Palaeogeogr. Palaeoclimatol. Palaeoecol.*, 518, 97-118, <https://doi.org/10.1016/j.palaeo.2019.01.017>, 2019.
- Paduano, G.M., Bush, M.B., Baker, P.A., Fritz, S.C., and Seltzer, G.O.: A vegetation and fire history of Lake Titicaca since the Last Glacial Maximum. *Palaeogeogr. Palaeoclimatol. Palaeoecol.*, 194, 259-279, [https://doi.org/10.1016/S0031-0182\(03\)00281-5](https://doi.org/10.1016/S0031-0182(03)00281-5), 2003.
- Panagiotopoulos, K., Aufgebauer, A., Schäbitz, F., and Wagner, B.: Vegetation and climate history of the Lake Prespa region since the Lateglacial. *Quat. Intern.*, 293, 157–169, doi:10.1016/j.quaint.2012.05.048, 2013.
- Pearson, E., Juggins, S., Talbot, H.N., Weckström, J., Rosén, P., Ryves, D., Roberts, S., and Schmidt, R.: A lacustrine GDGT-temperature calibration from the Scandinavian Arctic to Antarctic: renewed potential for the application of GDGT-paleothermometry in lakes. *Geochim. Cosmochim. Acta*, 75, 6225-6238, doi:10.1016/j.gca.2011.07.042, 2011.
- Pérez-Obiol, R., and Julià, R.: Climatic change on the Iberian peninsula recorded in a 30,000-yr pollen record from Lake Banyoles. *Quat. Res.*, 41, 91-98, doi: <https://doi.org/10.1006/qres.1994.1010>, 1994.
- Peterson, L.C., Haug, G.H., Hughen, K.A., and Röhl, U.: Rapid changes in the hydrologic cycle of the tropical Atlantic during the last glacial. *Science*, 290, 1947–1951, <https://doi.org/10.1126/science.290.5498.1947>, 2000.
- Philips, L.: Vegetational history of the Ipswichian/Eemian interglacial in Britain and continental Europe. *New Phyt.*, 73, 589-604, <https://doi.org/10.1111/j.1469-8137.1974.tb02134.x>, 1974.
- Pickarski, N., and Litt, T.: A new high-resolution pollen sequence at Lake Van, Turkey: insights into penultimate interglacial-glacial climate change on vegetation history. *Clim. Past*, 13, 689-710, <https://doi.org/10.5194/cp-13-689-2017>, 2017.
- Pons, A., and Reille, M.: The Holocene and Upper Pleistocene pollen record from Padul (Granada, Spain): a new study. *Palaeogeogr. Palaeoclimatol. Palaeoecol.*, 66, 243–263, [https://doi.org/10.1016/0031-0182\(88\)90202-7](https://doi.org/10.1016/0031-0182(88)90202-7), 1988.
- Prokopenko A.A., Bezrukova, E.V., Khursevich, G.K., Solotchina, E.P., Kuzmin M.I., and Tarasov, P.E.: Climate in continental interior Asia during the longest interglacial of the past 500,000 years: the new MIS 11 records from Lake Baikal, SE Siberia. *Clim. Past*, 6, 31-48, <https://doi.org/10.5194/cp-6-31-2010>, 2010.
- Prokopenko, A.A., Hinnov, L.A., Williams, D.F., and Kuzmin, M.I.: Orbital forcing of continental climate during the Pleistocene: a complete astronomically tuned climatic record from Lake

- Baikal, SE Siberia. *Quat. Sci. Rev.*, 25, 3431–3457, <https://doi.org/10.1016/j.quascirev.2006.10.002>, 2006.
- Prokopenko, A.A., Karabanov, E.B., Williams, D.F., Kashiwaya, K., Ochiai, S., Sakai, H., and Kawai, T.: Geomorphology: age of long sediment cores from Lake Baikal. *Nature*, 415 976, doi: <https://doi.org/10.1038/415976a>, 2002.
- Prokopenko, A. A., and Williams, D. F.: Deglacial methane emission signals in the carbon isotopic record of Lake Baikal. *Earth Planet. Sci. Lett.*, 218, 135–147, [https://doi.org/10.1016/S0012-821X\(03\)00637-X](https://doi.org/10.1016/S0012-821X(03)00637-X), 2004.
- Prokopenko, A. A., Williams, D. F., Karabanov E. B., and Khursevich, G. K.: Response of Lake Baikal ecosystem to climate forcing and  $p\text{CO}_2$  change over the last glacial/interglacial transition. *Earth Planet. Sci. Lett.*, 172, 239–253, [https://doi.org/10.1016/S0012-821X\(99\)00203-4](https://doi.org/10.1016/S0012-821X(99)00203-4), 1999.<sup>[1]</sup>
- Pross, J., Tzedakis, C., Schmiedl, G., Christanis, K., Hooghiemstra, H., Müller, U.C., Kotthoff, U., Kalaitzidis, S., and Milner, A.: Tenaghi Philippon (Greece) revisited: drilling a continuous lower-latitude terrestrial climate archive of the last 250,000 years. *Sci. Dril.*, 5, 44-46, doi:10.2204/iodp.sd.5.06.2007, 2007.
- Pross, J., Koutsodendris, A., Christanis, K., Fischer, T., Fletcher, W.J., Hardiman, M., Kalaitzidis, S., Knipping, M., Kotthoff, U., Milner, A.M., Müller, U.C., Schmiedl, G., Siavalas, G., Tzedakis, P.C., and Wulf, S.: The 1.35-Ma-long terrestrial climate archive of Tenaghi Philippon, northeastern Greece: evolution, exploration, and perspectives for future research. *Newslet. Stratigr.*, 48, 253-276, doi:10.1127/nos/2015/0063, 2015.
- Quick, L.J., Meadows, M.E., Bateman, M.D., Kirsten, K.L., Mäusbacher, R., Haberzettl, T., and Chase, B.M.: Vegetation and climate dynamics during the last glacial period in the fynbos-afrotemperate forest ecotone, southern Cape, South Africa. *Quat. Intern.*, 404, 136–149, doi:10.1016/j.quaint.2015.08.027, 2016.
- Ravazzi, C., and Rossignol-Strick, M.: Vegetation change in a climatic cycle of early Pleistocene age in the Leffe basin, northern Italy. *Palaeogeogr. Palaeoclimatol. Palaeoecol.*, 117, 105-122, [https://doi.org/10.1016/0031-0182\(94\)00118-R](https://doi.org/10.1016/0031-0182(94)00118-R), 1995.
- Reese, C.A., and Liu, K.B., Thompson, L.G.: An ice-core pollen record showing vegetation response to Late-glacial and Holocene climate changes at Nevado Sajama, Bolivia. *Ann. Glaciol.*, 54, 183-190, <https://doi.org/10.3189/2013AoG63A375>, 2017.
- Reille, M., Andrieu, V., De Beaulieu, J.-L., Guenet, P., and Goeury, C.: A long pollen record from Lac du Bouchet, Massif Central, France, for the period ca. 325 to 100 ka BP (OIS 9c to OIS 5e). *Quat. Sci. Rev.*, 17, 1107-1123, [https://doi.org/10.1016/S0277-3791\(97\)00093-0](https://doi.org/10.1016/S0277-3791(97)00093-0), 1999.
- Reille, M., and De Beaulieu, J.-L.: History of the Würm and Holocene vegetation in western Velay (Massif Central, France): a comparison of pollen analysis from three corings at Lac du Bouchet. *Rev. Palaeobot. Palynol.*, 54, 233-248, [https://doi.org/10.1016/0034-6667\(88\)90016-4](https://doi.org/10.1016/0034-6667(88)90016-4), 1988.
- Reille, M., and De Beaulieu, J.-L.: Long Pleistocene pollen records from the Praclaux Crater, south-central France. *Quat. Res.*, 44, 205-215, <https://doi.org/10.1006/qres.1995.1065>, 1995.
- Reille, M., De Beaulieu, J.-L., Svobodova, H., Andrieu-Ponel, V., and Goeury, C.: Pollen biostratigraphy of the last five climatic cycles from a long continental sequence from the Velay region (Massif Central, France). *J. Quat. Sci.*, 15, 665-685, doi:10.1002/1099-1417(200010)15:7<665::AID-JQS560>3.0.CO;2-G, 2000.
- Reimer, P.J.: Refining the radiocarbon time scale. *Science*, 338, 337-338, doi: 10.1126/science.1228653, 2012.
- Ricketts, R.D., Johnson, T.C., Brown, E.T., Rasmussen, K.A., and Romanovsky, V. V.: The Holocene paleolimnology of Lake Issyk-Kul, Kyrgyzstan: trace element and stable isotope composition of ostracodes. *Palaeogeogr. Palaeoclimatol. Palaeoecol.*, 176, 207–227, doi: 10.1016/S0031-0182(01)00339-X, 2001.
- Rodríguez-Zorro, P.A., Ledru, M.-P., Bard, E., Aquino-Alfonso, O., Camejo, A., Daniau, A.-L., Favier, C., Garcia, M., Mineli, T.D., Rostek, F., Ricardi-Branco, F., Sawakuchi, A.O., Simon, Q., Tachikawa, K., and Thouveny, N.: Shut down of the South American summer monsoon during the penultimate glacial. *Sci. Reports*, 10, 6275, <https://doi.org/10.1038/s41598-020-62888-x>, 2020.



- Rosenbaum, J.G., and Kaufman, D.S. (eds.): Paleoenvironments of Bear Lake, Utah and Idaho, and its catchment. *Geol. Soc. Am., Sp. Pap.*, 450, <https://doi.org/10.1130/SPE450>, 2009.
- Rossetti, D.F., Bertani, T.C., Zani, H., Cremon, E.H., and Hayakawa, E.H.: Late Quaternary sedimentary dynamics in western Amazonia: implications for the origin of open vegetation/forest contrasts. *Geomorphology*, 177-178, 74–92, doi:10.1016/j.geomorph.2012.07.015, 2012.
- Rosenbaum, J., Reynolds, R., Smoot, J., and Meyer, R.: Anisotropy of magnetic susceptibility as a tool for recognizing core deformation: reevaluation of the paleomagnetic record of Pleistocene sediments from drill hole OL-92, Owens Lake, California. *Earth Planet. Sci. Lett.*, 178, 415–424, doi: 10.1016/S0012-821X(00)00077-7, 2000.
- Russell, J.M., Hopmans, E.C., Loomis, S.E., Liang, J., and Sinninghe Damsté, J.S.: Distributions of 5- and 6-methyl branched glycerol dialkyl glycerol tetraethers (brGDGTs) in East African lake sediment: effects of temperature, pH, and new lacustrine paleotemperature calibrations. *Org. Geochem.*, <https://doi.org/10.1016/j.orggeochem.2017.12.003>, 2017.
- Sauerbrey, M.A., Juschus, O., Gebhardt, A.C., Wennrich, V., Nowaczyk, N.R., and Melles, M.: Mass movement deposits in the 3.6 Ma sediment record of Lake El'gygytyn, Far East Russian Arctic. *Clim. Past*, 9, 1949–1967, doi: 10.5194/cp-9-1949-2013, 2013.
- Schlolaut, G., Brauer, A., Nakagawa, T., Lamb, H.F., Tyler, J.J., Staff, R.A., Marshall, M.H., Bronk Ramsey, C., Bryant, C.L., and Tarasov, P.E.: Evidence for a bi-partition of the Younger Dryas stadial in East Asia associated with inversed climate characteristics compared to Europe, *Sci. Reports*, 7, <https://doi.org/10.1038/srep44983>, 2017.
- Schlolaut, G., Staff, R.A., Brauer, A., Lamb, H.F., Marshall, M.H., Bronk Ramsey, C., and Nakagawa, T.: An extended and revised Lake Suigetsu varve chronology from ~50 to ~10 ka BP based on detailed sediment micro-facies analyses. *Quat. Sci. Rev.*, 200, 351–366, <https://doi.org/10.1016/j.quascirev.2018.09.021>, 2018.
- Schlolaut, G., Brauer, A., Marshall, M.H., Nakagawa, T., Staff, R.A., Bronk Ramsey, C., Lamb, H.F., Bryant, C.L., Naumann, R., Dulski, P., Brock, F., Yokoyama, Y., Tada, R., Haraguchi, T., and Suigetsu 2006 Project Members: Event layers in the Japanese Lake Suigetsu SG06 sediment core: description, interpretation and climatic implications. *Quat. Sci. Rev.*, 83, 157–170, <https://doi.org/10.1016/j.quascirev.2013.10.026>, 2014.
- Schlüchter, C.: The most complete Quaternary record of the Swiss Alpine Foreland. *Palaeogeogr. Palaeoclimatol. Palaeoecol.*, 72, 141–146, [https://doi.org/10.1016/0031-0182\(89\)90138-7](https://doi.org/10.1016/0031-0182(89)90138-7), 1989.
- Scholz, C.A., Cohen, A.S., Johnson, T.C., King, J.W., and Moran, K.: The 2005 Lake Malawi Scientific Drilling Project: *Sci. Drill.*, 2, 17–19, doi: 10.5194/sd-2-17-2006, 2006.
- Scholz, C.A., and Finney, B.P.: Late Quaternary sequence stratigraphy of Lake Malawi (Nyasa), Africa. *Sedimentol.*, 41, 163–179, <https://doi.org/10.1111/j.1365-3091.1994.tb01397.x>, 1994.
- Scholz, C.A.A., Cohen, A.S.S., Johnson, T.C.C., King, J., Talbot, M.R.R., and Brown, E.T.T.: Scientific drilling in the Great Rift Valley: the 2005 Lake Malawi Scientific Drilling Project; An overview of the past 145,000 years of climate variability in Southern Hemisphere East Africa. *Palaeogeogr. Palaeoclimatol. Palaeoecol.*, 303, 3–19, doi: 10.1016/j.palaeo.2010.10.030, 2011a.
- Scholz, C.A.A., Talbot, M.R.R., Brown, E.T.T., and Lyons, R.P.P.: Lithostratigraphy, physical properties and organic matter variability in Lake Malawi drillcore sediments over the past 145,000 years. *Palaeogeogr. Palaeoclimatol. Palaeoecol.*, 303, 38–50, doi: 10.1016/j.palaeo.2010.10.028, 2011b.
- Scholz, C.A., Johnson, T.C., Cohen, A.S., King, J.W., Peck, J.A., Overpeck, J.T., Talbot, M.R., Brown, E.T., Kalindekaffe, L., Amoako, P.Y.O., Lyons, R.P., Shanahan, T.M., Castañeda, I.S., Heil, C.W., Forman, S.L., Mchargue, L.R., Beining, K.R., Gomez, J., and Pierson, J.: East African megadroughts between 135 and 75 thousand years ago and bearing on early-modern human origins. *Proc. Nat. Acad. Sci. USA*, 104, 16416–16421, doi: 10.1073/pnas.0703874104, 2007.
- Scholz, C.A., Cohen, A.S., and Johnson, T.C.: Southern hemisphere tropical climate over the past 145 ka: results of the Lake Malawi Scientific Drilling Project, East Africa. *Palaeogeogr. Palaeoclimatol. Palaeoecol.*, 303, 1–2, doi: 10.1016/j.palaeo.2011.01.001, 2011c.

- Schüler, L., Hemp, A., Zech, W., and Behling, H.: Vegetation, climate and fire-dynamics in East Africa inferred from the Maundi crater pollen record from Mt. Kilimanjaro during the last glacial-interglacial cycle. *Quat. Sci. Rev.*, <https://doi.org/10.1016/j.quascirev.2012.02.003>, 2012.
- Scott, L.: Vegetation history and climate in the savanna biome South Africa since 190 ka: a comparison of pollen data from the Tswaing Crater (the Pretoria Saltpan) and Wonderkrater. *Quat. Intern.*, 57-58, 215-223, [https://hdl.handle.net/10520/AJA00382353\\_6166](https://hdl.handle.net/10520/AJA00382353_6166), 1999.
- Scott, L., and Thackeray, J.F.: Multivariate analysis of late Pleistocene and Holocene pollen spectra from Wonderkrater, Transvaal, South Africa. *South Afr. J. Sci.*, 83, 93–98, 1987.
- Scott, L., Holmgren, K., Talma, A.S., Woodborne, S., and Vogel, J.C.: Age interpretation of the Wonderkrater spring sediments and vegetation change in the Savanna Biome, Limpopo Province, South Africa. *South Afr. J. Sci.*, 99, 484–488, 2003.
- Scott, L., Neumann, F.H., Brook, G.A., Bousman, C.B., Norström, E., and Metwally, A.: Terrestrial fossil-pollen evidence of climate change during the last 26 thousand years in southern Africa. *Quat. Sci. Rev.*, 32, 100–118, <https://doi.org/10.1016/j.quascirev.2011.11.010>, 2012.
- Shanahan, T.M., Beck, J.W., Overpeck, J.T., McKay, N.P., Pigati, J.S., Peck, J.A., Scholz, C.A., Heil Jr, C.W., King, J., Heil, C.W., and King, J.: Late Quaternary sedimentological and climate changes at Lake Bosumtwi Ghana: new constraints from laminae analysis and radiocarbon age modeling. *Palaeogeogr. Palaeoclimatol. Palaeoecol.*, 361–362, 49–60, doi: 10.1016/j.palaeo.2012.08.001, 2012.
- Shanahan, T.M., Peck, J.A., McKay, N., Heil Jr., C.W., King, J., Forman, S.L., Hoffmann, D.L., Richards, D.A., Overpeck, J.T., and Scholz, C.: Age models for long lacustrine sediment records using multiple dating approaches; an example from Lake Bosumtwi, Ghana. *Quat. Geochr.*, 15, 47–60, doi: 10.1016/j.quageo.2012.12.001, 2013.
- Shichi, K., Takahara, H., Krivonogov, S. K., Bezrukova, E. V., Kashiwaya, K., Takehara, A., and Nakamura, T.: Late Pleistocene and Holocene vegetation and climate records from Lake Kotokel, central Baikal region, *Quat. Intern.*, doi:10.1016/j.quaint.2009.02.005, 2009.
- Singh, G., and Geissler, E.A.: Late Cainozoic history of fire, lake levels and climate at Lake George, New South Wales, Australia. *Phil. Trans. Roy. Soc. Lond.*, 311, 379-447, <https://doi.org/10.1098/rstb.1985.0156>, 1985.
- Smith, V.C., Staff, R.A., Blockley, S.P.E., Bronk Ramsey, C., Nakagawa, T., Mark, D.F., Takemura, K., Dunhara, T., and Suigetsu 2006 Project members: Identification and correlation of visible tephra in the Lake Suigetsu SG06 sedimentary archive, Japan: chronostratigraphic markers for synchronising of east Asian/west Pacific palaeoclimatic records across the last 150 ka. *Quat. Sci. Rev.*, 67, 121-137, <https://doi.org/10.1016/j.quascirev.2013.01.026>, 2013.
- Snyder, J.A., Cherepanova, M. V., and Bryan, A.: Dynamic diatom response to changing climate 0–1.2 Ma at Lake El'gygytgyn, Far East Russian Arctic. *Clim. Past*, 9, 1309–1319, doi: 10.5194/cp-9-1309-2013, 2013.
- Snyder, J.A., Wasyluk, K., Fritz, S.C., and Wright Jr, H.E.: Diatom-based conductivity reconstruction and palaeoclimatic interpretation of a 40-ka record from Lake Zeribar, Iran. *The Holocene*, 11, 737–745, doi: 10.1191/09596830195753, 2001.
- Staff, R.A., Nakagawa, T., Scholaut, G., Marshall, M.H., Brauer, A., Lamb, H.F., Bronk Ramsey, C., Bryant, C.L., Brock, F., Kitagawa, H., Van der Plicht, J., Payne, R.L., Smith, V.C., Mark, D.F., MacLoad, A., Blockley, S.P.E., Schwenninger, J.-L., Tarasov, P.E., Haraguchi, T., Gotanda, K., Yonenobu, H., Yokoyama, Y., and Suigetsu 2006 Project Members: The multiple chronological techniques applied to the Lake Suigetsu SG06 sediment core, central Japan. *Boreas*, 42, 259-266, <https://doi.org/10.1111/j.1502-3885.2012.00278.x>, 2013.
- Staff, R.A., Scholaut, G., Bronk Ramsey, C., Brock, F., Bryant, C.L., Kitagawa, H., Van der Plicht, J., Marshall, M.H., Brauer, A., Lamb, H.F., Payne, R.L., Tarasov, P.E., Haraguchi, T., Gotanda, K., Yonenobu, H., Yokoyama, Y., Nakagawa, T., and Suigetsu 2006 Project Members: Integration of the old and new Lake Suigetsu (Japan) terrestrial radiocarbon calibration data sets. *Radiocarbon*, 55, 2049-2058, [https://doi.org/10.2458/azu\\_js\\_rc.v55i2.16339](https://doi.org/10.2458/azu_js_rc.v55i2.16339), 2013.

- Staff, R.A., Bronk Ramsey, C., Nakagawa, T., and Suigetsu 2006 Project Members: A re-analysis of the Lake Suigetsu terrestrial radiocarbon calibration dataset. *Nucl. Instrum. Meth. Phys. Res. B*, 268, 960-965, <https://doi.org/10.1016/j.nimb.2009.10.074>, 2010.
- Smith, V.C., Mark, D.F., Staff, R.A., Blockley, S.P.E., Bronk Ramsey, C., Bryant, C.L., Nakagawa, T., Han, K.K., Weh, A., Takemura, K., Danhara, T., and Suigetsu 2006 Project Members: Toward establishing precise  $^{40}\text{Ar}/^{39}\text{Ar}$  chronologies for Late Pleistocene palaeoclimate archives: an example from the Lake Suigetsu (Japan) sedimentary record. *Quat. Sci. Rev.*, 30, 2845-2850, <https://doi.org/10.1016/j.quascirev.2011.06.020>, 2011.
- Stein, M.: The sedimentary and geochemical record of Neogene-Quaternary water bodies in the Dead Sea basin; inferences for the regional paleoclimatic history. *J. Paleolim.*, 26, 271-282, doi:10.1023/A:1017529228186, 2001.
- Stein, M.: The evolution of Neogene-Quaternary water-bodies in the Dead Sea rift valley. In: Garfinkel, Z., Ben-Avraham, Z., Kagan, E. (eds.), *Dead Sea transform fault system: reviews*. Springer, Netherlands, pp. 279-316, 2014.
- Stein, M., Ben-Avraham, Z., Goldstein, S., Agnon, A., Ariztegui, D., Brauer, A., Haug, G., Ito, E., and Yasuda, Y.: Deep drilling at the Dead Sea. *Sci. Dril.*, 11, 46-47, doi: 10.5194/sd-11-46-2011, 2011.
- Stein, M., Starinsky, A., Katz, A., Goldstein, S.L., Machlus, M., and Schramm, A.: Strontium isotopic, chemical, and sedimentological evidence for the evolution of Lake Lisan and the Dead Sea. *Geochim. Cosmochim. Acta*, 61, 3975-3992, [https://doi.org/10.1016/S0016-7037\(97\)00191-9](https://doi.org/10.1016/S0016-7037(97)00191-9), 1997.
- Stockhecke, M., Kwiecien, O., Vigliotti, L., Anselmetti, F. S., Beer, J., Çağatay, M. N., Channell, J. E. T., Kipfer, R., Lachner, J., Litt, T., Pickarski, N., and Sturm, M.: Chronostratigraphy of the 600,000 year old continental record of Lake Van (Turkey). *Quat. Sci. Rev.*, 104, 8-17, <https://doi.org/10.1016/j.quascirev.2014.04.008>, 2014.
- Sulpizio, R., Zanchetta, G., D'Orazio, M., Vogel, H., and Wagner, B.: Tephrostratigraphy and tephrochronology of Lakes Ohrid and Prespa, Balkans. *Biogeosci.*, 7, 3273-3288, <https://doi.org/10.5194/bg-7-3273-2010>, 2010.
- Suzuki, Y., Tada, R., Nagashima, K., Nakagawa, T., Gotanda, K., Haragushi, T., Scholaut, G., and Suigetsu 2006 Project members: Extreme flood events and their frequency variations during the middle to late Holocene recorded in the sediment of Lake Suigetsu, Central Japan. *The Holocene*, 31, <https://doi.org/10.1177/0959683620961497>, 2021.
- Sylvestre, F., Schuster, M., Vogel, H., Abdheramane, M., Ariztegui, D., Salzmann, U., Schwalb, A., Waldmann, N., and ICDP CHADRILL Consortium: The Lake CHAD Deep CRILLing project (CHADRILL); targeting ~10 million years of environmental and climate change in Africa. *Sci. Dril.*, 24, 71-79, <https://doi.org/10.5194/sd-24-71-2018>, 2018.
- Talbot, M.R.: Preliminary results from sediment cores from Lake Bosumtwi, Ghana. *Palaeoecol. Africa*, 16, 173-192, 1984.
- Talbot, M.R., and Delibrias, G.: Holocene variations in the lake level of Lake Bosumtwi, Ghana. *Nature*, 268, 722-724, <https://doi.org/10.1038/268722a0>, 1977.
- Talbot, M.R., and Kelts, K.: Primary and diagenetic carbonates in the anoxic sediments of Lake Bosumtwi, Ghana. *Geology* 14(11), 912-916, doi: 10.1130/0091-7613(1986)14<912:PADCIT>2.0.CO, 1986.
- Talbot, M.R., and Johannessen, T.: A high resolution palaeoclimatic record for the last 27,500 years in tropical West Africa from the carbon and nitrogen isotopic composition of lacustrine organic matter. *Earth Planet. Sci. Let.*, 110, 23-37, doi: 10.1016/0012-821X(92)90036-U, 1992.
- Tarasov, P.E., Andreev, A.A., Anderson, P.M., Lozhkin, A. V., Leipe, C., Haltia, E., Nowaczyk, N.R., Wennrich, V., Brigham-Grette, J., and Melles, M.: A pollen-based biome reconstruction over the last 3.562 million years in the Far East Russian Arctic; new insights into climate-vegetation relationships at the regional scale. *Clim. Past*, 9, 2759-2775, doi: 10.5194/cp-9-2759-2013, 2013.
- Tarasov, P., Granoszewski, W., Bezrukova, E., Brewer, S., Nita, M., Abzaeva, A., and Oberhänsli, H.: Quantitative reconstruction of the last interglacial vegetation and climate based on the pollen record from Lake Baikal, Russia. *Clim. Dyn.*, 25, 625-637, <https://doi.org/10.1007/s00382-005-0045-0>, 2005.

- Tarasov, P., Bezrukova, E., Karabanov, E., Nakagawa, T., Wagner, M., Kulagina, N., Letunova, P., Abzaeva, A., Granoszewski, W., and Riedel, F.L. Vegetation and climate dynamics during the Holocene and Eemian interglacials derived from Lake Baikal pollen records. *Palaeogeogr. Palaeoclimatol. Palaeoecol.*, 252, 440-457, <https://doi.org/10.1016/j.palaeo.2007.05.002>, 2007.
- Tarasov, P.E., Bezrukova, E., and Krivonogov, S.K.: Late Glacial and Holocene changes in vegetation cover and climate in southern Siberia derived from a 15 kyr long pollen record from Lake Kotokel. *Clim. Past*, 5, 285-295, <https://doi.org/10.5194/cp-5-285-2009>, 2009.
- Tarasov, P., Bezrukova, E., Karabanov, E., Nakagawa, T., Wagner, M., Kulagina, N., Letunova, P., Abzaeva, A., Granoszewski, W., and Riedel, F.: Vegetation and climate dynamics during the Holocene and Eemian interglacials derived from Lake Baikal pollen records. *Palaeogeogr. Palaeoclimatol. Palaeoecol.*, 252, 440-457, <https://doi.org/10.1016/j.palaeo.2007.05.002>, 2007.
- Tarasov, P., Cheddadi, R., Guiot, J., Bottema, S., Peyron, O., Belmonte, J., Ruiz-Sanchez, V., Saadi, F., and Brewer, S.: A method to determine warm and cool steppe biomes from pollen data; application to Mediterranean and Kazakhstan regions. *J. Quat. Sci.*, 13, 335-344, [https://doi.org/10.1002/\(SICI\)1099-1417\(199807/08\)13:4<335:AID-JQS375>3.0.CO;2-A](https://doi.org/10.1002/(SICI)1099-1417(199807/08)13:4<335:AID-JQS375>3.0.CO;2-A), 1998.
- Tarasov, P.E., Nakagawa, T., Demske, D., österle, H., Igarashi, Y., Kitagawa, J., Mokhova, L., Bazarova, V., Okuda, M., Gotanda, K., Miyoshi, N., Fujiki, T., Takemura, K., Yonenobu, H., and Fleck, A.: Progress in the reconstruction of Quaternary climate dynamics in the Northwest Pacific: a new modern analogue reference dataset and its application to the 430-kyr pollen record from Lake Biwa. *Earth-Sci. Rev.*, 108, 64-79, <https://doi.org/10.1016/j.earscirev.2011.06.002>, 2011.
- Thackeray, F., Scott, L., and Pieterse, P.: The Younger Dryas interval at Wonderkrater (South Africa) in the context of a platinum anomaly. *Palaeontologica Africana*, <http://wiredspace.wits.ac.za/handle/10539/28129>, 2019.
- Thompson, R.S.: Pliocene environments and climates in the western United States. *Quat. Sci. Rev.*, 10, 115-132, <https://pubs.er.usgs.gov/publication/70014990>, 1991.
- Thompson, R.S.: Pollen records, late Pleistocene, western North America. In: Elias, S.A. (ed.), *Encyclopedia of Quaternary Science*, Vol. 4, Elsevier, Amsterdam, pp. 2668-2681, 2007.
- Thompson, L.G., Davis, M.E., Mosley-Thompson, E., Sowers, T.A., Henderson, K.A., Zagorodnov, V.S., Lin, P.-N., Mikhalevko, V.N., Campen, R.K., Bolzan, J.F., Cole-Dasi, J., and Francou, B.: A 25,000-year tropical climate history from Bolivian ice cores. *Science*, 282, 1858-1864, doi: 10.1126/science.282.5395.1858, 1998.
- Tierney, J.E., Russell, J.M., Huang, Y.S., Sinninghe Damsté, J.S., Hopmans, E.C., Cohen, A.S., Hopmans, E.C., and Cohen, A.S.: Northern hemisphere controls on tropical southeast African climate during the past 60,000 years. *Science*, 322, 252- 255, doi: 10.1126/science.1160485, 2008.
- Torres, V., Vandenberghe, J., and Hooghiemstra, H.: An environmental reconstruction of the sediment infill of the Bogotá basin (Colombia) during the last 3 million years from abiotic and biotic proxies. *Palaeogeogr. Palaeoclimatol. Palaeoecol.*, 226, 127-148, <https://hdl.handle.net/11245/1.402756>, 2005.
- Torres, V.: Pliocene-Pleistocene evolution of flora, vegetation and climate: a palynological and sedimentological study of a 586-m core from the Bogotá basin, Colombia. PhD thesis, Univ. Amsterdam, 181 pp, 2006.
- Torres, V., Hooghiemstra, H., Lourens, L.J., and Tzedakis, P.C.: Astronomical tuning of long pollen records reveals the dynamic history of montane biomes and lake levels in the tropical high Andes during the Quaternary. *Quat. Sci. Rev.*, 63, 59-72, <https://hdl.handle.net/11245/1.402756>, 2013.
- Torres, V., and Hooghiemstra, H.: Quaternary ice ages in the northern Andes from sediment record Funza09, Bogotá basin, Colombia. *Quat. Sci. Rev.*, in prep
- Torres, T., Valle, M., Ortiz, J.E., Soler, V., Araujo, R., Rivas, M.R., Delgado, A., Julià, R., and Sánchez-Palencia, Y.: 800 ka of Palaeoenvironmental changes in the southwestern Mediterranean realm. *J. Iber. Geol.*, 46, 117-144, <https://doi.org/10.1007/s41513-020-00123-2>, 2020.

- Thouveny, N., and Williamson, D.: Palaeomagnetic study of the Holocene and Upper Pleistocene sediments from Lake Barombi Mbo, Cameroun: first results. *Phys. Earth Planet. Interiors*, 52, 193-206, [https://doi.org/10.1016/0031-9201\(88\)90115-X](https://doi.org/10.1016/0031-9201(88)90115-X), 1988.
- Turney, C.S.M., Kershaw, A.P., Moss, P., Bird, M.I., Fifield, L.K., Cresswell, R.G., Santos, G.M., Di Tada, M.L., Hausladen, P.A., and Zhou, Y.: Redating the onset of burning at Lynch's Crater (North Queensland); implications for human settlement in Australia. *J. Quat. Sci.*, 16, 767-771, <https://doi.org/10.1002/jqs.643>, 2001.
- Tzedakis, P.C.: Long-term tree populations in northwest Greece through multiple Quaternary climatic cycles. *Nature*, 364, 437-440, <https://doi.org/10.1038/364437a0>, 1993.
- Tzedakis, P.C.: Vegetation change through glacial-interglacial cycles: a long pollen sequence perspective. *Phil. Trans. Roy. Soc. London B*, 345, 403-432, <https://www.jstor.org/stable/55940>, 1994.
- Tzedakis, P.C.: Towards an understanding of the response of southern European vegetation to orbital and suborbital climate variability. *Quat. Sci. Rev.*, 25, 1585-1599, <https://doi.org/10.1016/j.quascirev.2004.11.012>, 2005.
- Tzedakis, C.: Pollen records, the last interglacial of Europe. In: Elias, S.A. (ed.), *Encyclopedia of Quaternary Science*, Vol. 4, Elsevier, Amsterdam, pp. 2597-2605, 2007.
- Tzedakis, P.C., Andrieu, V., De Beaulieu, J.-L., Birks, H.J.B., Crowhurst, S., Follieri, M., Hooghiemstra, H., Magri, D., Reille, M., Sadori, L., Shackleton, N.J., and Wijmstra, T.A.: Establishing a terrestrial chronological framework as a basis for biostratigraphical comparisons. *Quat. Sci. Rev.*, 20, 1583-1592, [https://doi.org/10.1016/S0277-3791\(01\)00025-7](https://doi.org/10.1016/S0277-3791(01)00025-7), 2001.
- Tzedakis, P.C., McManus, J.F., Hooghiemstra, H., Oppo, D.W., and Wijmstra, T.A.: Comparison of changes in vegetation in northeast Greece with records of climate variability on orbital and suborbital frequencies of the last 450,000 years. *Earth Planet. Sci. Lett.*, 212, 197-212, doi:10.1016/S0012-821X(03)00233-4, 2003.
- Tzedakis, P.C., Hooghiemstra, H., and Pälike, H.: The last 1.35 million years at Tenaghi Philippon: revised chronostratigraphy and long-term vegetation trends. *Quat. Sci. Rev.*, 25, 3416-3430, <https://doi.org/10.1016/j.quascirev.2006.09.002>, 2006.
- Urrego, D., Bush, M.B., and Silman, M.R.: A long history of cloud and forest migration from Lake Consuelo, Peru. *Quat. Res.*, 73, 364-373, doi: 10.1016/j.yqres.2009.10.005, 2010.
- Valero-Garcés, B.L., Jenny, B., Rondanelli, M., Delgado-Huertas, A., Burns, S.J., Veit, H., and Moreno, A.: Palaeohydrology of Laguna de Tagua Tagua (34°30'S) and moisture fluctuations in central Chile for the last 46,000 yr. *J. Quat. Sci.*, 20, 625-641, doi: 10.1002/jqs.988, 2005.
- Van der Goes, M.J., Newnham, R.M., Preusser, F., Hendy, C.H., Lowell, T.V., Fitzsimons, S.J., Hogg, A.G., Kasper, H.U., and Schlüchter, C.: Regional insolation forcing of late Quaternary climate change in the Southern Hemisphere. *Nature*, 436, 242-245, <https://doi.org/10.1038/nature03826>, 2005.
- Van der Hammen, T.: The Quaternary climatic changes of northern South America. *Ann. New York Acad. Sci.* 95, 676-683, doi: [10.1111/j.1749-6632.1961.tb50066.x](https://doi.org/10.1111/j.1749-6632.1961.tb50066.x), 1961.
- Van der Hammen, T.: A palynological study on the Quaternary of British Guiana. *Leid. Geol. Meded.*, 29, 125-180, 1963.
- Van der Hammen, T.: Climate and vegetational succession in the equatorial Andes of Colombia. In: Troll, C. (ed.), *Geo-ecology of the mountainous regions of the tropical Americas*. *Coll. Geograph.*, 9, p. 187-194, Geogr. Inst. Univ. Bonn, 1968.
- Van der Hammen, T.: The Pleistocene changes of vegetation and climate in the Northern Andes. In: Hastenrath, S.: *The glaciation of the Ecuadorian Andes*. Balkema, Rotterdam, pp. 125-145, 1981.
- Van der Hammen, T., and González, E.: Upper Pleistocene and Holocene climate and vegetation of the Sabana de Bogotá (Colombia, South America). *Leid. Geol. Meded.*, 25, 261-315, 1960.
- Van der Hammen, T., and González, E.: Historia de clima y vegetación del Pleistoceno superior y del Holoceno de la Sabana de Bogotá. *Bol. Geol.*, 11, 189-266, 1963.
- Van der Hammen, T., Wijmstra, T.A., and Van der Molen, W.H.: Palynological study of a very thick peat section in Greece and the Würm-glacial vegetation in the Mediterranean region. *Geol. Mijnb.*, 44, 37-39, [https://doi.org/10.1016/0031-0182\(71\)90049-6](https://doi.org/10.1016/0031-0182(71)90049-6), 1965.



- Van der Hammen, T., Wijmstra, T.A., and Zagwijn, W.H.: The floral record of the late Cenozoic of Europe. In: Turekian, K.K. (ed.), *Late Cenozoic glacial ages*, Yale Univ. Press, New Haven, pp. 391-424, 1971.
- Van der Wiel, A. M., and Wijmstra, T. A.: Palynology of the lower part (78–120 m) of the core Tenaghi Philippon II, Middle Pleistocene of Macedonia, Greece. *Rev. Palaeobot. Palynol.*, 52, 73–88, [https://doi.org/10.1016/0034-6667\(87\)90047-9](https://doi.org/10.1016/0034-6667(87)90047-9), 1987a.
- Van der Wiel, A. M., and Wijmstra, T. A.: Palynology of the 112.8–197.8 m interval of the core Tenaghi Philippon III, Middle Pleistocene of Macedonia, Greece. *Rev. Palaeobot. Palynol.*, 52, 89–117, [https://doi.org/10.1016/0034-6667\(87\)90048-0](https://doi.org/10.1016/0034-6667(87)90048-0), 1987b.
- Van Zeist, W.: Late Quaternary vegetation history of western Iran. *Rev. Palaeobot. Palynol.*, 2, 301–311, [https://doi.org/10.1016/0034-6667\(67\)90159-5](https://doi.org/10.1016/0034-6667(67)90159-5), 1967.<sup>[1]</sup><sub>SEP</sub>
- Van Zeist, W., and Bottema, S.: Palynological investigations in western Iran. *Palaeohistoria*, 19, 19–85, 1977.
- Van Zeist, W., and Bottema, S.: Late Quaternary vegetation of the Near East. *Beihefte zum Tübinger Atlas des Vorderen Orients*, A 18, 156 pp. Reichert, Wiesbaden, Germany, 1991.
- Van Zeist, W., and Woldring, H.: A postglacial pollen diagram from Lake Van in East Anatolia. *Rev. Palaeobot. Palynol.*, 26, 249–276, [https://doi.org/10.1016/0034-6667\(78\)90015-5](https://doi.org/10.1016/0034-6667(78)90015-5), 1978.
- Van Zeist, W., and Wright, H.E.: Preliminary pollen studies at Lake Zeribar, Zagros Mountains, southwestern Iran. *Science*, 140, 65–67, doi: 10.1126/science.140.3562.65, 1963.
- Verschuren, D., Sinninghe Damste, J.S., Moernaut, J., Kristen, I., Blaauw, M., Fagot, M., Haug, G.H., and CHALLACEA Project Members: Half-precessional dynamics of monsoon rainfall near the East African equator. *Nature*, 462, 637–641, <https://doi.org/10.1038/nature08520>, 2009.
- Verschuren, D., Olago, D.O., Rucina, S.M., and Odhengo, P.: Two glacial cycles of climate and ecosystem dynamics from equatorial East Africa. *Sci. Dril.*, 15, 72–76, doi:10.5194/sd-15-72-2013, 2013.
- Vilanova, I., Prieto, A.R., and Espinosa, M.: Palaeoenvironmental evolution and sea-level fluctuations along the southeastern Pampa grasslands coast of Argentina during the Holocene. *J. Quat. Sci.*, 21, 227–242, doi:10.1002/jqs.953, 2006.
- Vogel, H., Meyer-Jacob, C., Melles, M., Brigham-Grette, J., Andreev, A.A., Wennrich, V., Tarasov, P.E., and Rosén, P.: Detailed insight into Arctic climatic variability during MIS 11c at Lake El'gygytyn, NE Russia. *Clim. Past*, 9, 1467–1479, doi: 10.5194/cp-9-1467-2013, 2013.
- Vogel, H., Wagner, B., Zanchetta, G., Sulpizio, R., and Rosen, P.: A paleoclimatic record with tephrochronological age control for the last glacial-interglacial cycle from Lake Ohrid, Albania and Macedonia. *J. Paleolim.*, 44, 295–310, doi: 10.1007/s10933-009-9404-x, 2010.
- Vriend, M., Groot, M.H.M., Hooghiemstra, H., Bogotá-Angel, R.G., and Berrio, J.C.: Changing depositional environments in the Colombian Fúquene Basin at submillennial time-scales during 284–27 ka from unmixed grain-size distributions and aquatic pollen. *Neth. J. Geosci.*, 91, 199–214, doi: 10.1017/S0016774600001591, 2012.
- Wagner, B., Lotter, A., Nowaczyk, N., Reed, J., Schwalb, A., Sulpizio, R., Valsecchi, V., Wessels, M., and Zanchetta, G.: A 40,000-year record of environmental change from ancient Lake Ohrid (Albania and Macedonia). *J. Paleolim.*, 41, 407–430, <https://doi.org/10.1007/s10933-008-9234-2>, 2009.
- Wagner, B., Wilke, T., Krastel, S., Zanchetta, G., Sulpizio, R., Reicheter, K., Leng, M., Grazhdani, A., Trajanovski, S., Francke, A., Lindhorst, K., Levkov, Z., Cvetkoska, A., Reed, J.M., Zhang, X., Lacey, J.H., Wonik, T., Baumgarten, H., and Vogel, H.: The SCOPSCP drilling project recovers more than 1.3 million years of history from Lake Ohrid. *Sci. Dril.*, 17, 19–29, doi: 10.5194/sd-17-19-2014, 2014.
- Wagner, B., Vogel, H., Francke, A., Friedrich, T., Donders, T., Lacey, J.H., Leng, M.J., Regattieri, E., Sadori, L., Wilke, T., Zanchetta, G., Albrecht, C., Bertini, A., Combourieu-Nebout, N., Cvetkoska, A., Giaccio, B., Grazhdani, A., Hauffe, T., Holtvoeth, J., Joannin, S., Jovanovska, E., Just, J., Kouli, K., Kousis, I., Koutsodendris, A., Krastel, S., Lagos, M., Leicher, N., Levkov, Z., Lindhorst, K., Masi, A., Melles, M., Mercuri, A.M., Nomade, S., Nowaczyk, N., Panagiotopoulos, K., Peyron, O., Reed, J.M., Sagnotti, L., Sinopoli, G., Stelbrink, B., Sulpizio, R., Timmermann, A., Tofilovska, S., Torri, P., Wagner-Cremer, F., Wonik, T., and Zhang, X.

- S.: Mediterranean winter rainfall in phase with African monsoons during the past 1.36 million years. *Nature*, 573, 256–260, <https://doi.org/10.1038/s41586-019-1529-0>, 2019.
- Waldmann, N., Neugebauer, I., Palchan, D., Hadzhiivanova, E., Taha, N., Brauer, A., and Enzel, Y.: Sedimentology of the lacustrine formations in the Dead Sea Basin. In: Enzel, Y., Bar-Yosef, O. (eds.), *Quaternary of the Levant; environments, climate change, and humans*. Cambridge Univ. Press, Cambridge, UK, pp. 83–90, 2017.
- Wang, Y., Guo, F., Mas, L., Yan, Y., Liu, X., and Sun, Y.: Millennial-scale summer monsoon oscillations over the last 260 ka revealed by high-resolution elemental results of the Mangshan loess-palaeosol sequence from the southeastern Chinese Loess Plateau. *Quat. Intern.*, 552, 164–174, <https://doi.org/10.1016/j.quaint.2020.05.039>, 2020.
- Wasylikowa, K., Witkowski, A., Walanus, A., Huturowicz, A., Alexandrowicz, S.W., and Langer, J.L.: Palaeolimnology of Lake Zeribar, Iran, and its climatic implications. *Quat. Res.*, 66, 477–493, <https://doi.org/10.1016/j.yqres.2006.06.006>, 2006.
- Wasylikowa, K., and Witkowski, A. (eds.): *The palaeoecology of Lake Zeribar and surrounding areas, western Iran during the last 18,000 years*. Gantner, Ruggell, Germany, 2008.
- Watts, W.A.: Paleocological studies at Lake Patzcuaro on the west-central Mexican Plateau and at Chalco in the Basin of Mexico. *Quat. Res.*, 17, 56–70, [https://doi.org/10.1016/0033-5894\(82\)90045-X](https://doi.org/10.1016/0033-5894(82)90045-X), 1982.
- Watts, W. A.: A long pollen record from Laghi di Monticchio, southern Italy: a preliminary account. *J. Geol. Soc.*, 142, 491–499, <https://doi.org/10.1144/gsjgs.142.3.0491>, 1985.
- Watts, W.A., Allen, J.R.M., and Huntley, B.: Vegetation history and palaeoclimate of the Last Glacial period at Lago Grande di Monticchio, southern Italy. *Quat. Sci. Rev.*, 15, 133–153, [https://doi.org/10.1016/0277-3791\(95\)00093-3](https://doi.org/10.1016/0277-3791(95)00093-3), 1996a.
- Watts, W.A., Allen, J.R.M., Huntley, B., and Fritz, S.C.: Vegetation history and climate of the last 15,000 years at Laghi Di Monticchio, southern Italy. *Quat. Sci. Rev.*, 15, 113–132, doi: 10.1016/0277-3791(95)00038-0, 1996b.
- Wei, J.H., Finkelstein, D.B., Brigham-Grette, J., Castañeda, I.S., and Nowaczyk, N.: Sediment colour reflectance spectroscopy as a proxy for wet/dry cycles at Lake El'gygytgyn, Far East Russia, during Marine Isotope Stages 8 to 12. *Sedimentology*, 61, 1793–1811, doi: 10.1111/sed.12116, 2014.
- Weinstein-Evron, M.: The paleoecology of the early Würm in the Hula Basin, Israel. *Paléorient*, 9, 5–19, 1983.
- Weldeab, S., Lea, D.W., Schneider, R.R., and Andersen, N.: 155,000 years of West African monsoon and ocean thermal evolution. *Science*, 316, 1303–1307, doi: 10.1126/science.1140461, 2007.
- Wennrich, V., Minyuk, P.S., Borkhodoev, V., Francke, A., Ritter, B., Nowaczyk, N.R., Sauerbrey, M.A., Brigham-Grette, J., and Melles, M.: Pliocene to Pleistocene climate and environmental history of Lake El'gygytgyn, Far East Russian Arctic, based on high- resolution inorganic geochemistry data. *Clim. Past*, 10, 1381–1399, doi: 10.5194/cp-10-1381-2014, 2014.
- Whitney, B.S., Mayle, F.E., Burn, M.J., Guillén, R., Chavez, E., and Pennington, R.T.: Sensitivity of Bolivian seasonally-dry tropical forest to precipitation and temperature changes over glacial–interglacial timescales. *Veg. Hist. Archaeobot.*, 23, 1–14, doi:10.1007/s00334-013-0395-1, 2014.
- Whitney, B.S., Mayle, F.E., Punyasena, S.W., Fitzpatrick, K.A., Burn, M.J., Guillen, R., Chavez, E., Mann, D., Pennington, R.T., and Metcalfe, S.E.: A 45 kyr palaeoclimate record from the lowland interior of tropical South America. *Palaeogeogr. Palaeoclimatol. Palaeoecol.*, 307, 177–192, doi:10.1016/j.palaeo.2011.05.012, 2011.
- Whitlock, C., Sarna-Wojcicki, A.M., Bartlein, P.J., and Nickmann, R.J.: Environmental history and tephrostratigraphy at Carp Lake southwestern Columbia Basin. *Palaeogeogr. Palaeoclimatol. Palaeoecol.*, 155, 7–29, doi: 10.1016/s0031-0182(99)00092-9, 2000.
- Wilkie, K.M.K., Chapligin, B., Meyer, H., Burns, S., Petsch, S., and Brigham-Grette, J.: Modern isotope hydrology and controls on  $\delta D$  of plant leaf waxes at Lake El'gygytgyn, NE Russia. *Clim. Past*, 9, 335–352, doi: 10.5194/cp-9-335-2013, 2013.
- Wille, M.: *Vegetation history and climate records of Colombian lowland areas: rain forest, savanna and intermontane ecosystems*. Ph.D. dissertation, Univ. Amsterdam, Amsterdam, The Netherlands, 163 pp, 2001.

- Wille, M., Hooghiemstra, H., Behling, H., Van der Borg, K., and Negret, A.J.: Environmental change in the Colombian subandean forest belt from 8 pollen records: the last 50 kyr. *Veg. Hist. Archaeobot.*, 10, 61–77, <https://hdl.handle.net/11245/1.185744>, 2001.
- Williams, D. F., Kuzmin, M. I., Prokopenko, A. A., Karabanov, E. B., Khursevich, G. K., and Bezrukova, E. V.: The Lake Baikal drilling project in the context of a global lake drilling initiative. *Quat. Intern.*, 80–81, 3–18, doi: 10.1016/S1040- 6182(01)00015-5, 2001.
- Williams, D. F., Peck, J., Karabanov, E. B., Prokopenko, A. A., Kravchinsky, V., King, J., and Kuzmin, M. I.: Lake Baikal record of continental climate response to orbital isolation during the past 5 million years. *Science*, 278, 1114–1117, doi: [10.1126/science.278.5340.1114](https://doi.org/10.1126/science.278.5340.1114), 1997.
- Wijmstra, T. A.: Palynology of the first 30 m of a 120 m deep section in northern Greece. *Acta Bot. Neerl.*, 18, 511–527, <https://doi.org/10.1111/j.1438-8677.1969.tb00591.x>, 1969.
- Wijmstra, T.A., and Van der Hammen, T.: Palynological data on the history of tropical savannas in northern South America. *Leid. Geol. Meded.*, 38, 71-90, 1966.
- Wijmstra, T. A., and Groenhart, M. C.: Record of 700,000 years vegetational history in Eastern Macedonia (Greece). *Rev. Acad. Col. Cienc. Ex. Fis. Nat.*, 15, 87–98, 1983.
- Wijmstra, T. A., and Smit, A.: Palynology of the middle part (30–78 meters) of a 120 m deep section in northern Greece (Macedonia). *Acta Bot. Neerl.*, 25, 297–312, <https://doi.org/10.1111/j.1438-8677.1976.tb00241.x>, 1976.
- Winograd, I.J., Coplen, T.B., Landwehr, J.M., Riggs, A.C., Ludwig, K.R., Szabo, B.J., Kolesar, P.T., and Revesz, K.M.: Continuous 500,000-year climate record from vein calcite in Devils Hole, Nevada. *Science*, 258, 255-260, doi: 10.1126/science.258.5080.255, 1992.
- Woillard, G.M.: Grande Pile peat bog: a continuous pollen record for the last 140,000 years. *Quat. Res.*, 12, 152-155, [https://doi.org/10.1016/0033-5894\(78\)90079-0](https://doi.org/10.1016/0033-5894(78)90079-0), 1978.
- Woillard, G.M.: Abrupt end of the last interglacial s.s. in NE France. *Nature*, 281, 558-562, <https://doi.org/10.1038/281558a0>, 1979.
- Woillard, G.M., and Mook, W.G.: Carbon-14 dates at Grande Pile: correlation of land and sea chronologies. *Science*, 215, 159-161, doi: 10.1126/science.215.4529.159, 1982.
- Woltering, M., Johnson, T.C., Werne, J.P., Schouten, S., and Sinninghe Damsté, J.S.: Late Pleistocene temperature history of Southeast Africa: a TEX86 temperature record from Lake Malawi. *Palaeogeogr. Palaeoclimatol. Palaeoecol.*, 303, 93-102, doi: 10.1016/j.palaeo.2010.02.013, 2011.
- Woelfenden, W.B.: A 180,000-year pollen record from Owens Lake, CA; terrestrial vegetation change on orbital scales. *Quat. Res.*, 59, 430-444, [https://doi.org/10.1016/S0033-5894\(03\)00033-4](https://doi.org/10.1016/S0033-5894(03)00033-4), 2003.
- Wooller, M.J., Swain, D.L., Ficken, K.J., Agnew, A.D.Q., Street-Perrott, F.A., and Eglinton, G.: Late Quaternary vegetation changes around Lake Rutundu, Mount Kenya, East Africa: evidence from grass cuticles, pollen and stable carbon isotopes. *J. Quat. Sci.*, 18, 3-15, <https://doi.org/10.1002/jqs.725>, 2003.
- Xiao, X.Y., Shen, J., Wang, S.M., Xiao H.F., and Tong, G.B.: Palynological evidence for vegetational and climatic changes from the HQ deep drilling core in Yunnan Province, China. *Science China Series Earth Sciences*, 50, 1189-1201, doi: <https://doi.org/10.1007/s11430-007-0058-0>, 2007.
- Yao, Y.F., Song, X.Y., Wortley, A.H., Wang, Y.F., Blackmore, S., and Li, C.S.: Pollen-based reconstruction of vegetational and climatic change over the past ~30 ka at Shudu Lake in the Hengduan Mountains of Yunnan, Southwestern China. *PLoS One*, 12, doi: 10.1371/journal.pone.0171967, 2017.
- York, L.L., Wehmiller, J.F., Cronin, T.M., and Ager, T.A.: Stetson Pit, Dare County, North Carolina: an integrated chronologic, faunal, and floral record of subsurface coastal Quaternary sediments. *Palaeogeogr. Palaeoclimatol. Palaeoecol.*, 72, 115-132, doi: [10.1016/0031-0182\(89\)90136-3](https://doi.org/10.1016/0031-0182(89)90136-3), 1989.
- Zagwijn, W.H.: Variations in climate as shown by pollen analysis, especially in the lower Pleistocene of Europe. In: Right, A.E., Mosely, F. (eds.) *Ice ages: ancient and modern*. *Geol. J. Sp. Issue*, 6, 137-152. Seel House Press, Liverpool, 1975.
- Zander, A., and Hilgers, A.: Potential and limits of OSL, TT-OSL, IRSL and pIRIR290 dating methods applied on a middle Pleistocene sediment record of Lake El'gygytgyn, Russia. *Clim. Past*, 9, 719–733, doi: 10.5194/cp-9-719-2013, 2013.

- Zhang, E., Wang, Y., Sun, W, and Shen, J.: Holocene Asian monsoon evolution revealed by a pollen record from an alpine lake on the southeastern margin of the Qinghai-Tibetan Plateau, China. *Clim. Past*, 12, 415-427, <https://doi.org/10.5194/cp-12-415-2016>, 2016.
- Zhao, W.W., Andreev, A.A., Wennrich, V., Tarasov, P.E.E., Anderson, P., Lozhkin, A.V. V, and Melles, M.: The Réunion Subchron vegetation and climate history of the northeastern Russian Arctic inferred from the Lake El'gygytgyn pollen record. *Palaeogeogr. Palaeoclimatol. Palaeoecol.*, 436, 167–177, doi: 10.1016/j.palaeo.2015.06.047, 2015.
- Zhao, Y., Liang, C, Cui, Q., Qin, F., Zheng, Z., Xiao, X., Ma, C., Felde, V.A., Liu, Y., Li, Q., Zhang, Z., Herzschuh, U., Xu, Q., Wei, H., Cai, M., Cao, X., Guo, Z., and Birks, H.J.B.: Temperature reconstructions for the last 1.74 Ma on the eastern Tibetan Plateau based on a novel pollen-based quantitative method. *Glob. Planet. Change*, 199,, <https://doi.org/10.1016/j.gloplacha.2021.103433>, 2021.
- Zhisheng, A., Li, A., Yougui, S., and Colman, S.M.: Lake Qinghai Scientific Drilling Project. *Sci. Dril.*, 2, 20–22, doi: 10.5194/sd-2-20-2006, 2006.
- Zolitschka, B., Corbella, H., Maidana, N., and Ohlendorf, C.: Investigating maar formation and the climate history of southern Argentina – the Potrok Aike Maar Lake Sediment Archive Drilling Project (PASADO). *Sci. Dril.*, 3, 54–55, doi:10.5194/sd-3-54-2006, 2006.
- Zolitschka, B., and Negendank, J.F.W.: High-resolution records from European lakes. *Quat. Sci. Rev.*, 18, 885–888, [https://doi.org/10.1016/S0277-3791\(99\)00002-5](https://doi.org/10.1016/S0277-3791(99)00002-5), 1999.
- Zondervan, J.R.: Palynology of Lake George; a review of palynology, Lake George and regional and global Quaternary comparisons and the start of palynological analysis of a new Lake George core. Unpublished master thesis, The Australian National University, Canberra, Australia, doi:10.13140/RG.2.1.3760.7923, 2016.

--
